# Supplementary material for: Setting priorities for ageing research in Africa: A systematic mapping review of 512 studies from sub-Saharan Africa
Source: PubMed Central journal article supplement (PMC8284542; doi:10.7189/11.15002), 2021-06-26
Supplement: jogh-11-15002-s001.pdf [file jogh-11-15002-s001.pdf]

## Appendix S1: Sample search strategy in CINHAL

| <a href="#">Search ID#</a> | Search Terms                                                                                                                                                                                                                                                                                 | Search Options                | Actions                                                                                        |
|----------------------------|----------------------------------------------------------------------------------------------------------------------------------------------------------------------------------------------------------------------------------------------------------------------------------------------|-------------------------------|------------------------------------------------------------------------------------------------|
| S9                         | S7 AND S8                                                                                                                                                                                                                                                                                    | Search modes - Boolean/Phrase | <a href="#">View Results</a> (1,926)<br><a href="#">View Details</a><br><a href="#">Edit</a>   |
| S8                         | S1 OR S2 OR S3 OR S4 OR S5 OR S6                                                                                                                                                                                                                                                             | Search modes - Boolean/Phrase | <a href="#">View Results</a> (493,692)<br><a href="#">View Details</a><br><a href="#">Edit</a> |
| S7                         | (MH "Africa") OR "africa" OR (MH "Africa South of the Sahara") OR (MH "Africa, Western") OR (MH "Africa, Southern") OR (MH "Africa, Northern") OR (MH "Africa, Eastern") OR (MH "Africa, Central") OR (MH "South Africa") OR (MH "Nigeria") OR (MH "Ghana") OR (MH "KENYA") OR (MH "Uganda") | Search modes - Boolean/Phrase | <a href="#">View Results</a> (22,777)<br><a href="#">View Details</a><br><a href="#">Edit</a>  |
| S6                         | "older person"                                                                                                                                                                                                                                                                               | Search modes - Boolean/Phrase | <a href="#">View Results</a> (875)<br><a href="#">View Details</a><br><a href="#">Edit</a>     |
| S5                         | (MH "Geriatrics") OR "Gerontology"                                                                                                                                                                                                                                                           | Search modes - Boolean/Phrase | <a href="#">View Results</a> (4,538)<br><a href="#">View Details</a><br><a href="#">Edit</a>   |
| S4                         | (MH "Aged") OR "aged"                                                                                                                                                                                                                                                                        | Search modes - Boolean/Phrase | <a href="#">View Results</a> (476,124)<br><a href="#">View Details</a><br><a href="#">Edit</a> |
| S3                         | "senior citizens"                                                                                                                                                                                                                                                                            | Search modes - Boolean/Phrase | <a href="#">View Results</a> (368)<br><a href="#">View Details</a><br><a href="#">Edit</a>     |
| S2                         | "older adults"                                                                                                                                                                                                                                                                               | Search modes - Boolean/Phrase | <a href="#">View Results</a> (29,413)<br><a href="#">View Details</a><br><a href="#">Edit</a>  |
| S1                         | (MH "Aged, 80 and Over") OR (MH "Aged") OR "elderly"                                                                                                                                                                                                                                         | Search modes - Boolean/Phrase | <a href="#">View Results</a> (434,318)<br><a href="#">View Details</a><br><a href="#">Edit</a> |

**Appendix S2 : Characteristics of included articles: Quantitative (n=426), qualitative (n=71) and mixed method (n=15)**

| <b>QUANTITATIVE ARTICLES (n=426)</b> |                                                                                                                                                                                                 |                              |                                          |
|--------------------------------------|-------------------------------------------------------------------------------------------------------------------------------------------------------------------------------------------------|------------------------------|------------------------------------------|
| <b>Authors (Year), Country</b>       | <b>Title</b>                                                                                                                                                                                    | <b>Study design</b>          | <b>Sample size</b>                       |
| Abbai et al (2018), South Africa     | Good correlation between the Afinion AS100 analyser and the ABX Pentra 400 analyser for the measurement of glycosylated haemoglobin and lipid levels in older adults in Durban, South Africa    | Cross-sectional              | 435                                      |
| Abeme et al (2020), Nigeria          | Blood Pressure Control and Kidney Damage in Hypertension: Results of a Three-Center Cross-Sectional Study in North Central Nigeria                                                              | Cross-sectional              | 1063                                     |
| Abelson (2013), South Africa         | Left atrial appendage closure in patients with atrial fibrillation in whom warfarin is contra-indicated: initial South African experience.                                                      | Pre-post (prospective)       | 12                                       |
| Aboderin et al (2017), Kenya         | Musculoskeletal health conditions among older populations in urban slums in sub-Saharan Africa                                                                                                  | Cross-sectional              | 2006/07 survey - 921, 2016 survey - 1497 |
| Ackuaku dogbe et al (2015), Ghana    | Cataract Surgical Uptake Among Older Adults in Ghana                                                                                                                                            | Cross-sectional              | 5571                                     |
| Adam et al (2013), South Africa      | Effect of pre-fracture mobility on the early post-operative functional outcome in elderly patients with a hip fracture                                                                          | Pre-post (observational)     | 90                                       |
| Adebajo et al (1991), Nigeria        | Fractures of the hip and distal forearm in West Africa and the United Kingdom.                                                                                                                  | Case-control (Retrospective) | 746700: Ibadan, 416500: Southampton      |
| Adebusoye et al (2018), Nigeria      | Factors Associated With Sarcopenia Among Older Patients Attending a Geriatric Clinic in Nigeria                                                                                                 | Cross-sectional              | 624                                      |
| Adebusoye et al (2020), Nigeria      | Mortality Trends among Older Patients Admitted to the Geriatric Centre, University College Hospital, Ibadan, Nigeria, 2013-2017.                                                                | Cross-sectional              | 1091                                     |
| Adhvaryu (2007), Tanzania            | The Long-Run Impacts of Adult Deaths on Older Household Members in Tanzania                                                                                                                     | Longitudinal                 | 613                                      |
| Agboghoroma et al (2020), Nigeria    | Peripheral arterial disease and its correlates in patients with type 2 diabetes mellitus in a teaching hospital in northern Nigeria: a cross-sectional study                                    | Cross-sectional              | 200                                      |
| Agbozo et al (2018), Ghana           | Nutrition knowledge, dietary patterns and anthropometric indices of older persons in four peri-urban communities in Ga West municipality, Ghana                                                 | Cross-sectional              | 120                                      |
| Agyemang-Duah et al (2020) Ghana     | Predictors of healthcare utilisation among poor older people under the livelihood empowerment against poverty programme in the Atwima Nwabiagya District of Ghana                               | Cross-sectional              | 200                                      |
| Aheto et al (2020), Ghana            | Prevalence, socio-demographic and environmental determinants of asthma in 4621 Ghanaian adults: Evidence from Wave 2 of the World Health Organization's study on global AGEing and adult health | Cross-sectional              | 4621                                     |

|                                                  |                                                                                                                                                             |                              |        |
|--------------------------------------------------|-------------------------------------------------------------------------------------------------------------------------------------------------------------|------------------------------|--------|
| Akande-Sholabi et al (2020), Nigeria             | Pharmacists' knowledge and counselling on fall risk increasing drugs in a tertiary teaching hospital in Nigeria                                             | Cross-sectional              | 56     |
| Akande-Sholabi et al (2020), Nigeria             | Evaluation of Prescription Pattern of Analgesic Use among Ambulatory Elderly in South-Western Nigeria                                                       | Cross-sectional              | 337    |
| Akinyemi et al (2008), Nigeria                   | The Nigerian Aging Males' Symptoms scale. Experience in elderly males                                                                                       | Cross-sectional              | 456    |
| Akinyemi et al (2014), Nigeria, Sudan & Tanzania | Contribution of Non-communicable Diseases to Medical Admissions of Elderly Adults in Africa: A Prospective, Cross-sectional in Nigeria, Sudan, and Tanzania | Cross-sectional              | 874    |
| Akinyemi et al (2017), Nigeria                   | Demographic and epidemiological characteristics of HIV opportunistic infections among older adults in Nigeria                                               | Longitudinal (cohort)        | 17,312 |
| Akinyemu et al (2014), Nigeria                   | Profile and Determinants of Vascular Cognitive Impairment in African Stroke Survivors: The CogFAST Nigeria Study                                            | Case-control                 | 217    |
| Akinyemu et al (2015), Nigeria                   | Medial Temporal Lobe Atrophy, White Matter Hyper-intensities and Cognitive Impairment Among Nigerian African Stroke Survivors                               | Cross-sectional              | 58     |
| Akosile et al (2014), Nigeria                    | Fear of falling and quality of life of apparently-healthy elderly individuals from a Nigerian population.                                                   | Cross-sectional              | 261    |
| Akosile et al (2018), Nigeria                    | Depression, Functional Disability and Quality of Life Among Nigerian Older Adults: Prevalence and Relationships                                             | Cross-sectional              | 206    |
| Akor et al (2020), Nigeria                       | Predictors of Health-Related Quality of Life in patients with Chronic Obstructive Pulmonary Diseases using the COPD assessment test                         | Cross-sectional              | 60     |
| Akoria et al (2020), Nigeria                     | Evaluation of Documentation of Admissions into A Geriatrics Unit in Nigeria: 2014-2018                                                                      | Cross-sectional              | 835    |
| Akuamoah-Boateng et al (2013), Ghana             | Self-reported Vision Health Status Among Older People in the Kassena-Nankana District, Ghana                                                                | Cross-sectional              | 4294   |
| Alberts et al (1991), South Africa               | Metastatic breast cancer - age has a significant effect on survival                                                                                         | Longitudinal (retrospective) | 426    |
| Allain et al (2014), Malawi                      | Falls and other geriatric syndromes in Blantyre, Malawi: a community survey of older adults                                                                 | Cross-sectional              | 98     |
| Amegbo et al (2018), Ghana                       | Predictors of basic self-care and intermediate self-care functional disabilities among older adults in Ghana.                                               | Cross-sectional              | 4107   |
| Amegbor et al (2020), Ghana                      | Effect of cognitive and structural social capital on depression among older adults in Ghana: A multilevel cross-sectional analysis                          | Cross-sectional              | 4123   |
| Ameh et al (2015), South Africa                  | Predictors of health care use by adults 50 years and over in a rural South African setting.                                                                 | Cross-sectional              | 5795   |
| Amoo et al (2020), Nigeria                       | Prevalence and Pattern of Psychiatric Morbidity Among Community-Dwelling Elderly Populations in Abeokuta, Nigeria                                           | Not stated                   | 532    |
| Amosun (2014), South Africa                      | The process of enhancing a geriatric module in undergraduate physiotherapy education in South Africa - perceived attitudes                                  | Cross-sectional              | 100    |

|                                      |                                                                                                                                                                                                               |                              |       |
|--------------------------------------|---------------------------------------------------------------------------------------------------------------------------------------------------------------------------------------------------------------|------------------------------|-------|
|                                      | towards ageing among community-dwelling elderly persons in Cape Town                                                                                                                                          |                              |       |
| Amosun et al (2007), South Africa    | Are elderly pedestrians allowed enough time at pedestrian crossings in Cape Town, South Africa?                                                                                                               | Cross-sectional              | 60    |
| Annin et al (2014), Ghana            | Assessing the association between the degree of pain and socioeconomic status among older persons in Ghana.                                                                                                   | Cross-sectional              | 5108  |
| Ardington et al (2009), South Africa | The impact of AIDS on intergenerational support in South Africa: Evidence from the Cape area panel study.                                                                                                     | Longitudinal (retrospective) | 696   |
| Awoke et al (2017), Ghana            | Predictors of public and private healthcare utilization and associated health system responsiveness among older adults in Ghana.                                                                              | Cross-sectional              | 2517  |
| Awuviry-Newton et al (2020), Ghana   | Do factors across the World Health Organisation's International Classification of Functioning, Disability and Health framework relate to caregiver availability for community dwelling older adults in Ghana? | Cross-sectional              | 400   |
| Awuviry-Newton et al (2020), Ghana   | Correlates of older adult inpatients' personal care provision to people with functional difficulties in Ghana                                                                                                 | Cross-sectional              | 400   |
| Ayernor et al (2012), Ghana          | Disease of Ageing in Ghana                                                                                                                                                                                    | Cross-sectional              | 507   |
| Ayodapo et al (2020), Nigeria        | Patient Education and Medication Adherence among Hypertensives in a Tertiary Hospital, South Western Nigeria                                                                                                  | Cross-sectional              | 420   |
| Ayuk et al (2020), Nigeria           | Impact of Diabetes Mellitus on Sexuality in a Developing Country Setting: A Case-Control Study in Calabar, Nigeria                                                                                            | Case-control                 | 330   |
| Balogun et al (2019), Nigeria        | Determinants of Bed Net Use Among Older People in Nigeria: Results From a Nationally Representative Survey                                                                                                    | Cross-sectional              | 3586  |
| Bastawrous et al (2016), Kenya       | Six-Year Incidence of Blindness and Visual Impairment in Kenya: The Nakuru Eye Disease Cohort Study                                                                                                           | Longitudinal (cohort)        | 5000  |
| Beauge et al (2020), Burkina Faso    | Do Targeted User Fee Exemptions Reach the Ultra-Poor and Increase their Healthcare Utilisation? A Panel Study from Burkina Faso                                                                               | Longitudinal                 | 1260  |
| Bennett et al (2016), Kenya          | Gender differentials and old age survival in the Nairobi slums, Kenya.                                                                                                                                        | Longitudinal                 | 2417  |
| Biritwum et al (2013), Ghana         | Household characteristics for older adults and study background from SAGE Ghana Wave 1                                                                                                                        | Longitudinal                 | 6000  |
| Bloomfield et al (2017), Kenya       | Markers of Atherosclerosis, Clinical Characteristics, and Treatment Patterns in Heart Failure A Case-Control Study of Middle-Aged Adult Heart Failure Patients in Rural Kenya                                 | Case control                 | 5562  |
| Boateng et al (2017), Ghana          | Obesity and the burden of health risks among the elderly in Ghana: A population study                                                                                                                         | Cross-sectional              | 2,091 |

|                                       |                                                                                                                                                                                          |                              |       |
|---------------------------------------|------------------------------------------------------------------------------------------------------------------------------------------------------------------------------------------|------------------------------|-------|
| Boon et al (2009), South Africa       | The impact of a community-based pilot health education intervention for older people as caregivers of orphaned and sick children as a result of HIV and AIDS in South Africa.            | Pre-post                     | 202   |
| Boon et al (2010), South Africa       | Correlates of grief among older adults caring for children and grandchildren as a consequence of HIV and AIDS in South Africa.                                                           | Cross-sectional              | 755   |
| Boon et al (2010), South Africa       | Explaining perceived ability among older people to provide care as a result of HIV and AIDS in South Africa.                                                                             | Cross-sectional              | 409   |
| Bornman et al (2007), South Africa    | Serum testosterone levels in South African men and the onset of androgen decline in ageing males                                                                                         | Not stated                   | 40    |
| Brathwaite et al (2002), South Africa | Elderly citizen's perception of their health and care provided in a rural South African community.                                                                                       | Cross-sectional              | 201   |
| Cadmus et al (2017), Nigeria          | A Descriptive Study of the Morbidity Pattern of Older Persons Presenting at a Geriatric Centre in Southwestern Nigeria                                                                   | Cross-sectional              | 4886  |
| Callixte et al (2015), Cameroon       | The pattern of neurological diseases in elderly people in outpatient consultations in Sub-Saharan Africa.                                                                                | Longitudinal (retrospective) | 912   |
| Calys-Tagoe (2014), Ghana             | Predictors of Subjective Well-Being Among Older Ghanaians                                                                                                                                | Cross-sectional              | 4724  |
| Calys-Tagoe et al (2020), Ghana       | Individual awareness and treatment effectiveness of hypertension among older adults in Ghana: evidence from the World Health Organization study of global ageing and adult health wave 2 | Cross-sectional              | 3575  |
| Charlton et al (1997), South Africa   | The prevalence of diabetes mellitus and associated risk factors in elderly coloured South Africans                                                                                       | Cross-sectional              | 200   |
| Charlton et al (2007), South Africa   | The MNA, but not the DETERMINE, screening tool is a valid indicator of nutritional status in elderly Africans. Nutrition.                                                                | Cross-sectional              | 283   |
| Chepngeno-Langat et al (2011), Kenya  | Gender differentials on the health consequences of care-giving to people with AIDS-related illness among older informal carers in two slums in Nairobi, Kenya.                           | Cross-sectional              | 1492  |
| Chepngeno-Langat et al (2012), Kenya  | Concern About HIV and AIDS Among Older People in the Slums of Nairobi, Kenya                                                                                                             | Longitudinal                 | 2,061 |
| Chepngeno-Langat (2013), Kenya        | Perception of vulnerability to HIV infection among older people in Nairobi, Kenya: a need for intervention                                                                               | Longitudinal                 | 2053  |
| Chepngeno-Langat et al (2014), Kenya  | Entry and re-entry into informal care-giving over a 3-year prospective study among older people in Nairobi slums, Kenya                                                                  | Cross-sectional              | 2696  |
| Chilima et al (1998), Malawi          | Anthropometric characteristics of older people in rural Malawi.                                                                                                                          | Cross-sectional              | 296   |
| Chilima et al (2001), Malawi          | Nutrition and handgrip strength of older adults in rural Malawi                                                                                                                          | Cross-sectional              | 296   |
| Chukwuorji et al (2017), Nigeria      | Stressful life events, family support and successful ageing in the Biafran War generation.                                                                                               | Cross-sectional              | 453   |
| Clark et al (2014), Nigeria & USA     | Obesity and 10-year mortality in very old African Americans and Yoruba-Nigerians: exploring the obesity paradox.                                                                         | Longitudinal (cohort)        | 4698  |

|                                                                                                                                                                                               |                                                                                                                                                                                      |                          |      |
|-----------------------------------------------------------------------------------------------------------------------------------------------------------------------------------------------|--------------------------------------------------------------------------------------------------------------------------------------------------------------------------------------|--------------------------|------|
| Clausen (2005), Botswana                                                                                                                                                                      | Predictors of Food Variety and Dietary Diversity Among Older Persons in Botswana                                                                                                     | Cross-sectional          | 1085 |
| Dake & Welen (2020) Ghana                                                                                                                                                                     | Towards universal access to healthcare for older adults: an assessment of the old-age exemption policy under Ghana's National Health Insurance Scheme                                | Cross-sectional          | 2412 |
| De Jager et al (2017), South Africa                                                                                                                                                           | Dementia prevalence in a rural region of South Africa: A Cross-sectional community study.                                                                                            | Cross-sectional          | 1394 |
| de Picciotto et al (2001), South Africa                                                                                                                                                       | Verbal Fluency in Elderly Bilingual Speakers: Normative Data and Preliminary Application to Alzheimer's Disease                                                                      | Not stated               | 36   |
| de Rouvray et al (2014), central African Republic and Congo                                                                                                                                   | The nutritional status of older people with and without dementia living in an urban setting in central Africa: the EDAC study                                                        | Cross-sectional          | 1016 |
| De-Terline et al (2020), 12 countries: Benin, Cameroon, Congo (Brazzaville), Democratic Republic of the Congo, Gabon, Guinea, Cote d'Ivoire, Mauritania, Mozambique, Niger, Senegal and Togo) | Poor adherence to medication and salt restriction as a barrier to reaching blood pressure control in patients with hypertension: Cross-sectional study from 12 sub-Saharan countries | Cross-sectional          | 2198 |
| De Villiers et al (2009), South Africa                                                                                                                                                        | Efficacy and safety of a live attenuated influenza vaccine in adults 60 years of age and older                                                                                       | Randomized Control Trial | 3242 |
| De Villiers et al (2011), South Africa                                                                                                                                                        | Stroke outcomes in a socio-economically disadvantaged urban community                                                                                                                | Not stated               | 196  |
| Dei (2018), Ghana                                                                                                                                                                             | Is healthcare really equal for all? Assessing the horizontal and vertical equity in healthcare utilisation among older Ghanaians                                                     | Cross-sectional          | 4304 |
| Desormais et al (2014), Central African Republic                                                                                                                                              | Prevalence of peripheral artery disease in the elderly population in urban and rural areas of Central Africa: the EPIDEMCA study                                                     | Not stated               | 1871 |
| Dewhurst et al (2012), Tanzania                                                                                                                                                               | The prevalence of disability in older people in Hai, Tanzania                                                                                                                        | Cross-sectional          | 2232 |
| Dewhurst et al (2012), Tanzania                                                                                                                                                               | Rates of diagnosis and treatment of neurological disorders within a prevalent population of community-dwelling elderly people in sub-Saharan Africa                                  | Longitudinal (cohort)    | 2232 |
| Dewhurst et al (2012), Tanzania                                                                                                                                                               | Strikingly Low Prevalence of Atrial Fibrillation in Elderly Tanzanians                                                                                                               | Cross-sectional          | 2232 |
| Dewhurst et al (2013), Tanzania                                                                                                                                                               | The prevalence of neurological disorders in older people in Tanzania                                                                                                                 | Cross-sectional          | 2232 |
| Dewhurst et al (2013), Tanzania                                                                                                                                                               | The high prevalence of hypertension in rural-dwelling Tanzanian older adults and the disparity between detection, treatment and control: a rule of sixths?                           | Longitudinal (cohort)    | 2232 |
| Dewhurst et al (2014)                                                                                                                                                                         | Electrocardiographic Reference Values for a Population of Older Adults in Sub-Saharan Africa                                                                                         | Cross-sectional          | 2232 |
| Dia et al (2014), Senegal                                                                                                                                                                     | Respiratory viruses associated with patients older than 50 years presenting with ILI in Senegal, 2009 to 2011                                                                        | Longitudinal (cohort)    | 232  |

|                                                            |                                                                                                                                                                                  |                           |                                      |
|------------------------------------------------------------|----------------------------------------------------------------------------------------------------------------------------------------------------------------------------------|---------------------------|--------------------------------------|
| Diamond et al (1986), South Africa                         | Primary hyperparathyroidism, A study of 100 patients in Johannesburg                                                                                                             | Case-control              | 100                                  |
| Digenio et al (1991), South Africa                         | The Johannesburg cardiac rehabilitation programme                                                                                                                                | Longitudinal              | 387                                  |
| Dobseu et al (2020), Cameroon                              | Evaluation of hepatic fibrosis in HIV/HCV co-infected individuals in Yaoundé, Cameroon: usefulness of APRI score in resource-constrained settings                                | Cross-sectional           | 97                                   |
| Dotchin et al (2014), Tanzania                             | The association between disability and cognitive impairment in an elderly Tanzanian population                                                                                   | Longitudinal (cohort)     | 296                                  |
| du Rand et al (2001), South Africa                         | Needs of frail elderly people in informal settlements                                                                                                                            | Cross-sectional           | 1200                                 |
| Eales et al (1996), South Africa                           | The exercise capacity of three socio-economic groups of elderly hypertensive patients                                                                                            | Not stated                | 44                                   |
| Eales et al (1997), South Africa                           | A Proposed Field Test for Evaluating Fitness in Elderly Hypertensive Patients                                                                                                    | Cross-sectional           | 44                                   |
| Eduardo et al (2014), Kenya, Mozambique, Rwanda & Tanzania | Characteristics and outcomes among older HIV-positive adults enrolled in HIV programs in four sub-Saharan African countries.                                                     | Longitudinal (cohort)     | HIV care - 392, 131<br>ART - 184,689 |
| Elk et al (1983), South Africa                             | The Coloured elderly in Cape - a psychosocial, psychiatric and medical community survey                                                                                          | Cross-sectional           | 150                                  |
| Enikuomihin et al (2020), Nigeria                          | Influence of gender on the distribution of type 2 diabetic complications at the Obafemi Awolowo teaching hospital, Ile-Ife, Nigeria                                              | Cross-sectional           | 400                                  |
| Eze et al. (2020), Nigeria                                 | Anterior Bladder Wall Thickness, Post-Void Urine Residue, and Bladder Emptying Efficiency as Indicators of Bladder Dysfunction in Nigerian Men with Benign Prostatic Hyperplasia | Cross-sectional           | 77                                   |
| Ezenwa et al (2020), Nigeria                               | Apical Peri-prostatic Nerve Block versus Intra-rectal Xylocaine Gel for Trans-.Rectal Ultrasound Guided Prostate Biopsy among Nigerian Patients: A prospective Randomized Study  | Randomized control trails | 90                                   |
| Faber et al (1992), South Africa                           | Dietary patterns and nutritional status in free-living older white men with established vascular disease                                                                         | Not stated                | 39                                   |
| Fakoya et al (2018), Nigeria                               | Determinants of Quality of Life of Elderly Patients Attending a General Practice Clinic in Southwest Nigeria.                                                                    | Cross-sectional           | 216                                  |
| Fantahun et al (2009), Ethiopia                            | Ageing of a Rural Ethiopian Population: Who Are the Survivors?                                                                                                                   | Longitudinal (cohort)     | 2231                                 |
| Fawale et al (2017), Nigeria                               | Correlates of sleep quality and sleep duration in a sample of urban-dwelling elderly Nigerian women                                                                              | Cross-sectional           | 528                                  |
| Ferrari et al (2013), South Africa                         | Geographical variations in the prevalence and management of cardiovascular risk factors in outpatients with CAD: Data from the contemporary CLARIFY registry                     | Longitudinal (cohort)     | 32,954                               |
| Folorunso et al (2020), Nigeria                            | Age-Related Hearing Loss at Gwagwalada Area Council of Federal Capital Territory, Abuja                                                                                          | Cross-sectional           | 114                                  |

|                                                                            |                                                                                                                                                                                                      |                               |        |
|----------------------------------------------------------------------------|------------------------------------------------------------------------------------------------------------------------------------------------------------------------------------------------------|-------------------------------|--------|
| Forrest et al (2011), South Africa & USA                                   | A prospective, randomized, open-label trial comparing the safety and efficacy of trivalent live attenuated and inactivated influenza vaccines in adults 60 years of age and older                    | Randomized “open label” trial | 3009   |
| Gatimu et al (2016), Ghana                                                 | Prevalence and determinants of diabetes among older adults in Ghana                                                                                                                                  | Cross-sectional               | 5565   |
| Gaziano et al (2017), South Africa                                         | Cardio metabolic risk in a population of older adults with multiple co-morbidities in rural South Africa: the HAALSI (Health and Aging in Africa: Longitudinal studies of INDEPTH communities) study | Longitudinal (cohort)         | 6821   |
| Geerts (2017), South Africa                                                | Neutral zone or conventional mandibular complete dentures: a randomised crossover trial comparing oral health-related quality of life                                                                | Randomized “crossover” trial  | 35     |
| Gildner et al. (2014), China, Ghana, India, Mexico, Russian & South Africa | Sleep duration, sleep quality, and obesity risk among older adults from six middle-income countries: findings from the study on global AGEing and adult health (SAGE).                               | Cross-sectional               | 28,980 |
| Gillis et al (1981), South Africa                                          | Physical and mental incapacity in elderly white persons in Cape Town                                                                                                                                 | Cross-sectional               | 150    |
| Gillis et al (1991), South Africa                                          | Psychological distress and depression in urbanising elderly black persons                                                                                                                            | Cross-sectional               | 365    |
| Gomez-Olivé (2014), South Africa                                           | Sleep problems and mortality in rural South Africa: novel evidence from a low-resource setting.                                                                                                      | Cross-sectional               | 6206   |
| Gómez-Olivé et al (2010), South Africa                                     | Assessing health and well-being among older people in rural South Africa                                                                                                                             | Cross-sectional               | 6206   |
| Gómez-Olivé et al (2013), South Africa                                     | Self-reported health and health care use in an ageing population in the Agincourt sub-district of rural South Africa                                                                                 | Cross-sectional               | 425    |
| Gomez-Olive et al (2014), South Africa                                     | Social conditions and disability related to the mortality of older people in rural South Africa.                                                                                                     | Longitudinal (cohort)         | 4085   |
| Govender et al (2010), South Africa                                        | The Health Status and Unmet Health Needs of Old-Age Pensioners Living in Selected Urban Poor Communities in Cape Town, South Africa                                                                  | Cross-sectional               | 703    |
| Gray et al (2014), Tanzania                                                | Development and Validation of the Identification and Intervention for Dementia in Elderly Africans (IDEA) Study Dementia Screening Instrument                                                        | Longitudinal (cohort)         | 1198   |
| Gray et al (2016), Tanzania                                                | Rates and predictors of three-year mortality in older people in rural Tanzania                                                                                                                       | Longitudinal (cohort)         | 2232   |
| Gray et al (2017), Tanzania                                                | Identifying Frailty and its Outcomes in Older People in Rural Tanzania                                                                                                                               | Longitudinal (cohort)         | 1198   |
| Guerchet (2009), Benin Republic                                            | Cognitive Impairment and Dementia in Elderly People Living in Rural Benin, West Africa                                                                                                               | Cross-sectional               | 502    |



|                                                           |                                                                                                                                                                  |                       |                       |
|-----------------------------------------------------------|------------------------------------------------------------------------------------------------------------------------------------------------------------------|-----------------------|-----------------------|
| Guerchet et al (2010), Central African Republic           | Prevalence of Dementia in Elderly Living in Two Cities of Central Africa: The EDAC Survey                                                                        | Cross-sectional       | 1016                  |
| Guerchet et al (2012), Central African Republic and Congo | Factors Associated with Dementia Among Elderly People Living in Two Cities in Central Africa: The EDAC Multi-center Study                                        | Cross-sectional       | 1016                  |
| Guerchet et al (2013), Central African Republic           | Association Between a Low Ankle–Brachial Index and Dementia in a General Elderly Population in Central Africa (Epidemiology of Dementia in Central Africa Study) | Cross-sectional       | 1055                  |
| Gureje et al (2006), Nigeria                              | Functional Disability in Elderly Nigerians: Results from the Ibadan Study of Aging                                                                               | Cross-sectional       | 2152                  |
| Gureje et al (2006), Nigeria                              | The profile and impact of probable dementia in a sub-Saharan African community: results from the Ibadan Study of Aging                                           | Cross-sectional       | 2152                  |
| Gureje et al (2007), Nigeria                              | Epidemiology of major depressive disorder in elderly Nigerians in the Ibadan Study of Ageing: a community-based survey                                           | Cross-sectional       | 2152                  |
| Gureje et al (2008), Nigeria                              | Depression and disability: comparisons with common physical conditions in the Ibadan study of aging.                                                             | Longitudinal          | 2152                  |
| Gureje et al (2011), Nigeria                              | The Natural History of Insomnia in the Ibadan Study of Ageing                                                                                                    | Longitudinal          | 1696                  |
| Gureje et al (2011), Nigeria                              | Incidence of and risk factors for dementia in the Ibadan study of aging.                                                                                         | Longitudinal (cohort) | 2149 (Follow-up=1408) |
| Gureje et al (2014), Nigeria                              | Profile and Determinants of Successful Aging in the Ibadan Study of Ageing                                                                                       | Longitudinal          | 2149                  |
| Gutierrez et al (2012), Angola                            | Perception of quality of life in an elderly Angolan sample                                                                                                       | Cross-sectional       | 1003                  |
| Gyasi et al (2018), Ghana                                 | Gender, Self-Rated Health and Functional Decline Among Community-Dwelling Older Adults                                                                           | Cross-sectional       | 1200                  |
| Gyasi et al (2019) Ghana                                  | Financial Inclusion, Health-Seeking Behavior, and Health Outcomes Among Older Adults in Ghana                                                                    | Longitudinal          | 1200                  |
| Gyasi et al (2020), Ghana                                 | Association of food insecurity with psychological disorders: Results of a population-based study among older people in Ghana                                     | Cross-sectional       | 1200                  |
| Gyasi et al (2020), Ghana                                 | How do lifestyle choices affect the link between living alone and psychological distress in older age? Results from the AgeHeaPsyWel-HeaSeeB study               | Cross-sectional       | 1200                  |
| Gyasi et al (2020), Ghana                                 | Impact of food insecurity with hunger on mental distress among community-dwelling older adults                                                                   | Cross-sectional       | 1200                  |
| Gyasi et al (2020), Ghana                                 | Multidimensional Social Support and Health Services Utilization Among Noninstitutionalized Older Persons in Ghana                                                | Cross-sectional       | 1200                  |
| Gyasi et al (2020), Ghana                                 | Physical activity and predictors of loneliness in community-dwelling older adults: The role of social connectedness                                              | Cross-sectional       | 1200                  |
| Gyasi et al (2020), Ghana                                 | Risk of Psychological Distress Among Community- Dwelling Older Adults Experiencing Spousal Loss in Ghana                                                         | Cross-sectional       | 1200                  |

|                                          |                                                                                                                                                                                  |                                      |                                   |
|------------------------------------------|----------------------------------------------------------------------------------------------------------------------------------------------------------------------------------|--------------------------------------|-----------------------------------|
| Hao et al (2017), South Africa           | Social participation and perceived depression among elderly population in south Africa                                                                                           | Cross-sectional                      | 422                               |
| Hendrie et al (2013), Nigeria            | Homocysteine levels and dementia risk in Yoruba and African Americans                                                                                                            | Longitudinal (cohort)                | 760                               |
| Heyns et al (2003), South Africa         | Problems with prostate specific antigen screening for prostate cancer in the primary healthcare setting in South Africa                                                          | Not stated                           | 21                                |
| Heyns et al (2011), South Africa         | Prostate cancer among different racial groups in the Western Cape: Presenting features and management                                                                            | Longitudinal (retrospective)         | 901                               |
| Hien (2014), Burkina Faso                | Prevalence and patterns of multi-morbidity among the elderly in Burkina Faso: Cross-sectional                                                                                    | Cross-sectional                      | 389                               |
| Hontelez et al (2011), South Africa      | Ageing with HIV in South Africa                                                                                                                                                  | Cross-sectional (mathematical model) | Not applicable                    |
| Hosegood et al (2005), South Africa      | The impact of adult mortality on the living arrangements of older people in rural South Africa.                                                                                  | Longitudinal                         | 3,657                             |
| Houser et al (2017), DR Congo            | Diabetes and Hypertension in Congolese Church Personnel: An Emerging Epidemic?                                                                                                   | Cross-sectional                      | 670                               |
| Huang et al (2020), Ghana & South Africa | Effect of financial stress on self-reported health and quality of life among older adults in five developing countries: a cross sectional analysis of WHO-SAGE survey            | Cross-sectional                      | Ghana= 1968<br>South Africa= 1924 |
| Hughes et al (2013), South Africa        | The prevalence of traditional herbal medicine use among hypertensives living in South African communities.                                                                       | Cross-sectional                      | 135                               |
| Ibrahim et al (2015), Nigeria            | Direct non-medical costs double the total direct costs to patients undergoing cataract surgery in Zamfara state, Northern Nigeria: a case series.                                | Cross-sectional                      | 104                               |
| Ice et al (2008), Kenya                  | Health and health perceptions among Kenyan grandparents.                                                                                                                         | Longitudinal                         | 287                               |
| Ice et al (2010), Kenya                  | The impact of caregiving on the health and well-being of Kenyan Luo grandparents.                                                                                                | Longitudinal                         | 1072                              |
| Ice et al (2012), Kenya                  | Stress associated with caregiving: An examination of the stress process model among Kenyan Luo elders                                                                            | Longitudinal                         | 640                               |
| Igbokwe et al (2020), Nigeria            | Prevalence of loneliness and association with depressive and anxiety symptoms among retirees in Northcentral Nigeria: a cross-sectional study                                    | Cross-sectional                      | 1099                              |
| Jacobs et al (1984), South Africa        | The coloured elderly in Cape Town--a psychosocial, psychiatric and medical community survey. Part IV. Haematological values.                                                     | Cross-sectional                      | 150                               |
| Jardim et al (2018), South Africa        | Cardiovascular Disease Profile of the Oldest Adults in Rural South Africa: Data from the HAALSI Study (Health and Aging in Africa: Longitudinal Studies of INDEPTH Communities). | Longitudinal                         | 5059                              |

|                                                                  |                                                                                                                                                                                                                                                |                                         |                                                          |
|------------------------------------------------------------------|------------------------------------------------------------------------------------------------------------------------------------------------------------------------------------------------------------------------------------------------|-----------------------------------------|----------------------------------------------------------|
| Jésus et al (2013), Central African Republic & Republic of Congo | Factors associated with nutritional status in elderly living in two cities of central Africa: The EDAC study                                                                                                                                   | Cross-sectional                         | 1016                                                     |
| Joffe et al (1975), South Africa                                 | Metabolic bone disease in the elderly. Biochemical studies in three different racial groups living in South Africa.                                                                                                                            | Cross-sectional                         | 60                                                       |
| Kailemobi et al (2016), Ghana & South Africa                     | Common risk factors and edentulism in adults, aged 50 years and over, in China, Ghana, India and South Africa: results from the WHO Study on global AGEing and adult health (SAGE).                                                            | Cross-sectional                         | China 11,692, Ghana 4093, India 6409 & South Africa 2985 |
| Kalu et al (2019), Nigeria                                       | Knowledge about risk factors for falls and practice about fall prevention in older adults among physiotherapists in Nigeria.                                                                                                                   | Cross-sectional                         | 329                                                      |
| Kalula (2015), South Africa                                      | Prevalence of falls in an urban community-dwelling older population of Cape Town, South Africa                                                                                                                                                 | Cross-sectional                         | 837                                                      |
| Kalula et al (2006), South Africa                                | Management of older patients presenting after a fall - an accident and emergency department audit.                                                                                                                                             | Longitudinal                            | 100                                                      |
| Kalula et al (2010), South Africa                                | Profile and management of patients at a memory clinic.                                                                                                                                                                                         | Longitudinal                            | 305                                                      |
| Kalula et al (2015), South Africa                                | Ethnic differences in rates and causes of falls in an urban community-dwelling older population in South Africa.                                                                                                                               | Longitudinal                            | 837                                                      |
| Kalula et al (2016), South Africa                                | Risk factors for falls in older adults in a South African Urban Community.                                                                                                                                                                     | Longitudinal                            | 837                                                      |
| Kalula et al (2017), South Africa                                | Methodological challenges in a study on falls in an older population of Cape Town, South Africa                                                                                                                                                | Longitudinal                            | 837                                                      |
| Karstaedt et al (2014), South Africa                             | Tuberculosis in older adults in Soweto, South Africa.                                                                                                                                                                                          | Longitudinal (cohort)                   | 110                                                      |
| Kellett-Wright et al (2020), Tanzania                            | Screening for HIV-Associated Neurocognitive Disorder (HAND) in Adults Aged 50 and Over Attending a Government HIV Clinic in Kilimanjaro, Tanzania. Comparison of the International HIV Dementia Scale (IHDS) and IDEA Six Item Dementia Screen | Cross-sectional of a longitudinal study | 253                                                      |
| Kimuna et al (2007), South Africa                                | Older People as Resources in South Africa: Mpumalanga Households                                                                                                                                                                               | Cross-sectional                         | 1002                                                     |
| Kinyanda et al (2016), Uganda                                    | Risk of major depressive disorder among older persons living in HIV-endemic central and southwestern Uganda.                                                                                                                                   | Cross-sectional                         | 471                                                      |
| Klemz et al (2015), South Africa                                 | The effect of altruism on the spending behavior of elderly caregivers of family members with HIV/AIDS in South African townships.                                                                                                              | Cross-sectional                         | 50                                                       |
| Kobayashi et al (2019), South Africa                             | Socioeconomic gradients in chronic disease risk behaviors in a population-based study of older adults in rural South Africa                                                                                                                    | Cross-sectional                         | 5059                                                     |
| Kobayashi et al (2019), South Africa                             | Cognitive Function and Impairment in Older, Rural South African Adults: Evidence From "Health and Aging in Africa: A Longitudinal Study of an INDEPTH Community in Rural South Africa"                                                         | Longitudinal                            | 5059                                                     |
| Kolbe-Alexander et al (2006), South Africa                       | Comparison of two methods of measuring physical activity in South African older adults                                                                                                                                                         | Cross-sectional                         | 122                                                      |

|                                              |                                                                                                                                                                                                                               |                              |                                                                                                      |
|----------------------------------------------|-------------------------------------------------------------------------------------------------------------------------------------------------------------------------------------------------------------------------------|------------------------------|------------------------------------------------------------------------------------------------------|
| Kolbe-Alexander et al (2015), South Africa   | The relationship between the built environment and habitual levels of physical activity in South African older adults: a pilot study.                                                                                         | Cross-sectional              | 44                                                                                                   |
| Koyanagi et al (2019), South Africa          | Food Insecurity Is Associated with Mild Cognitive Impairment among Middle-Aged and Older Adults in South Africa: Findings from a Nationally Representative Survey.                                                            | Cross-sectional              | 3672                                                                                                 |
| Kretchy et al (2020), Ghana                  | The Association between Diabetes-Related Distress and Medication Adherence in Adult Patients with Type 2 Diabetes Mellitus: A Cross-Sectional Study                                                                           | Cross-sectional              | 188                                                                                                  |
| Krige (2010), South Africa                   | Melanoma in black South Africans.                                                                                                                                                                                             | Longitudinal (retrospective) | 63                                                                                                   |
| Kunna et al (2017), China & Ghana            | Measurement and decomposition of socioeconomic inequality in single and multi-morbidity in older adults in China and Ghana: results from the WHO study on global AGEing and adult health (SAGE)                               | Cross-sectional              | 13,177 in China, 4305 in Ghana                                                                       |
| Kyobuntungi (2010), Kenya                    | The health and well-being of older people in Nairobi's slums.                                                                                                                                                                 | Cross-sectional              | 2696                                                                                                 |
| Kyobutungi et al (2009), Kenya               | HIV/AIDS and the health of older people in the slums of Nairobi, Kenya: results from a Cross-sectional survey                                                                                                                 | Cross-sectional              | 2696                                                                                                 |
| Lambert et al (2017), Ghana, India & Russian | Impact of informal caregiving on older adults' physical and mental health in low-income and middle-income countries: a cross-sectional, secondary analysis based on the WHO's Study on global AGEing and adult health (SAGE). | Cross-sectional              | caregivers (Ghana 143; India 490; Russia 270) & non-caregivers (Ghana 4112; India 6001; Russia 3304) |
| Lartey et al (2019), Ghana                   | Rapidly Increasing Prevalence of Overweight and Obesity in Older Ghanaian Adults From 2007-2015: Evidence From WHO-SAGE Waves 1 & 2                                                                                           | Longitudinal                 | 5821                                                                                                 |
| Lasisi et al (2010), Nigeria                 | Tinnitus in the elderly: Profile, correlates, and impact in the Nigerian Study of Ageing.                                                                                                                                     | Longitudinal (cohort)        | 2152                                                                                                 |
| Lasisi et al (2014), Nigeria                 | Prevalence and correlates of dizziness in the Ibadan Study of Ageing                                                                                                                                                          | Longitudinal (cohort)        | 2152                                                                                                 |
| Lazenby et al (2019), Botswana               | Place of death among Botswana's oldest old.                                                                                                                                                                                   | Longitudinal                 | 26594                                                                                                |
| Le Roux et al (2007), South Africa           | Acute extradural haematoma in the elderly.                                                                                                                                                                                    | Longitudinal                 | 3249                                                                                                 |
| Lekpa et al (2013), Senegal                  | Socio-demographic and clinical profile of chronic pain with neuropathic characteristics in sub-Saharan African elderly.                                                                                                       | Cross-sectional              | 549                                                                                                  |
| Lenger et al (1996), South Africa            | Informant questionnaires as screening measures to detect dementia. A pilot study in the South African context.                                                                                                                | Cross-sectional              | 40                                                                                                   |
| Lewis et al (2017), Tanzania                 | Risk factors for delirium in older medical inpatients in Tanzania.                                                                                                                                                            | Cross-sectional              | 510                                                                                                  |
| Longdon et al (2013), Tanzania               | The prevalence of dementia in rural Tanzania: A Cross-sectional community-based study.                                                                                                                                        | Cross-sectional              | 1198                                                                                                 |

|                                            |                                                                                                                                                               |                       |                                                        |
|--------------------------------------------|---------------------------------------------------------------------------------------------------------------------------------------------------------------|-----------------------|--------------------------------------------------------|
| Lowis et al (1997), South Africa           | A comparison of the effects of sacred and secular music on elderly people.                                                                                    | Cross-sectional       | 30                                                     |
| Lwanga et al (2020), Uganda                | Implementing routine physical function screening among elderly HIV-positive patients in Uganda                                                                | Cross-sectional       | 93                                                     |
| Mabaso et al (2016), South Africa          | Knowledge and practices related to diabetes mellitus among adults with diabetes in the Mopani District, Limpopo Province, South Africa                        | Cross-sectional       | 225                                                    |
| Mabeku et al (2020), Cameroon              | Helicobacter pylori infection, a risk factor for Type 2 diabetes mellitus: a hospital-based cross-sectional study among dyspeptic patients in Douala-Cameroon | Cross-sectional       | 187                                                    |
| Macia et al (2012), Senegal                | Prevalence, awareness, treatment and control of hypertension among adults 50 years and older in Dakar, Senegal                                                | Cross-sectional       | 500                                                    |
| Macia et al (2012), Senegal                | Age identity, self-rated health, and life satisfaction among older adults in Dakar, Senegal                                                                   | Cross-sectional       | 500                                                    |
| Macia et al (2015), South Africa           | Exploring life satisfaction among older adults in Dakar.                                                                                                      | Cross-sectional       | 500                                                    |
| Manne-Goehler et al (2019), Uganda         | Depressive symptoms before and after antiretroviral therapy initiation among older-aged individuals in rural Uganda                                           | Longitudinal (cohort) | 154 PLWH and 142 community-based HIV-negative controls |
| Maritz et al (2018), South Africa          | Evaluating several biomarkers as predictors of aortic stiffness in young and older Africans, not consuming alcohol based on self-report.                      | Cross-sectional       | 322                                                    |
| Martinez et al (2012), South Africa        | Quality of life and social engagement of alcohol abstainers and users among older adults in South Africa.                                                     | Cross-sectional       | 3666                                                   |
| Matlho et al (2019), Botswana              | HIV prevalence and related behaviours of older people in Botswana — secondary analysis of the Botswana AIDS Impact Survey (BAIS) IV                           | Cross-sectional       | 970                                                    |
| Mbada et al (2020), Nigeria                | Cross-cultural adaptation and psychometric evaluation of the Yoruba version of the Back beliefs questionnaire among patients with chronic low-back pain       | Cross-sectional       | 119                                                    |
| Mbui et al (2017), Kenya                   | Prescription patterns and adequacy of blood pressure control among adult hypertensive patients in Kenya; findings and implications                            | Cross-sectional       | 271                                                    |
| McKinnon et al (2013), Sub-Saharan African | The relationship of living arrangements and depressive symptoms among older adults in sub-Saharan Africa.                                                     | Cross-sectional       | 12,647                                                 |
| Meiring et al (1983), South Africa         | Identification and definition of the geriatric patient in a teaching hospital.                                                                                | Case control          | 100                                                    |
| Menyanu et al (2017), Ghana & South Africa | Salt Use Behaviours of Ghanaians and South Africans: A Comparative Study of Knowledge, Attitudes and Practices                                                | Longitudinal          | 10,522                                                 |

|                                                       |                                                                                                                                                                                                          |                              |                                  |
|-------------------------------------------------------|----------------------------------------------------------------------------------------------------------------------------------------------------------------------------------------------------------|------------------------------|----------------------------------|
| Mhaka-Mutepfa et al (2014), Uganda                    | Grandparents fostering orphans: Influences of protective factors on their health and well-being.                                                                                                         | Cross-sectional              | 241                              |
| Minicuci et al (2014), Ghana                          | Sociodemographic and socioeconomic patterns of chronic non-communicable disease among the older adult population in Ghana.                                                                               | Cross-sectional              | 4274                             |
| Molete et al (2014), South Africa                     | Oral health needs and barriers to accessing care among the elderly in Johannesburg.                                                                                                                      | Cross-sectional              | 308                              |
| Moreono-Agostino et al (2020), Ghana and South Africa | Are Retired People Higher in Experiential Wellbeing Than Working Older Adults? A Time Use Approach                                                                                                       | Longitudinal                 | Ghana= 2598<br>South Africa=1589 |
| Mtowa et al (2017), Tanzania                          | Socio-demographic inequalities in HIV testing behaviour and HIV prevalence among older adults in rural Tanzania, 2013.                                                                                   | Cross-sectional              | 1643                             |
| Mugisha et al (2015), Uganda                          | Gender perspectives in care provision and care receipt among older people infected and affected by HIV in Uganda                                                                                         | Cross-sectional              | 510                              |
| Mugisha et al (2016), Uganda                          | Chronic disease, risk factors and disability in adults aged 50 and above living with and without HIV: findings from the Wellbeing of Older People Study in Uganda                                        | Cross-sectional              | 471                              |
| Mugisha et al (2016), Uganda                          | Timing of Most Recent Health Care Visit by Older People Living With and Without HIV: Findings From the SAGE Well-Being of Older People Study in Uganda                                                   | Cross-sectional              | 510                              |
| Mugisha et al (2018), Uganda                          | Social engagement and survival in people aged 50 years and over living with HIV and without HIV in Uganda: a prospective cohort study.                                                                   | Cross-sectional              | 510                              |
| Mwanyangala et al (2010), Tanzania                    | Health Status and Quality of Life Among Older Adults in Rural Tanzania                                                                                                                                   | Cross-sectional              | 8206                             |
| Myroniuk (2017), Malawi                               | Marital Dissolutions and the Health of Older Individuals in a Rural African Context                                                                                                                      | Cross-sectional              | 1200                             |
| Namale et al (2020), Uganda                           | Predictors of 30-day and 90-day mortality among hemorrhagic and ischemic stroke patients in urban Uganda: prospective hospital-based cohort study                                                        | Longitudinal (cohort)        | 153                              |
| Nanji et al (2020), Kenya                             | The Muranga Teleophthalmology Study: A Comparison of Virtual (Telere-tina) Assessment with in-person Clinical Examination to Diagnose Diabetic Retinopathy and Age-related Macular Degeneration in Kenya | Not stated                   | 612                              |
| Nash et al (1983), South Africa                       | The coloured elderly in Cape Town - a psychosocial, psychiatric and medical community survey. Part III. A survey of physical disorders and disabilities.                                                 | Cross-sectional              | 149                              |
| Negin et al (2010), Kenya                             | High Rates of AIDS-Related Mortality Among Older Adults in Rural Kenya                                                                                                                                   | Longitudinal (retrospective) | 1228                             |

|                                                                 |                                                                                                                                                           |                       |      |
|-----------------------------------------------------------------|-----------------------------------------------------------------------------------------------------------------------------------------------------------|-----------------------|------|
| Negin et al (2011), Malawi, Rwanda & Tanzania                   | Risk factors for non-communicable diseases among older adults in rural Africa                                                                             | Cross-sectional       | 654  |
| Negin et al (2012), Malawi, Nigeria, Senegal, Rwanda & Tanzania | HIV attitudes, awareness and testing among older adults in Africa.                                                                                        | Cross-sectional       | 2265 |
| Negin et al (2012), South Africa                                | Prevalence of HIV and chronic comorbidities among older adults.                                                                                           | Cross-sectional       | 4227 |
| Negin et al (2016), Uganda                                      | Sexual behaviour of older adults living with HIV in Uganda                                                                                                | Cross-sectional       | 101  |
| Negin et al (2017), South Africa                                | Health expenditure and catastrophic spending among older adults living with HIV.                                                                          | Cross-sectional       | 2872 |
| Njemini et al (2002), Cameroon                                  | The prevalence of autoantibodies in an elderly sub-Saharan African population                                                                             | Cross-sectional       | 331  |
| Njemini et al (2011), Cameroon                                  | Circulating heat shock protein 70 (Hsp70) in elderly members of a rural population from Cameroon: association with infection and nutrition.               | Cross-sectional       | 137  |
| Nwankwo et al (2020), Nigeria                                   | Impact of neoadjuvant chemotherapy in improving operative intervention in the management of cervical cancer in low resource setting: a preliminary report | Pre-post design       | 20   |
| Nyanguru et al (2007), Uganda                                   | Migration and Aging: the Case of Zimbabwe                                                                                                                 | Cross-sectional       | 812  |
| Nyirenda et al (2012), South Africa                             | An investigation of factors associated with the health and well-being of HIV-infected or HIV-affected older people in rural South Africa.                 | Cross-sectional       | 422  |
| Nyirenda et al (2015), Uganda & South Africa                    | Health, wellbeing, and disability among older people infected or affected by HIV in Uganda and South Africa                                               | Longitudinal (cohort) | 932  |
| Obuku et al (2013), Uganda                                      | Determinants of clinician knowledge on aging and HIV/AIDS: a survey of practitioners and policy makers in Kampala District, Uganda.                       | Cross-sectional       | 100  |
| Ogunyemi et al (2018), Nigeria                                  | Health-Related Quality of Life of the Elderly in Institutional Care and Non-Institutional Care in Southwestern Nigeria: A Comparative Study.              | Cross-sectional       | 360  |
| Ojagbemi et al (2013), Nigeria                                  | Suicidal behaviour in old age-result from the Ibadan Study of Ageing                                                                                      | Cross-sectional       | 2149 |
| Ojagbemi et al (2015), Nigeria                                  | Gait speed and cognitive decline over 2 years in the Ibadan study of aging.                                                                               | Longitudinal (cohort) | 2149 |
| Ojagbemi et al (2016), Nigeria                                  | Cognitive Reserve, Incident Dementia, and Associated Mortality in the Ibadan Study of Ageing.                                                             | Longitudinal          | 2149 |
| Ojagbemi et al (2017), Nigeria                                  | Chronic Conditions, New Onset, and Persistent Disability in the Ibadan Study of Aging                                                                     | Longitudinal (cohort) | 2873 |
| Ojagbemi et al (2017), Nigeria                                  | Low Socioeconomic Position, and Mortality in the Ibadan Study of Aging.                                                                                   | Longitudinal (cohort) | 2149 |

|                                       |                                                                                                                                                                                           |                              |      |
|---------------------------------------|-------------------------------------------------------------------------------------------------------------------------------------------------------------------------------------------|------------------------------|------|
| Ojagbemi et al (2018), Nigeria        | Symptomatic and Functional Recovery From Major Depressive Disorder in the Ibadan Study of Ageing.                                                                                         | Longitudinal (cohort)        | 2149 |
| Okoye et al (2020), Nigeria           | Validation of Igbo version of the modified falls efficacy scale among community dwelling older adults: a validation study                                                                 | Cross-sectional              | 109  |
| Okunade et al (2020), Nigeria         | Risk predictors of early recurrence in women with epithelial ovarian cancer in Lagos, Nigeria                                                                                             | Longitudinal (cohort)        | 81   |
| Oladeji et al (2011), Nigeria         | Chronic pain conditions and depression in the Ibadan Study of Ageing.                                                                                                                     | Cross-sectional              | 2152 |
| Olamoyegun et al (2020), Nigeria      | Mobile phone ownership and willingness to receive mHealth services among patients with diabetes mellitus in South-West, Nigeria                                                           | Cross-sectional              | 259  |
| Olatayo et al (2015), Nigeria         | Sexuality in Nigerian Older Adults                                                                                                                                                        | Cross-sectional              | 100  |
| Ologe et al. (2005), Nigeria          | Ear diseases in elderly hospital patients in Nigeria.                                                                                                                                     | Longitudinal (retrospective) | 320  |
| Omenai et al (2020), Nigeria          | Mortality Patterns in Patients with Diabetes Mellitus at a Nigerian Tertiary Hospital: A 10-Year Autopsy Study                                                                            | Cross-sectional              | 1092 |
| Onadja et al (2013), Burkina Faso     | Gender differences in cognitive impairment and mobility disability in old age: A Cross-sectional in Ouagadougou, Burkina Faso                                                             | Cross-sectional              | 918  |
| Onakpoya et al (2020), Nigeria        | Early experience with permanent pacemaker implantation at a tertiary hospital in Nigeria                                                                                                  | Longitudinal (cohort)        | 22   |
| Onakpoya et al (2020), Nigeria        | Intraocular pressure variation after conventional extracapsular cataract extraction, manual small incision cataract surgery and phacoemulsification in an indigenous black population     | Cross-sectional              | 82   |
| Onwubiko et al (2020), Nigeria        | Factors Associated with Depression and Anxiety among Glaucoma Patients in a Tertiary Hospital South-East Nigeria                                                                          | Cross-sectional              | 182  |
| Onwuchewa et al (2009), Nigeria       | Stroke at the University of Port Harcourt Teaching Hospital, Rivers State, Nigeria                                                                                                        | Longitudinal (retrospective) | 202  |
| Osberg et al (2015), Tanzania         | The Hunger of Old Women in Rural Tanzania: can Subjective Data Improve Poverty Measurement?                                                                                               | Not stated                   | 502  |
| Oshi et al (2014), Nigeria            | Profile and Treatment Outcomes of Tuberculosis in the Elderly in South-eastern Nigeria, 2011-2012                                                                                         | Longitudinal (cohort)        | 212  |
| Ottie-Boakye (2020), Ghana            | Coverage of non-receipt of cash transfer (Livelihood Empowerment Against Poverty) and associated factors among older persons in the Mampong Municipality, Ghana – a quantitative analysis | Cross-sectional              | 356  |
| Otitoola et al (2015), South Africa   | Trends in the development of obesity in elderly day care attendees in Sharpeville, South Africa, from 2007-2011.                                                                          | Longitudinal (cohort)        | 208  |
| Padayachey et al (2017), South Africa | Depression in older adults: prevalence and risk factors in a primary health care sample                                                                                                   | Cross-sectional              | 255  |



|                                        |                                                                                                                                                      |                              |                         |
|----------------------------------------|------------------------------------------------------------------------------------------------------------------------------------------------------|------------------------------|-------------------------|
| Paddick et al (2015), Tanzania         | The prevalence and burden of behavioural and psychological symptoms of dementia in rural Tanzania.                                                   | Cross-sectional              | 296                     |
| Paddick et al (2017), Tanzania         | Adaptation and validation of the Alzheimer's Disease Assessment Scale-Cognitive (ADAS-Cog) in a low-literacy setting in sub-Saharan Africa.          | Cross-sectional              | 66                      |
| Paddick et al (2018), Tanzania         | Identification of delirium and dementia in older medical inpatients in Tanzania: A comparison of screening and diagnostic methods.                   | Longitudinal (cohort)        | 507                     |
| Paquissi (2016), Angola                | Prevalence of Peripheral Arterial Disease among Adult Patients Attending Outpatient Clinic at a General Hospital in South Angola                     | Cross-sectional              | 115                     |
| Parag et al (2016), South Africa       | How long are elderly patients followed up with mammography after the diagnosis of breast cancer? A single-centre experience in a developing country. | Longitudinal (retrospective) | 40                      |
| Parmar et al (2014), Ghana and Senegal | Enrolment of older people in social health protection programs in West Africa – Does social exclusion play a part?                                   | Cross-sectional              | Ghana 435, Senegal 2933 |
| Payne et al (2013), Malawi             | Disability Transitions and Health Expectancies among Adults 45 Years and Older in Malawi: A Cohort-Based Model                                       | Longitudinal (cohort)        | 1665                    |
| Payne et al (2017), South Africa       | Physical function in an aging population in rural South Africa: Findings from HAALSI and cross-national comparisons with HRS sister studies.         | Longitudinal                 | 5059                    |
| Payne et al (2017), South Africa       | Prevalence and correlates of frailty in an older rural African population: findings from the HAALSI cohort study                                     | Longitudinal                 | 5059                    |
| Peil et al (1988), Nigeria             | Going home: migration careers of southern Nigerians.                                                                                                 | Cross-sectional              | 1665                    |
| Peltzer (2012), South Africa           | Sociodemographic and health correlates of sleep problems and duration in older adults in South Africa.                                               | Cross-sectional              | 3840                    |
| Peltzer (2017), South Africa           | Differences in Sleep Duration among Four Different Population Groups of Older Adults in South Africa                                                 | Cross-sectional              | 3284                    |
| Peltzer et al (2012), South Africa     | Tobacco use and associated factors in older adults in South Africa.                                                                                  | Cross-sectional              | 3840                    |
| Peltzer et al (2012), South Africa     | Patient experiences and health system responsiveness among older adults in South Africa.                                                             | Cross-sectional              | 3840                    |
| Peltzer et al (2012), South Africa     | Fruit and vegetable intake and associated factors in older adults in South Africa.                                                                   | Cross-sectional              | 3840                    |
| Peltzer et al (2012), South Africa     | Cognitive functioning and associated factors in older adults in South Africa                                                                         | Cross-sectional              | 3840                    |
| Peltzer et al (2013), South Africa     | Problem drinking and associated factors in older adults in South Africa.                                                                             | Cross-sectional              | 2144                    |
| Peltzer et al (2013), South Africa     | Hypertension and associated factors in older adults in South Africa.                                                                                 | Cross-sectional              | 3840                    |
| Peltzer et al (2013), South Africa     | Depression and associated factors in older adults in South Africa.                                                                                   | Cross-sectional              | 3840                    |

|                                                 |                                                                                                                                                                                                             |                              |       |
|-------------------------------------------------|-------------------------------------------------------------------------------------------------------------------------------------------------------------------------------------------------------------|------------------------------|-------|
| Peltzer et al (2013), South Africa              | Arthritis and Associated Factors in Older Adults in South Africa                                                                                                                                            | Cross-sectional              | 3840  |
| Peltzer et al (2014), South Africa              | Breast and Cervical Cancer Screening and Associated Factors among Older Adult Women in South Africa                                                                                                         | Cross-sectional              | 3840  |
| Peltzer et al (2017), South Africa              | Association between Visual Impairment and Low Vision and Sleep Duration and Quality among Older Adults in South Africa.                                                                                     | Cross-sectional              | 3840  |
| Peltzer et al (2018), South Africa              | Self-Reported Sleep Duration and Its Correlates with Socio-demographics, Health Behaviours, Poor Mental Health, and Chronic Conditions in Rural Persons 40 Years and Older in South Africa                  | Cross-sectional              | 6281  |
| Pengpid et al (2019), South Africa              | Sedentary Behaviour and 12 Sleep Problem Indicators Among Middle-Aged and Elderly Adults in South Africa                                                                                                    | Cross-sectional              | 4782  |
| Perold et al (2000), South Africa               | The composition of old age homes in South Africa in relation to the residents and nursing personnel                                                                                                         | Cross-sectional              | 612   |
| Pettifor et al (1978), South Africa             | Seasonal variation in serum 25-hydroxycholecalciferol concentrations in elderly South African patients with fractures of femoral neck.                                                                      | Cross-sectional              | 232   |
| Phaswana-Mafuya (2018), South Africa            | Racial or Ethnic Health Disparities among Older Adults in Four Population Groups in South Africa                                                                                                            | Cross-sectional              | 3284  |
| Phaswana-Mafuya et al (2013), South Africa      | Self-reported prevalence of chronic non-communicable diseases and associated factors among older adults in South Africa                                                                                     | Cross-sectional              | 3840  |
| Phaswana-Mafuya et al (2013), South Africa      | Sociodemographic predictors of multiple non-communicable disease risk factors among older adults in South Africa.                                                                                           | Cross-sectional              | 3,840 |
| Phukubye et al (2011), South Africa             | The incidence and structure of the fabella in a South African cadaver sample.                                                                                                                               | Cross-sectional              | 51    |
| Pieterse et al (2002), Tanzania                 | The association between nutritional status and handgrip strength in older Rwandan refugees                                                                                                                  | Cross-sectional              | 828   |
| Pileron et al (2018), Sub-Saharan Africa        | Cancer incidence in older adults in selected regions of sub-Saharan Africa, 2008–2012                                                                                                                       | Longitudinal (retrospective) | 8944  |
| Pilleron et al (2015), Central African Republic | Is dependent personality disorder associated with mild cognitive impairment and dementia in Central Africa? A result from the EPIDEMCA programme.                                                           | Cross-sectional              | 2002  |
| Pilleron et al (2015), Central African Republic | Association between stressful life events and cognitive disorders in Central Africa: Results from the EPIDEMCA program.                                                                                     | Cross-sectional              | 2002  |
| Pilleron et al (2015), Central African Republic | Association between mild cognitive impairment and dementia and undernutrition among elderly people in Central Africa: some results from the EPIDEMCA (Epidemiology of Dementia in Central Africa) programme | Cross-sectional              | 2002  |
| Pilleron et al (2017), Central African Republic | Prevalence, awareness, treatment, and control of hypertension in older people in Central Africa: the EPIDEMCA study                                                                                         | Cross-sectional              | 2113  |

|                                     |                                                                                                                                                                                                                                 |                       |       |
|-------------------------------------|---------------------------------------------------------------------------------------------------------------------------------------------------------------------------------------------------------------------------------|-----------------------|-------|
| Prinsloo et al (1991), South Africa | Health services--needs of the elderly in two black urban areas of the Cape Peninsula.                                                                                                                                           | Cross-sectional       | 365   |
| Puckree et al (1997), South Africa  | An evaluation of the functional status of the residents of a geriatric residential facility in South Africa.                                                                                                                    | Cross-sectional       | 101   |
| Puckree et al (2002), South Africa  | African traditional healers: what health care professionals need to know                                                                                                                                                        | Cross-sectional       | 330   |
| Puckree et al (2014), South Africa  | Effectiveness of a community based programme of physiotherapy on stability, balance and function of stroke patients                                                                                                             | Longitudinal (cohort) | 25    |
| Pupwe et al (2020), South Africa    | Chemotherapy for elderly colorectal cancer patients at a tertiary hospital in South Africa                                                                                                                                      | Longitudinal (cohort) | 50    |
| Putnam et al (2018), Tanzania       | Hypertension in a resource-limited setting: Is it associated with end organ damage in older adults in rural Tanzania?                                                                                                           | Longitudinal          | 246   |
| Raal et al (2011), South Africa     | CEPHEUS SA: a South African survey on the under-treatment of hypercholesterolemia.                                                                                                                                              | Cross-sectional       | 3001  |
| Raal et al (2013), South Africa     | Prevalence of dyslipidaemia in statin-treated patients in South Africa: results of the Dyslipidaemia International Study (DYSIS).                                                                                               | Cross-sectional       | 1029  |
| Rabie et al (2016), South Africa    | Relation of socio-economic status to the independent application of self-care in older persons of South Africa                                                                                                                  | Cross-sectional       | 198   |
| Ralston et al (2015), South Africa  | Who Benefits - Or Does not - From South Africa's Old Age Pension? Evidence from Characteristics of Rural Pensioners and Non-Pensioners.                                                                                         | Cross-sectional       | 4915  |
| Ralston et al (2018), South Africa  | The Role of Older Persons' Environment in Aging Well: Quality of Life, Illness, and Community Context in South Africa                                                                                                           | Cross-sectional       | 2,937 |
| Ralston et al (2019), South Africa  | Policy Shift: South Africa's Old Age Pensions' Influence on Perceived Quality of Life                                                                                                                                           | Longitudinal          | 6025  |
| Ramjeeth et al (2008), South Africa | The evaluation of low-density lipoprotein cholesterol goals achieved in patients with established cardiovascular disease and/or hyperlipidaemia receiving lipid-lowering therapy: the South African Not at Goal study (SA-NAG). | Cross-sectional       | 1201  |
| Ramlagan et al (2013), South Africa | Social capital and health among older adults in South Africa.                                                                                                                                                                   | Cross-sectional       | 3840  |
| Ramlagan et al (2014), South Africa | Hand grip strength and associated factors in non-institutionalised men and women 50 years and older in South Africa.                                                                                                            | Cross-sectional       | 3840  |
| Ramlall et al (2014), South Africa  | Sensitivity and specificity of neuropsychological tests for dementia and mild cognitive impairment in a sample of residential elderly in South Africa.                                                                          | Longitudinal          | 302   |
| Ramocho et al (2017), South Africa  | Quality of life and physical activity among older adults living in institutions compared to the community                                                                                                                       | Cross-sectional       | 80    |

|                                         |                                                                                                                                                                                        |                              |                |
|-----------------------------------------|----------------------------------------------------------------------------------------------------------------------------------------------------------------------------------------|------------------------------|----------------|
| Rand et al (2015), South Africa         | Predicting daily use of the affected upper extremity 1 year after stroke.                                                                                                              | Longitudinal                 | 125            |
| Randall et al (2016), African countries | The quality of demographic data on older Africans                                                                                                                                      | Cross-sectional              | Not applicable |
| Rangel et al (2015), South Africa       | Mortality after emergency surgery continues to rise after discharge in the elderly: Predictors of 1-year mortality.                                                                    | Longitudinal (retrospective) | 390            |
| Ranjith et al (2017), South Africa      | Association Between Hyperuricemia and Major Adverse Cardiac Events in Patients with Acute Myocardial Infarction.                                                                       | Longitudinal (retrospective) | 2683           |
| Rayner et al (2007), South Africa       | A survey of hypertensive practices at two community health centres in Cape Town.                                                                                                       | Cross-sectional              | 161            |
| Rayner et al (2012), South Africa       | G-protein-coupled receptor kinase 4 polymorphisms predict blood pressure response to dietary modification in Black patients with mild-to-moderate hypertension.                        | Randomized Control Trials    | 40             |
| Reddy et al (1985), South Africa        | Prevalence and severity of periodontitis in a high fluoride area in South Africa.                                                                                                      | Cross-sectional              | 71             |
| Reiger et al (2017), South Africa       | Awareness, treatment, and control of dyslipidaemia in rural South Africa: The HAALSI (Health and Aging in Africa: A Longitudinal Study of an INDEPTH Community in South Africa) study. | Longitudinal                 | 5059           |
| Resnikoff (1988), Chad                  | Epidemiology of Bietti's keratopathy. Study of risk factors in Central Africa (Chad)                                                                                                   | Cross-sectional              | 3,241          |
| Rishworth et al (2020), Uganda          | Getting Old Well in Sub Saharan Africa: Exploring the Social and Structural Drivers of Subjective Wellbeing among Elderly Men and Women in Uganda                                      | Longitudinal                 | 470            |
| Robb et al (2017), South Africa         | Malnutrition in the elderly residing in long-term care facilities: a Cross-sectional survey using the Mini Nutritional Assessment (MNA (R)) screening tool                             | Cross-sectional              | 124            |
| Rodriguez et al (2002), South Africa    | Depression and social support in the elderly population: a study of rural South African elders.                                                                                        | Cross-sectional              | Not stated     |
| Rohr et al (2017), South Africa         | Performance of self-reported HIV status in determining true HIV status among older adults in rural South Africa: a validation study                                                    | Longitudinal                 | 5059           |
| Rosenberg et al (2020) South Africa     | The relationships between cognitive function, literacy and HIV status knowledge among older adults in rural South Africa                                                               | Longitudinal                 | 5059           |
| Rossouw et al (2017), South Africa      | A Comparable Yardstick: Adjusting for Education Bias in South African Health System Responsiveness Ratings                                                                             | Cross-sectional              | 1846           |
| Rotchford et al (2000), South Africa    | Rapid assessment of cataract surgical coverage in rural Zululand.                                                                                                                      | Cross-sectional              | 562            |
| Rotchford et al (2002), South Africa    | Glaucoma in Zulus: a population-based Cross-sectional survey in a rural district in South Africa.                                                                                      | Cross-sectional              | 1115           |
| Rotchford et al (2003), South Africa    | Temba glaucoma study: a population-based Cross-sectional survey in urban South Africa.                                                                                                 | Cross-sectional              | 1120           |

|                                         |                                                                                                                                                                    |                              |                                                 |
|-----------------------------------------|--------------------------------------------------------------------------------------------------------------------------------------------------------------------|------------------------------|-------------------------------------------------|
| Rotchford et al (2003), South Africa    | Exfoliation syndrome in black South Africans.                                                                                                                      | Cross-sectional              | 1840                                            |
| Saeed et al (2016), Ghana               | Effect of socio-economic factors in utilization of different healthcare services among older adult men and women in Ghana                                          | Cross-sectional              | 5573                                            |
| Sanuade (2019), Ghana                   | Prevalence and correlates of stroke among older adults in Ghana: Evidence from the Study on Global AGEing and adult health (SAGE).                                 | Cross-sectional              | 4,279                                           |
| Sanya et al (2011), Nigeria             | Profile and Causes of Mortality Among Elderly Patients Seen in a Tertiary Care Hospital in Nigeria                                                                 | Longitudinal (cohort)        | 297                                             |
| Sarfo et al (2020), Ghana               | Risk Factor Control in Stroke Survivors with Diagnosed and Undiagnosed Diabetes: A Ghanaian Registry Analysis                                                      | Cross-sectional              | 101                                             |
| Sarkodie et al (2020), Ghana            | Percutaneous transhepatic biliary stent placement in the palliative management of malignant obstructive jaundice: initial experience in a tertiary center in Ghana | Not stated                   | 23                                              |
| Schatz et al (2012), South Africa       | The impact of pensions on health and wellbeing in rural South Africa: Does gender matter?                                                                          | Cross-sectional              | 4085                                            |
| Schatz et al et al (2015), South Africa | Dependent or Productive? A New Approach to Understanding the Social Positioning of Older South Africans Through Living Arrangements                                | Cross-sectional              | 2000 (N= 7518); 2005 (N= 8167); 2010 (N= 10192) |
| Schatz et al et al (2018), South Africa | Living Arrangements, Disability and Gender of Older Adults Among Rural South Africa.                                                                               | Longitudinal                 | 5809                                            |
| Schmidlin et al (2018), South African   | Facial ageing in South African adult males                                                                                                                         | Cross-sectional              | 189                                             |
| Schnaid et al (2000), South Africa      | Fractured neck of femur in black patients: a prospective study.                                                                                                    | Case control                 | 72                                              |
| Schoeman et al (1996), South Africa     | Squamous cell carcinoma in neuropathic plantar ulcers in leprosy: another example of Marjolin's ulcer                                                              | Case control series          | 7                                               |
| Scholten et al (2011), Uganda           | Health and functional status among older people with HIV/AIDS in Uganda                                                                                            | Cross-sectional              | 510                                             |
| Segal et al (1980), South Africa        | Hiatus hernia in Johannesburg blacks.                                                                                                                              | Not stated                   | 1092                                            |
| Segal et al (1982), South Africa        | Diverticular disease in urban Africans in South Africa.                                                                                                            | Not stated                   | 1048                                            |
| Segal et al (1988), South Africa        | Factors associated with oesophageal cancer in Soweto, South Africa.                                                                                                | Case control                 | 200 - cases, 391 - control                      |
| Silbert et al (1977), South Africa      | Medical and psychosocial problems of the aged.                                                                                                                     | Not stated                   | 49347                                           |
| Simo et al (2020), Cameroon             | Correlates of diabetic polyneuropathy of the elderly in Sub-Saharan Africa                                                                                         | Cross-sectional              | 159                                             |
| Sissolak et al (2013), South Africa     | Tissue microarray in a subset of South African patients with DLBCL.                                                                                                | Longitudinal (retrospective) | 93                                              |
| Skidmore et al (2015), South Africa     | Strategy Training During Inpatient Rehabilitation May Prevent Apathy Symptoms After Acute Stroke.                                                                  | Randomised Controlled Trial  | 30                                              |

|                                              |                                                                                                                                                                                                 |                              |                                                                              |
|----------------------------------------------|-------------------------------------------------------------------------------------------------------------------------------------------------------------------------------------------------|------------------------------|------------------------------------------------------------------------------|
| Sliwa et al (2010), South Africa             | Predisposing factors and incidence of newly diagnosed atrial fibrillation in an urban African community: insights from the Heart of Soweto Study                                                | Longitudinal (cohort)        | 246                                                                          |
| Smith et al (2005), South Africa             | Current patient perceptions on the menopause: a South African perspective.                                                                                                                      | Cross-sectional              | 541                                                                          |
| Solomon et al (1982), South Africa           | Osteoarthritis of the hip: the patient behind the disease.                                                                                                                                      | Cross-sectional              | 105 - advanced OA, 100 - femoral neck acute fracture, 176 normal individuals |
| Solomon et al (2005), South Africa           | The need for tighter rheumatoid arthritis control in a South African public health care center.                                                                                                 | Longitudinal (cohort)        | 359                                                                          |
| Solomon et al (2011), South Africa           | Burden of depressive symptoms in South African public healthcare patients with established rheumatoid arthritis: a case-control study.                                                          | Case-control                 | 643                                                                          |
| Solomons (1984), South Africa                | Malignant mesothelioma--clinical and epidemiological features. A report of 80 cases.                                                                                                            | Longitudinal (retrospective) | 80 - study group, 546 - reference group                                      |
| Somdyala et al (2010), South Africa          | Cancer incidence in a rural population of South Africa, 1998-2002.                                                                                                                              | Not stated                   | 2501                                                                         |
| Ssonko et al (2018), Uganda                  | Polypharmacy among HIV positive older adults on anti-retroviral therapy attending an urban clinic in Uganda                                                                                     | Cross-sectional              | 412                                                                          |
| Surka et al (2001), South Africa             | Outcome of high-volume cataract surgery at an academic hospital                                                                                                                                 | Not stated                   | 98                                                                           |
| Swart et al (2014), South Africa             | Early Loading of Mandibular Implants Placed Immediately After Extraction: A 10-year Prospective Study of Eight Patients                                                                         | Longitudinal                 | 8                                                                            |
| Tannor et al (2017), South Africa            | Quality of life in patients on chronic dialysis in South Africa: a comparative mixed methods study.                                                                                             | Cross-sectional              | 128                                                                          |
| Tarekegne et al (2018), Ghana & South Africa | Sociodemographic and behavioral characteristics associated with self-reported diagnosed diabetes mellitus in adults aged 50+ years in Ghana and South Africa: results from the WHO-SAGE wave 1. | Cross-sectional              | Ghana 4732, South Africa 3842                                                |
| Till et al (1999), South Africa              | Experience in a hospital-based clinic as part of chiropractic undergraduate training                                                                                                            | Cross-sectional              | 262                                                                          |
| Tipping et al (2006), South Africa           | The burden and risk factors for adverse drug events in older patients--a prospective Cross-sectional.                                                                                           | Cross-sectional              | 517                                                                          |
| Togonu-Bickersteth (1986), Nigeria           | Age Identification Among Yoruba Aged                                                                                                                                                            | Not stated                   | 603                                                                          |
| Tolani et al (2020), Nigeria                 | Acute urinary tract infection in patients with underlying benign prostatic hyperplasia and prostate cancer                                                                                      | Cross-sectional              | 166                                                                          |
| Tomás et al (2012), Angola                   | Predicting perceived health in Angolan elderly: The moderator effect of being oldest old                                                                                                        | Cross-sectional              | 1003                                                                         |
| Tomita et al (2013), South Africa            | Depression, disability and functional status among community-dwelling older adults in South Africa: evidence from the first South African National Income Dynamics Study                        | Longitudinal (panel survey)  | 1429                                                                         |

|                                          |                                                                                                                                                                                             |                              |            |
|------------------------------------------|---------------------------------------------------------------------------------------------------------------------------------------------------------------------------------------------|------------------------------|------------|
| Torgersen et al (2019), Botswana         | Impact of Efavirenz Metabolism on Loss to Care in Older HIV+ Africans                                                                                                                       | Longitudinal (cohort)        | 941        |
| Toure et al (2009), Senegal              | Risk factors for dementia in a Senegalese elderly population.                                                                                                                               | Cross-sectional              | 507        |
| Udjo et al (2006), South Africa          | Demographic impact of HIV/AIDS on the young and elderly populations in South Africa.                                                                                                        | Longitudinal (cohort)        | Not stated |
| Uwakwe et al (2009), Nigeria             | The epidemiology of dependence in older people in Nigeria: prevalence, determinants, informal care, and health service utilization. A 10/66 dementia research group Cross-sectional survey. | Cross-sectional              | 1238       |
| Uys et al (1990), South Africa           | Standards for the nursing care of the frail aged                                                                                                                                            | Not stated                   | 52         |
| Van Biljon et al (2015), South Africa    | A partial validation of the WHOQOL-OLD in a sample of older people in South Africa.                                                                                                         | Cross-sectional              | 176        |
| van der Pas et al (2015), South Africa   | Features of home and neighbourhood and the liveability of older South Africans                                                                                                              | Cross-sectional              | 1008       |
| van der Weilen et al (2018), Ghana       | Universal health coverage in the context of population ageing: What determines health insurance enrolment in rural Ghana?                                                                   | Longitudinal                 | 5846       |
| van Rensburg et al (2017), South Africa  | An elderly, urban population: Their experiences and expectations of pharmaceutical services in community pharmacies                                                                         | Cross-sectional              | 67         |
| Van Staden et al (2007), South Africa    | Profile of the geriatric patient hospitalised at Universitas Hospital, South Africa.                                                                                                        | Longitudinal (retrospective) | 791        |
| van Vuuren et al (2009), South Africa    | Effectiveness of influenza vaccination in the elderly in South Africa.                                                                                                                      | Case-control                 | 45522      |
| van Wyk et al (1977), South Africa       | Oral health status of institutionalized elderly Cape Coloreds from the Cape Peninsula of South Africa.                                                                                      | Not stated                   | 585        |
| van Wyk et al (1977), South Africa       | Tooth survival in institutionalized elderly Cape Coloreds from the Cape Peninsula of South Africa.                                                                                          | Not stated                   | 585        |
| Vlantis et al (2003), South Africa       | Conversion from a non-indwelling to a PROVOX 2 indwelling voice prosthesis for speech rehabilitation: comparison of voice quality and patient preference                                    | Longitudinal                 | 17         |
| von Klemperer et al (2014), South Africa | Thrombolysis risk prediction: applying the SITS-SICH and SEDAN scores in South African patients.                                                                                            | Longitudinal                 | 41         |
| Vorobiof et al (2004), South Africa      | First line therapy with paclitaxel (Taxol) and pegylated liposomal doxorubicin (Caelyx) in patients with metastatic breast cancer: a multicentre phase II study.                            | Randomized Control Trials    | 34         |
| Vorster et al (2015), South Africa       | Fluorine-18-fluoroethylcholine PET/CT in the detection of prostate cancer: a South African experience.                                                                                      | Longitudinal (retrospective) | 50         |
| Wachira et al (2015), Kenya              | Characterization of in-hospital cardiac arrest in adult patients at a tertiary hospital in Kenya                                                                                            | Longitudinal (retrospective) | 128        |

|                                       |                                                                                                                                               |                              |              |
|---------------------------------------|-----------------------------------------------------------------------------------------------------------------------------------------------|------------------------------|--------------|
| Walker et al (1986), South Africa     | Survival of black men with prostatic cancer in Soweto, Johannesburg, South Africa.                                                            | Longitudinal (retrospective) | 160          |
| Walker et al (1989), South Africa     | Risk factors and survival from colorectal cancer in black patients in Soweto, South Africa.                                                   | Randomized Control Trials    | 42           |
| Walker et al (1989), South Africa     | Prevalence of gallstones in elderly black women in Soweto, Johannesburg, as assessed by ultrasound.                                           | Not stated                   | 100          |
| Walker et al (1990), South Africa     | Obesity in indigent elderly rural African women: effects on hypertension, hyperlipidaemia and hyperglycaemia.                                 | Randomized Control Trials    | 90           |
| Walker et al (1991), South Africa     | Serum albumin levels in elderly rural Africans.                                                                                               | Longitudinal                 | 100          |
| Walker et al (1992), South Africa     | Case-control study of prostate cancer in black patients in Soweto, South Africa.                                                              | Case control                 | 166          |
| Walker et al (2005), South Africa     | Lung cancer in Africans in a South African city population in transition.                                                                     | Longitudinal (retrospective) | 381          |
| Wallrauch et al (2010), South Africa  | HIV prevalence and incidence in people 50 years and older in rural South Africa.                                                              | Longitudinal                 | Not reported |
| Wandera et al (2014), Uganda          | Prevalence and correlates of disability among older Ugandans: evidence from the Uganda National Household Survey                              | Not stated                   | 2628         |
| Wandera et al (2015), Uganda          | Factors associated with self-reported ill health among older Ugandans: A Cross-sectional study                                                | Cross-sectional              | 2382         |
| Wandera, et al (2015), Uganda         | Prevalence and risk factors for self-reported non-communicable diseases among older Ugandans: a Cross-sectional                               | Cross-sectional              | 2382         |
| Ware et al (2017), South Africa       | Associations between dietary salt, potassium and blood pressure in South African adults: WHO SAGE Wave 2 Salt & Tobacco                       | Longitudinal                 | 2928         |
| Wasserman et al (2007), South Africa  | Conservative management of breast cancer in the elderly in a developing country.                                                              | Longitudinal (retrospective) | 483          |
| Wasserman et al (2009), South Africa  | Community-based care of stroke patients in a rural African setting.                                                                           | Longitudinal                 | 30           |
| Wasserman et al (2012), South Africa  | Early outcomes of thrombolysis for acute ischaemic stroke in a South African tertiary care centre.                                            | Longitudinal                 | 42           |
| Waterhouse et al (2017), South Africa | The impact of multi-morbidity on disability among older adults in South Africa: do hypertension and socio-demographic characteristics matter? | Longitudinal                 | 3842         |
| Watkins et al (2014), South Africa    | PT321 Economic consequences of cardiovascular disease in South African households: An analysis of the WHO Study on Global Aging (SAGE).       | Longitudinal                 | 4895         |
| Webb et al (2015), South Africa       | Diabetes care and complications in primary care in the Tshwane district of South Africa.                                                      | Randomized Control Trials    | 599          |
| Wentink et al (2010), South Africa    | Incidence and histological features of colorectal cancer in the Northern Cape Province, South Africa.                                         | Longitudinal (retrospective) | 206          |



|                                      |                                                                                                                                                                                               |                              |      |
|--------------------------------------|-----------------------------------------------------------------------------------------------------------------------------------------------------------------------------------------------|------------------------------|------|
| Werfalli et al (2018), South Africa  | Diabetes in South African older adults: prevalence and impact on quality of life and functional disability - as assessed using SAGE Wave 1 data.                                              | Cross-sectional              | 3836 |
| Wessels et al (2012), South Africa   | DVT prophylaxis in relation to patient risk profiling - TUNE-IN study.                                                                                                                        | Cross-sectional              | 608  |
| Westaway (2010), South Africa        | Effects of ageing, chronic disease and co-morbidity on the health and well-being of older residents of Greater Tshwane.                                                                       | Cross-sectional              | 710  |
| Westaway et al (2001), South Africa  | The effect of type 2 diabetes mellitus on health-related quality of life (HRQOL).                                                                                                             | Longitudinal                 | 487  |
| Westaway et al (2007), South Africa  | Which personal quality of life domains affect the happiness of older South Africans?                                                                                                          | Longitudinal                 | 854  |
| Westaway et al (2010), South Africa  | The impact of chronic diseases on the health and well-being of South Africans in early and later old age                                                                                      | Longitudinal                 | 710  |
| Westaway et al (2015), South Africa  | Investigating the psychometric properties of the Rosenberg Self-Esteem scale for South African residents of Greater Pretoria.                                                                 | Longitudinal                 | 1158 |
| Whigham et al (2011), South Africa   | Myocilin mutations in black South Africans with POAG.                                                                                                                                         | Randomized Control Trials    | 244  |
| Whitelaw et al (1992), South Africa  | Community-acquired bacteremia in the elderly: a prospective study of 121 cases.                                                                                                               | Longitudinal (retrospective) | 121  |
| Whitelaw et al (1994), South Africa  | Post-discharge follow-up of stroke patients at Groote Schuur Hospital - a prospective study.                                                                                                  | Cross-sectional              | 70   |
| Whittaker et al (1991), South Africa | Frail aged persons residing in South African homes for the aged who require hospitalisation. Part I. Urban areas.                                                                             | Longitudinal                 | 9032 |
| Williams et al (2010), South Africa  | Major LOXL1 risk allele is reversed in exfoliation glaucoma in a black South African population.                                                                                              | Randomized Control Trials    | 150  |
| Williams et al (2015), South Africa  | MYOC mutations in black south African patients with primary open-angle glaucoma: genetic testing and cascade screening.                                                                       | Cross-sectional              | 472  |
| Wilunda (2015), Kenya                | Health and ageing in Nairobi's informal settlements-evidence from the International Network for the Demographic Evaluation of Populations and Their Health (INDEPTH): a Cross-sectional study | Cross-sectional              | 1878 |
| Wolff (1979), South Africa           | Health needs of geriatric patients discharged from hospital.                                                                                                                                  | Cross-sectional              | 500  |
| Wood et al (2007), South Africa      | A single unit lymphoma experience: outcome in a Cape Town academic centre.                                                                                                                    | Longitudinal (retrospective) | 253  |
| Yawson (2013), Ghana                 | Tobacco use in older adults in Ghana: sociodemographic characteristics, health risks and subjective wellbeing                                                                                 | Longitudinal                 | 4305 |
| Yawson (2014), Ghana                 | Self-reported Cataracts in Older Adults in Ghana: Sociodemographic and Health Related Factors                                                                                                 | Longitudinal                 | 4278 |
| Yorston et al (2002), Kenya          | Does prospective monitoring improve cataract surgery outcomes in Africa?                                                                                                                      | Longitudinal                 | 1845 |

|                                    |                                                                                                                                                                                     |                              |                                              |
|------------------------------------|-------------------------------------------------------------------------------------------------------------------------------------------------------------------------------------|------------------------------|----------------------------------------------|
| Zengin et al (2017), Gambia        | The Gambian Bone and Muscle Ageing Study: Baseline Data from a Prospective Observational African Sub-Saharan Study                                                                  | Longitudinal                 | 488                                          |
| Zengin et al (2018), Gambia        | The prevalence of sarcopenia and relationships between muscle and bone in ageing West-African Gambian men and women                                                                 | Longitudinal                 | 488                                          |
| Zimmer (2005), Sub-Saharan Africa  | Older adults in sub-Saharan Africa living with children and grandchildren.                                                                                                          | Cross-sectional              | 50879                                        |
| Zwi et al (1989), South Africa     | Mesothelioma in South Africa, 1976-84: incidence and case characteristics.                                                                                                          | Longitudinal (retrospective) | 1347                                         |
| <b>QUALITATIVE STUDIES (n=71)</b>  |                                                                                                                                                                                     |                              |                                              |
| Aboderin (2004), Ghana             | Decline in Material Family Support for Older People in Urban Ghana, Africa: Understanding Processes and Causes of Change.                                                           | Interpretive exploratory     | 51                                           |
| Adam & Koranteng, (2020), Ghana    | Availability, accessibility, and impact of social support on breast cancer treatment among breast cancer patients in Kumasi, Ghana: A qualitative study                             | Phenomenological             | 15                                           |
| Adandom et al (2020), Nigeria      | Managing psycho-social-cognitive factors during hip/knee fracture rehabilitation for older adults: clinicians' experiences                                                          | Interpretive description     | 15                                           |
| Adinkrah (2020), Ghana             | Grannicides in Ghana: a study of lethal violence by grandchildren against grandmothers                                                                                              | Exploratory                  | NA (document analysis)                       |
| Agunbiade et al (2012), Nigeria    | Ageing, Sexuality and Enhancement Among Yoruba People in South Western Nigeria                                                                                                      | Not stated                   | 64 - individual interview, 100 - focus group |
| Agunbiade et al (2017), Nigeria    | Neoliberalism and resilience among older Yoruba people in a semi-urban community, South West Nigeria.                                                                               | Narrative research           | 37                                           |
| Agyemang-Duah et al (2020), Ghana  | Dynamics of health information-seeking behaviour among older adults with very low incomes in Ghana: a qualitative study                                                             | Not stated                   | 60                                           |
| Alidu et al (2000), Ghana          | 'What a dog will see and kill, a cat will see and ignore it': An exploration of health-related help-seeking among older Ghanaian men residing in Ghana and the United Kingdom       | Not stated                   | 26                                           |
| Akinrolie et al (2020), Nigeria    | Intergenerational Support between Older Adults and Adult Children in Nigeria: The Role of Reciprocity                                                                               | Phenomenological             | 18                                           |
| Amod et al (2005), South Africa    | Ventriculitis due to a hetero strain of vancomycin intermediate Staphylococcus aureus (hVISA): successful treatment with linezolid in combination with intraventricular vancomycin. | Not stated                   | 1                                            |
| Angotti et al (2018), South Africa | Taking care' in the age of AIDS: older rural South Africans' strategies for surviving the HIV epidemic                                                                              | Grounded theory              | 77                                           |
| Bayuo (2017), Ghana                | Experiences with out-patient hospital service utilisation among older persons in the Asante Akyem North District- Ghana                                                             | Not stated                   | 16                                           |

|                                         |                                                                                                                                                                |                          |    |
|-----------------------------------------|----------------------------------------------------------------------------------------------------------------------------------------------------------------|--------------------------|----|
| Bohman et al (2007), South Africa       | We clean our houses, prepare for weddings and go to funerals: daily lives of elderly Africans in Majaneng, South Africa.                                       | Ethnography              | 16 |
| Bohman et al (2009), South Africa       | Tradition in transition intergenerational relations with focus on the aged and their family members in a South African context.                                | Ethnography              | 29 |
| Bohman et al (2011), South Africa       | South Africans' Experiences of Being Old and of Care and Caring in a Transitional Period                                                                       | Ethnography              | 16 |
| Bohman et al (2014), South Africa       | Existing and Evolving in Two Minds: Beliefs in Relation to Health and Illness Expressed by Older South Africans                                                | Ethnography              | 16 |
| Brown (2015), Ghana                     | Elderly caregiving in Ghana: An exploration of family caregivers' perceptions.                                                                                 | Phenomenology            | 20 |
| Cadmus et al (2012), Nigeria            | Older Persons' Views and Experience of Elder Abuse in South Western Nigeria: A Community-Based Qualitative Survey                                              | Grounded theory          | 64 |
| de Klerk et al (2017), South Africa     | "A Body Like a Baby": Social Self-Care among Older People with Chronic HIV in Mombasa                                                                          | Ethnography              | 8  |
| Diaemeta et al (2018), Nigeria          | The Burden Experience of Formal and Informal Caregivers of Older Adults With Hip Fracture in Nigeria                                                           | Phenomenology            | 17 |
| Golaz et al (2015), Uganda              | Understanding the vulnerability of older adults: Extent of and breaches in support systems in Uganda                                                           | Qualitative description  | 83 |
| Hien et al (2016), Burkina Faso         | Point of view of older adults on the potentially inappropriate medications prescribing in primary care facilities in Bobo-Dioulasso, Burkina Faso              | Qualitative description  | -  |
| Jingi et al (2017), Cameroon            | A case management of hypertension in the elderly in sub-Sahara Africa: lessons from Granny.                                                                    | Qualitative description  | 1  |
| Kakongi et al (2020), Uganda            | Exploring pathways to Hospital Care for Patients with Alzheimer's disease and related dementias in rural South Western Uganda                                  | Descriptive              | 24 |
| Kerr et al (2004), South Africa         | Factors that influence retirement self-actualisation                                                                                                           | Phenomenology            | 24 |
| Kiplagat et al (2019), Kenya            | Challenges with seeking HIV care services: perspectives of older adults infected with HIV in western Kenya                                                     | Descriptive qualitative  | 57 |
| Knight et al (2018), South Africa       | "I attend at Vanguard and I attend here as well": barriers to accessing healthcare services among older South Africans with HIV and non-communicable diseases. | Interpretive exploratory | 10 |
| Kuteesa et al (2012), Uganda            | Older people living with HIV in Uganda: Understanding their experience and needs.                                                                              | Qualitative description  | 40 |
| Lekalakala-Mokgele (2014), South Africa | Understanding of the risk of HIV infection among the elderly in Ga-Rankuwa, South Africa.                                                                      | Not stated               | 32 |
| Lekalakala-Mokgele (2016), South Africa | Exploring gender perceptions of risk of HIV infection and related behaviour among elderly men and women of Ga-Rankuwa, Gauteng Province, South Africa.         | Not stated               | 32 |

|                                    |                                                                                                                                             |                            |    |
|------------------------------------|---------------------------------------------------------------------------------------------------------------------------------------------|----------------------------|----|
| Leuning et al (2000), South Africa | Meanings and Expressions of Care and Caring for Elders in Urban Namibian Families: A Transcultural Nursing Study                            | Ethnography                | 18 |
| Lopes Ibanez-Gonzalez et al (2015) | Clinics and churches: life-worlds and health-seeking practices of older women with non-communicable disease in rural South Africa.          | Qualitative description    | 13 |
| Matovu & Wallhagen (2020), Uganda  | Perceived Caregiver Stress, Coping, and Quality of Life of Older Ugandan Grandparent-Caregivers                                             | Grounded theory            | 32 |
| Matovu et al (2020), Uganda        | Ugandan Jajjas: Antecedents and rewards of caring for grandchildren in the context of HIV                                                   | Grounded theory            | 32 |
| Mkhonto et al (2018), South Africa | When people with dementia are perceived as witches. Consequences for patients and nurse education in South Africa                           | Qualitative description    | 37 |
| Muchiri et al (2012), South Africa | Needs and preferences for nutrition education of type 2 diabetic adults in a resource-limited setting in South Africa                       | Phenomenology              | 31 |
| Mushi et al (2014), Tanzania       | Social Representation and Practices Related to Dementia in Hai District of Tanzania                                                         | Phenomenology              | 41 |
| Nadasen (2008), South Africa       | "Life Without Line Dancing and the Other Activities Would Be Too Dreadful to Imagine": An Increase in Social Activity for Older Women       | Not stated                 | 31 |
| Naido et al (2019), South Africa   | What the Elderly Experience and Expect From Primary Care Services in KwaZulu-Natal, South Africa                                            | Interpretative exploratory | 28 |
| Nwankwo et al (2019), Nigeria      | The clinical experiences of Nigerian physiotherapists in managing environmental and socioeconomic determinants of mobility for older adults | Qualitative description    | 20 |
| Obi et al (2019), Nigeria          | The Experience and Perception of Physiotherapists in Nigeria re: Fall Prevention in Recurrent-Faller Older Adults                           | Qualitative description    | 12 |
| Ojembe et al (2018), Nigeria       | Describing reasons for loneliness among older people in Nigeria                                                                             | phenomenology              | 12 |
| Ojembe et al (2019), Nigeria       | Television, radio, and telephone: Tools for reducing loneliness among older adults in Nigeria                                               | Phenomenology              | 15 |
| Okoh et al (2020), Nigeria         | Nigerian healthcare workers' perception of transdisciplinary approach to older adults' care: A qualitative case study                       | Case study                 | 16 |
| Rajak et al (2009), Ghana          | Further insight into West African crystalline maculopathy.                                                                                  | Case studies               | 14 |
| Richards et al (2013), Uganda      | Neglected older women and men: Exploring age and gender as structural drivers of HIV among people aged over 60 in Uganda                    | Qualitative description    | 42 |
| Roos et al (2010), South Africa    | Older persons' experiences of loneliness: A South African perspective.                                                                      | Not stated                 | 31 |
| Roos et al (2012), South Africa    | The role of context and the interpersonal experience of loneliness among older people in a residential care facility.                       | Qualitative description    | 10 |
| Roos et al (2014), South Africa    | (Re)creating community: Experiences of older women forcibly relocated during apartheid.                                                     | Ethnography                | 11 |

|                                       |                                                                                                                                                                                           |                                  |    |
|---------------------------------------|-------------------------------------------------------------------------------------------------------------------------------------------------------------------------------------------|----------------------------------|----|
| Roos et al (2016), South Africa       | Older people's experiences of giving and receiving empathy in relation to middle adolescents in rural South Africa.                                                                       | Not stated                       | 8  |
| Roos et al (2017), South Africa       | Intergenerational Care Perceptions of Older Women and Middle Adolescents in a Resource-Constrained Community in South Africa.                                                             | Narrative                        | 10 |
| Rotchford et al (2002), South Africa  | Reasons for poor cataract surgery uptake - a qualitative study in rural South Africa.                                                                                                     | Phenomenology                    | 20 |
| Rutagumirwa et al (2019), Tanzania    | "I Have to Listen to This Old Body": Femininity and the Aging Body                                                                                                                        | Grounded theory                  | 60 |
| Schatz et al (2009), South Africa     | Reframing vulnerability: Mozambican refugees' access to state-funded pensions in rural South Africa.                                                                                      | Narrative                        | 30 |
| Schatz et al (2012), South Africa     | My heart is very painful: Physical, mental and social wellbeing of older women at the times of HIV/AIDS in rural South Africa                                                             | Narrative                        | 30 |
| Schatz et al (2014), South Africa     | My legs affect me a lot. ... I can no longer walk to the forest to fetch firewood: challenges related to health and the performance of daily tasks for older women in a high HIV context. | Narrative                        | 30 |
| Schatz et al (2018), South Africa     | "I Was Referred From the Other Side": Gender and HIV Testing Among Older South Africans Living With HIV                                                                                   | Grounded theory                  | 21 |
| Schatz et al (2019), Uganda           | For us here, we remind ourselves: strategies and barriers to ART access and adherence among older Ugandans.                                                                               | Not stated                       | 40 |
| Sidloyi et al (2016), South Africa    | Survival strategies of elderly women in Ngangelizwe Township, Mthatha, South Africa: Livelihoods, social networks and income.                                                             | Not stated                       | 15 |
| Singo et al (2015), South Africa      | The views of the elderly on the impact that HIV and AIDS has on their lives in the Thulamela Municipality, Vhembe District, Limpopo province.                                             | Qualitative description          | 12 |
| Skovdal et al (2011), Zimbabwe        | Challenges faced by elderly guardians in sustaining the adherence to antiretroviral therapy in HIV-infected children in Zimbabwe.                                                         | Not stated                       | 33 |
| Sobnach et al (2009), South Africa    | First case report of pharyngeal cysticercosis                                                                                                                                             | Case study                       | 1  |
| Ssengonzi (2007), Uganda              | The Plight of Older Persons as Caregivers to People Infected/Affected by HIV/AIDS: Evidence from Uganda                                                                                   | Not stated                       | 10 |
| Tanyi, et al (2018), Cameroon         | HIV/AIDS and older adults in Cameroon: Emerging issues and implications for caregiving and policy-making                                                                                  | Qualitative descriptive analysis | 36 |
| Udvardy et al (1992), South Africa    | Gender, aging and power in sub-Saharan Africa: Challenges and puzzles.                                                                                                                    | Ethnography                      | 7  |
| van Biljon et al (2015), South Africa | A Conceptual Model of Quality of Life for Older People in Residential Care Facilities in South Africa                                                                                     | Grounded theory                  | 19 |
| Van der Geest (2002), Ghana           | I want to go!' How older people in Ghana look forward to death                                                                                                                            | Ethnography                      | 35 |
| Van der Geest et al (2004), Ghana     | "They don't come to listen": The experience of loneliness among older people in Kwahu, Ghana                                                                                              | Ethnography                      | 27 |

|                                      |                                                                                                                                                                                    |                                   |                                           |
|--------------------------------------|------------------------------------------------------------------------------------------------------------------------------------------------------------------------------------|-----------------------------------|-------------------------------------------|
| Van Dongen (2003), South Africa      | Die lewe vat ek net soos ek dit kry. Life stories and remembrance of older coloured people on farms in the western cape province.                                                  | Ethnography                       | 10                                        |
| Van Dongen (2005), South Africa      | Remembering in times of misery: Can older people in South Africa 'get through'?                                                                                                    | Ethnography                       | 50                                        |
| Wilkinson et al (2013), South Africa | Family members' perceptions and expectations of the use of syringe drivers: a South African study.                                                                                 | Qualitative description           | 8                                         |
| <b>MIXED METHOD (n=15)</b>           |                                                                                                                                                                                    |                                   |                                           |
| Afolabi et al (2019) Nigeria         | Gender analysis of nurses' attitude towards care of the elderly with dementia in Obafemi Awolowo University Teaching Hospitals Complex, Ile-Ife, Osun State, Nigeria               | Sequential exploratory            | 100                                       |
| Deist et al (2017), South Africa     | Living with a parent with dementia: A family resilience study                                                                                                                      | Cross-sectional                   | 47                                        |
| Drah (2014), Ghana & South Africa    | 'Older Women', Customary Obligations and Orphan Foster Caregiving: The Case of Queen Mothers in Manya Klo, Ghana                                                                   | Not stated                        | 34                                        |
| Frost (2015), Sub-Saharan Africa     | Care of the Elderly: Survey of Teaching in an Aging Sub-Saharan Africa                                                                                                             | Cross-sectional                   | 124                                       |
| Geyer (2010), South Africa           | Strengths-based group work with alcohol dependent older persons: Solution to an age-old problem?                                                                                   | Concurrent triangulation          | 8                                         |
| Kuteesa et al (2014), Uganda         | Experiences of HIV-related stigma among HIV-positive older persons in Uganda-A mixed methods analysis.                                                                             | Informative                       | 183                                       |
| Naah et al (2020), Cameroon          | Determinants of Active and Healthy Ageing in Sub-Saharan Africa: Evidence from Cameroon                                                                                            | Not stated                        | 100                                       |
| Ndou et al (2013), South Africa      | A rapid assessment of a community health worker pilot programme to improve the management of hypertension and diabetes in Emfuleni sub-district of Gauteng Province, South Africa. | Retrospective case study approach | 56                                        |
| Peltzer (2004), South Africa         | Health beliefs and prescription medication compliance among diagnosed hypertension clinic attenders in a rural South African hospital                                              | Not stated                        | 100                                       |
| Phillips-Howard et al (2014), Kenya  | Deaths Ascribed to Non-Communicable Diseases among Rural Kenyan Adults Are Proportionately Increasing: Evidence from a Health and Demographic Surveillance System, 2003-2010       | Not stated                        | 15228                                     |
| Pienaar et al (2010), South Africa   | Self-reported outcomes of aural rehabilitation for adult hearing aid users in a South African context.                                                                             | Not stated                        | 61                                        |
| Rhoda et al (2015), South Africa     | Provision of inpatient rehabilitation and challenges experienced with participation post discharge: quantitative and qualitative inquiry of African stroke patients.               | Retrospective record review       | 452                                       |
| Schatz (2007), South Africa          | 'Taking care of my own blood': older women's relationships to their households in rural South Africa                                                                               | Convergent                        | qualitative - 24,<br>quantitative - 70272 |

|                                   |                                                                                                                                  |            |       |
|-----------------------------------|----------------------------------------------------------------------------------------------------------------------------------|------------|-------|
| Semeere et al (2014), Uganda      | Mortality and Immunological Recovery Among Older Adults on Antiretroviral Therapy at a Large Urban HIV Clinic in Kampala, Uganda | Not stated | 9,806 |
| Watson et al (2013), South Africa | Community-based collaboration in support of older persons.                                                                       | Convergent | 333   |

## Appendix 3S

### Reference 2 (included articles, n = 512)

- Abbai, N. S., Nyirenda, M., Reddy, T., & Ramjee, G. (2017). Good correlation between the Afinion AS100 analyser and the ABX Pentra 400 analyser for the measurement of glycosylated haemoglobin and lipid levels in older adults in Durban, South Africa. *South African Medical Journal = Suid-Afrikaanse Tydskrif Vir Geneeskunde*, 108(1), 50–55. <https://doi.org/10.7196/SAMJ.2017.v108i1.12548>
- Abelson, M. (2013). Left atrial appendage closure in patients with atrial fibrillation in whom warfarin is contra-indicated: Initial South African experience. *Cardiovascular Journal of Africa*, 24(4), 107–109. <https://doi.org/10.5830/CVJA-2013-018>
- Abene, E. E., Gimba, Z. M., Edah, J. O., Akinbuwa, B. A., Uchendu, D. G., Onyenuche, C., ... & Agaba, E. I. (2020). Blood pressure control and kidney damage in hypertension: Results of a three-center cross-sectional study in North Central Nigeria. *Nigerian Journal of Clinical Practice*, 23(11), 1590.
- Aboderin, I. (2004). Decline in Material Family Support for Older People in Urban Ghana, Africa: Understanding Processes and Causes of Change. In *Journals of Gerontology - Series B Psychological Sciences and Social Sciences* (Vol. 59, Issue 3, pp. S128–S137). Gerontological Society of America. <https://doi.org/10.1093/geronb/59.3.S128>
- Aboderin, I., & Nanyonjo, A. (2017). Musculoskeletal health conditions among older populations in urban slums in sub-Saharan Africa. In *Best Practice and Research: Clinical Rheumatology* (Vol. 31, Issue 2, pp. 115–128). Bailliere Tindall Ltd. <https://doi.org/10.1016/j.berh.2017.11.001>
- Ackuaku-Dogbe, E. M., Yawson, A. E., & Biritwum, R. B. (2015). Cataract Surgical Uptake Among Older Adults in Ghana. *Ghana Medical Journal*, 49(2), 84–89. <https://doi.org/10.4314/gmj.v49i2.4>
- Adam, S. G. L. M. D. (2013). Effect of pre-fracture mobility on the early post-operative functional outcome in elderly patients with a hip fracture. *South African Journal of Physiotherapy*, 69(3), 13–19.
- Adam, A., & Koranteng, F. (2020). Availability, accessibility, and impact of social support on breast cancer treatment among breast cancer patients in Kumasi, Ghana: A qualitative study. *PloS one*, 15(4), e0231691.
- Adandom, I. I., Jumbo, S. U., Diameta, E., Nwankwo, H. C., Akinola, B., & Kalu, M. E. (2020). Managing Psycho-Social-Cognitive Factors during Hip/knee



- Fracture Rehabilitation for Older Adults: Clinicians' Experiences. *Nigerian Hospital Practice*, 26(1-2), 23-32.
- Adebajo, A. O., Cooper, C., & Evans, J. G. (1991). Fractures of the hip and distal forearm in west africa and the United Kingdom. *Age and Ageing*, 20(6), 435–438. <https://doi.org/10.1093/ageing/20.6.435>
- Adebusoye, L., Ogunbode, A., Olowookere, O., Ajayi, S., & Ladipo, M. (2018). Factors associated with sarcopenia among older patients attending a geriatric clinic in Nigeria. *Nigerian Journal of Clinical Practice*, 21(4), 443–450. [https://doi.org/10.4103/njcp.njcp\\_374\\_17](https://doi.org/10.4103/njcp.njcp_374_17)
- Adebusoye, L. A., Olowookere, O. O., Ajayi, S. A., Akinmoladun, V. I., & Alonge, T. O. (2020). Mortality Trends among Older Patients Admitted to the Geriatric Centre, University College Hospital, Ibadan, Nigeria, 2013-2017. *West African Journal of Medicine*, 37(3), 209-215.
- Adhvaryu, A. R., & Beegle, K. (2012). The long-run impacts of adult deaths on older household members in Tanzania. *Economic Development and Cultural Change*, 60(2), 245–277. <https://doi.org/10.1086/662577>
- Adinkrah, M. (2020). Grannicides in Ghana: a study of lethal violence by grandchildren against grandmothers. *Journal of elder abuse & neglect*, 32(3), 275-294.
- Agboghoroma, O. F., Akemokwe, F. M., & Puepet, F. H. (2020). Peripheral arterial disease and its correlates in patients with type 2 diabetes mellitus in a teaching hospital in northern Nigeria: a cross-sectional study. *BMC cardiovascular disorders*, 20(1), 1-6.
- Agbozo, F., Amardi-Mfoafo, J., Dwase, H., & Ellahi, B. (2018). Nutrition knowledge, dietary patterns and anthropometric indices of older persons in four peri-urban communities in Ga West municipality, ghana. *African Health Sciences*, 18(3), 743–755. <https://doi.org/10.4314/ahs.v18i3.33>
- Agunbiade, O. M., & Akinyemi, A. I. (2016). Neoliberalism and resilience among older yoruba people in a semiurban community, South West Nigeria. In *Cross-Cultural and Cross-Disciplinary Perspectives in Social Gerontology* (pp. 85–107). Springer Singapore. [https://doi.org/10.1007/978-981-10-1654-7\\_5](https://doi.org/10.1007/978-981-10-1654-7_5)
- Agunbiade, O. M., & Ayotunde, T. (2012). Ageing, sexuality and enhancement among Yoruba people in south western Nigeria. *Culture, Health and Sexuality*, 14(6), 705–717. <https://doi.org/10.1080/13691058.2012.677861>
- Agyemang-Duah, W., Peprah, C., & Arthur-Holmes, F. (2020). Predictors of healthcare utilisation among poor older people under the livelihood empowerment against poverty programme in the Atwima Nwabiagya District of Ghana. *BMC geriatrics*, 20(1), 1-11.

- Agyemang-Duah, W., Arthur-Holmes, F., Peprah, C., Adei, D., & Peprah, P. (2020). Dynamics of health information-seeking behaviour among older adults with very low incomes in Ghana: a qualitative study. *BMC Public Health*, *20*(1), 1-13.
- Aheto, J. M. K., Udofia, E. A., Kallson, E., Mensah, G., Nadia, M., Chatterji, S., ... & Yawson, A. E. (2020). Prevalence, socio-demographic and environmental determinants of asthma in 4621 Ghanaian adults: Evidence from Wave 2 of the World Health Organization's study on global AGEing and adult health. *PLoS One*, *15*(12), e0243642.
- Akande-Sholabi, W., Agha, P. C., Olowookere, O. O., & Adebuseye, L. A. (2020). Evaluation of prescription pattern of analgesic use among ambulatory elderly in South-Western Nigeria. *Annals of African Medicine*, *19*(2), 131.
- Akande-Sholabi, W., Ogundipe, F. S., & Adisa, R. (2020). Pharmacists' knowledge and counselling on fall risk increasing drugs in a tertiary teaching hospital in Nigeria. *BMC health services research*, *20*, 1-9.
- Akinrolie, O., Okoh, A. C., & Kalu, M. E. (2020). Intergenerational support between older adults and adult children in Nigeria: The role of reciprocity. *Journal of Gerontological Social Work*, *63*(5), 478-498.
- Akinyemi, A., Bamiwuye, O., Inathaniel, T., Ijadunola, K., & Fatusi, A. (2008). The Nigerian Aging Males' Symptoms scale. Experience in elderly males. *Aging Male*, *11*(2), 89–93. <https://doi.org/10.1080/13685530802169871>
- Akinyemi, J. O., Ogunbosi, B. O., Fayemiwo, A. S., Adesina, O. A., Obaro, M., Kuti, M. A., Awolude, O. A., Olaleye, D. O., & Adewole, I. F. (2017). Demographic and epidemiological characteristics of HIV opportunistic infections among older adults in Nigeria. *African Health Sciences*, *17*(2), 315–321. <https://doi.org/10.4314/ahs.v17i2.4>
- Akinyemi, R. O., Allan, L., Owolabi, M. O., Akinyemi, J. O., Ogbole, G., Ajani, A., Firbank, M., Ogunniyi, A., & Kalaria, R. N. (2014). Profile and determinants of vascular cognitive impairment in African stroke survivors: The CogFAST Nigeria Study. *Journal of the Neurological Sciences*, *346*(1–2), 241–249. <https://doi.org/10.1016/j.jns.2014.08.042>
- Akinyemi, R. O., Firbank, M., Ogbole, G. I., Allan, L. M., Owolabi, M. O., Akinyemi, J. O., Yusuf, B. P., Ogunseyinde, O., Ogunniyi, A., & Kalaria, R. N. (2015). Medial temporal lobe atrophy, white matter hyperintensities and cognitive impairment among Nigerian African stroke survivors. *BMC Research Notes*, *8*(1), 625. <https://doi.org/10.1186/s13104-015-1552-7>
- Akinyemi, R. O., Izzeldin, I. M. H., Dotchin, C., Gray, W. K., Adeniji, O., Seidi, O. A., Mwakisambwe, J. J., Mhina, C. J., Mutesi, F., Msechu, H. Z., Mteta, K.

- A., Ahmed, M. A. M., Hamid, S. H. M., Abuelgasim, N. A. A., Mohamed, S. A. A., Mohamed, A. Y. O., Adesina, F., Hamzat, M., Olunuga, T., ... Walker, R. (2014). Contribution of noncommunicable diseases to medical admissions of elderly adults in Africa: A prospective, Cross-Sectional study in Nigeria, Sudan, and Tanzania. *Journal of the American Geriatrics Society*, *62*(8), 1460–1466. <https://doi.org/10.1111/jgs.12940>
- Akor, A. A., Bamidele, A., & Erhabor, G. E. (2020). Predictors of Health-Related Quality of Life (HRQOL) in Patients With Chronic Obstructive Pulmonary Disease using the COPD Assessment Test (CAT). *West African Journal of Medicine*, *37*(3), 275-280.
- Akoria, O., Osian, F., Akene, B., Ugorji, E., & Emore, O. (2021). Evaluation of Documentation of Admissions into A Geriatrics Unit in Nigeria: 2014-2018. *West African Journal of Medicine*, *38*(1), 873-879.
- Akosile, Christopher O., Anukam, G. O., Johnson, O. E., Fabunmi, A. A., Okoye, E. C., Iheukwumere, N., & Akinwola, M. O. (2014). Fear of Falling and Quality of Life of Apparently-Healthy Elderly Individuals from a Nigerian Population. *Journal of Cross-Cultural Gerontology*, *29*(2), 201–209. <https://doi.org/10.1007/s10823-014-9228-7>
- Akosile, Christopher Olusanjo, Mgbeojedo, U. G., Maruf, F. A., Okoye, E. C., Umeonwuka, I. C., & Ogunniyi, A. (2018). Depression, functional disability and quality of life among Nigerian older adults: Prevalences and relationships. *Archives of Gerontology and Geriatrics*, *74*, 39–43. <https://doi.org/10.1016/j.archger.2017.08.011>
- Akuamoah-Boateng, H. (2013). Self-reported vision health status among older people in the Kassena-Nankana District, Ghana. *Global Health Action*, *6*(1), 19012. <https://doi.org/10.3402/gha.v6i0.19012>
- Alberts, A. S., Falkson, G., & Van Der Merwe, R. (1991). *Metastatic breast cancer - age has a significant effect on survival*. South African Medical Journal. <https://www.ajol.info/index.php/samj/article/view/158041>
- Alidu, L., & Grunfeld, E. A. (2020). 'What a dog will see and kill, a cat will see and ignore it': An exploration of health-related help-seeking among older Ghanaian men residing in Ghana and the United Kingdom. *British Journal of Health Psychology*, *25*(4), 1102-1117.
- Allain, T. J., Mwambelo, M., Mdolo, T., & Mfunu, P. (2014). Falls and other geriatric syndromes in Blantyre, Malawi: A community survey of older adults. *Malawi Medical Journal*, *26*(4), 105–108. [www.mmj.medcol.mw](http://www.mmj.medcol.mw)
- Amegbor, P. M., Kuuire, V. Z., Robertson, H., & Kuffuor, O. A. (2018). Predictors of basic self-care and intermediate self-care functional disabilities among older adults in Ghana. *Archives of Gerontology and Geriatrics*, *77*, 81–88. <https://doi.org/10.1016/j.archger.2018.04.006>

- Amegbor, P. M., Braimah, J. A., Adjaye-Gbewonyo, D., Rosenberg, M. W., & Sabel, C. E. (2020). Effect of cognitive and structural social capital on depression among older adults in Ghana: A multilevel cross-sectional analysis. *Archives of gerontology and geriatrics*, *89*, 104045.
- Ameh, S., Gómez-Olivé, F. X., Kahn, K., Tollman, S. M., & Klipstein-Grobusch, K. (2014). Predictors of health care use by adults 50 years and over in a rural South African setting. *Global Health Action*, *7*(1). <https://doi.org/10.3402/gha.v7.24771>
- Amod, F., Moodley, I., Peer, A. K. C., Sunderland, J., Lovering, A., Wootton, M., Nadvi, S., & Vawda, F. (2005). Ventriculitis due to a hetero strain of vancomycin intermediate Staphylococcus aureus (hVISA): Successful treatment with linezolid in combination with intraventricular vancomycin. *Journal of Infection*, *50*(3), 252–257. <https://doi.org/10.1016/j.jinf.2004.04.002>
- Amoo, G., Ogundele, A. T., Olajide, A. O., Ighoroje, M. G., Oluwaranti, A. O., Onunka, G. C., ... & Folaji, O. G. (2020). Prevalence and pattern of psychiatric morbidity among community-dwelling elderly populations in Abeokuta, Nigeria. *Journal of geriatric psychiatry and neurology*, *33*(6), 353-362.
- Amosun, S. L. (2014). The process of enhancing a geriatric module in undergraduate physiotherapy education in South Africa--perceived attitudes towards ageing among community-dwelling elderly persons in cape town. *South African Journal of Physiotherapy*, *70*(1), 24–30. <https://go.gale.com/ps/i.do?p=AONE&sw=w&issn=03796175&v=2.1&it=r&id=GALE%7CA455784091&sid=googleScholar&linkaccess=fulltext>
- Amosun, S. L., Burgess, T., Groeneveldt, L., & Hodgson, T. (2007). Are elderly pedestrians allowed enough time at pedestrian crossings in Cape Town, South Africa? *Physiotherapy Theory and Practice*, *23*(6), 325–332. <https://doi.org/10.1080/09593980701593755>
- Annin, K., Saeed, B., Yawson, A., Musah, A. A., Nakua, E., Agyei-Baffour, P., & Nsowah-Nuamah, N. N. (2014). Assessing the association between the degree of pain and socioeconomic status among older persons in Ghana. *Global Journal of Health Science*, *6*(3), 155–164. <https://doi.org/10.5539/gjhs.v6n3p155>
- Ardington, C., Case, A., Islam, M., Lam, D., Leibbrandt, M., Menendez, A., & Olgiati, A. (2010). The impact of AIDS on intergenerational support in South Africa: Evidence from the cape area panel study. *Research on Aging*, *32*(1), 97–121. <https://doi.org/10.1177/0164027509348143>
- Awoke, M. A., Negin, J., Moller, J., Farell, P., Yawson, A. E., Biritwum, R. B., & Kowal, P. (2017). Predictors of public and private healthcare utilization and associated health system responsiveness among older adults in Ghana. *Global Health Action*, *10*(1). <https://doi.org/10.1080/16549716.2017.1301723>
- Awuviry-Newton, K., Ofori-Dua, K., & Newton, A. (2020). Correlates of older adult inpatients' personal care provision to people with functional difficulties in Ghana. *PloS one*, *15*(10), e0238693.

- Awuviry-Newton, K., Wales, K., Tavener, M., & Byles, J. (2020). Do factors across the World Health Organisation's International Classification of Functioning, Disability and Health framework relate to caregiver availability for community-dwelling older adults in Ghana?. *PloS one*, *15*(5), e0233541.
- Ayernor, P. K. (2012). Diseases of ageing in Ghana. *Ghana Medical Journal*, *46*(2 Suppl), 18–22. /pmc/articles/PMC3645144/?report=abstract
- Ayodapo, A. O., Elegbede, O. T., Omosanya, O. E., & Monsudi, K. F. (2020). Patient education and medication adherence among hypertensives in a tertiary hospital, South Western Nigeria. *Ethiopian journal of health sciences*, *30*(2).
- Ayokunle, A. M., Oyeyemi, F. T., Onipede, W., O, T. F., Olagunju, A. E., Makinde, G. B., Olawole-Isaac, A., & Oluwatomipe, A. P. (2015). The Definitions and Onset of an Old Person in South-Western Nigeria. *Educational Gerontology*, *41*(7), 494–503. <https://doi.org/10.1080/03601277.2014.1003492>
- Ayuk, A. E., Omoronyia, O. E., Asibong, U. E., Enang, O. E., Legogie, A. O., & Nwafor, K. N. (2020). Impact of diabetes mellitus on sexuality in a developing country setting: A case-control study in Calabar, Nigeria. *Nigerian Journal of Clinical Practice*, *23*(6), 870.
- Balogun, S., Yusuff, H., Adeleye, B., Balogun, M., Aminu, A., Yusuf, K., & Tettey, P. (2018). Determinants of bed net use among older people in Nigeria: Results from a nationally representative survey. *Pan African Medical Journal*, *31*. <https://doi.org/10.11604/pamj.2018.31.112.12627>
- Bastawrous, A., Mathenge, W., Wing, K., Rono, H., Gichangi, M., Weiss, H. A., Macleod, D., Foster, A., Burton, M. J., & Kuper, H. (2016). Six-year incidence of blindness and visual impairment in Kenya: The Nakuru eye disease cohort study. *Investigative Ophthalmology and Visual Science*, *57*(14), 5974–5983. <https://doi.org/10.1167/iovs.16-19835>
- Beaugé, Y., De Allegri, M., Ouédraogo, S., Bonnet, E., Kuunibe, N., & Ridde, V. (2020). Do Targeted User Fee Exemptions Reach the Ultra-Poor and Increase their Healthcare Utilisation? A Panel Study from Burkina Faso. *International Journal of Environmental Research and Public Health*, *17*(18), 6543.
- Bennett, R., Chepngeno-Langat, G., Evandrou, M., & Falkingham, J. (2016). Gender differentials and old age survival in the Nairobi slums, Kenya. *Social Science and Medicine*, *163*, 107–116. <https://doi.org/10.1016/j.socscimed.2016.07.002>
- Biritwum, R. B., Mensah, G., Minicuci, N., Yawson, A. E., Naidoo, N., Chatterji, S., & Kowal, P. (2013). Household characteristics for older adults and study background from SAGE Ghana Wave 1. *Global Health Action*, *6*(1). <https://doi.org/10.3402/gha.v6i0.20096>
- Bloomfield, G. S., DeLong, A. K., Akwanalo, C. O., Hogan, J. W., Carter, E. J., Aswa, D. F., Binanay, C., Koech, M., Kimaiyo, S., & Velazquez, E. J. (2016). Markers of Atherosclerosis, Clinical Characteristics, and Treatment Patterns in Heart Failure: A Case-Control Study of Middle-Aged Adult Heart Failure

- Patients in Rural Kenya. *Global Heart*, 11(1), 97. <https://doi.org/10.1016/j.gheart.2015.12.014>
- Boateng, G. O., Adams, E. A., Odei Boateng, M., Luginaah, I. N., & Taabazuing, M.-M. (2017). Obesity and the burden of health risks among the elderly in Ghana: A population study. *PLOS ONE*, 12(11), e0186947. <https://doi.org/10.1371/journal.pone.0186947>
- Bohman, D. M., Van Wyk, N. C., & Ekman, S. (2014). Existing and evolving in two minds: Beliefs in relation to health and illness expressed by older South Africans. *Africa Journal of Nursing and Midwifery*, 16(2), 139–152. <https://doi.org/10.25159/2520-5293/37>
- Bohman, Doris M., Vasuthevan, S., Van Wyk, N. C., & Ekman, S. L. (2007). “We clean our houses, prepare for weddings and go to funerals”: Daily lives of elderly Africans in Majaneng, South Africa. *Journal of Cross-Cultural Gerontology*, 22(4), 323–337. <https://doi.org/10.1007/s10823-007-9040-8>
- Boon, H., James, S., Ruiter, R. A. C., Van Den Borne, B., Williams, E., & Reddy, P. (2010). Explaining perceived ability among older people to provide care as a result of HIV and AIDS in South Africa. *AIDS Care - Psychological and Socio-Medical Aspects of AIDS/HIV*, 22(4), 399–408. <https://doi.org/10.1080/09540120903202921>
- Boon, H., Ruiter, R. A. C., James, S., Van Den Borne, B., Williams, E., & Reddy, P. (2009). The impact of a community-based pilot health education intervention for older people as caregivers of orphaned and sick children as a result of HIV and AIDS in South Africa. *Journal of Cross-Cultural Gerontology*, 24(4), 373–389. <https://doi.org/10.1007/s10823-009-9101-2>
- Boon, H., Ruiter, R. A. C., James, S., Van Den Borne, B., Williams, E., & Reddy, P. (2010). Correlates of grief among older adults caring for children and grandchildren as a consequence of HIV and AIDS in South Africa. *Journal of Aging and Health*, 22(1), 48–67. <https://doi.org/10.1177/0898264309349165>
- Brathwaite, D., Mogotlane, S., Rodriguez, H., Dorsey, S., Mangongo, R., & Matlakala, M. (2002). Elderly citizen’s perception of their health and care provided in a rural South African community. *ABNF Journal*, 13(2), 37–41. <https://go.gale.com/ps/i.do?p=AONE&sw=w&issn=10467041&v=2.1&it=r&id=GALE%7CA93610977&sid=googleScholar&linkaccess=fulltext>
- Cadmus, E. O., Owoaje, E. T., & Akinyemi, O. O. (2015). Older persons’ Views and experience of elder abuse in south western Nigeria: A community-based qualitative survey. *Journal of Aging and Health*, 27(4), 711–729. <https://doi.org/10.1177/0898264314559893>
- Callixte, K. T., Clet, T. B., Jacques, D., Faustin, Y., François, D. J., & Maturin, T. T. (2015). The pattern of neurological diseases in elderly people in outpatient

consultations in Sub-Saharan Africa. *BMC Research Notes*, 8(1). <https://doi.org/10.1186/s13104-015-1116-x>

Calys-Tagoe, B., Nuertey, B. D., Tetteh, J., & Yawson, A. E. (2020). Individual awareness and treatment effectiveness of hypertension among older adults in Ghana: evidence from the World Health Organization study of global ageing and adult health wave 2. *The Pan African Medical Journal*, 37.

Calys-Tagoe, B. N. L., Hewlett, S. A., Dako-Gyeke, P., Yawson, A. E., Baddoo, N. A., Seneadza, N. A. H., Mensah, G., Minicuci, N., Naidoo, N., Chatterji, S., Kowal, P., & Biritwum, R. B. (2014). Predictors of subjective well-being among older Ghanaians. *Ghana Medical Journal*, 48(4), 178–184. <https://doi.org/10.4314/gmj.v48i4.2>

Charlton, K. E., Kolbe-Alexander, T. L., & Nel, J. H. (2007). The MNA, but not the DETERMINE, screening tool is a valid indicator of nutritional status in elderly Africans. *Nutrition*, 23(7–8), 533–542. <https://doi.org/10.1016/j.nut.2007.04.015>

Charlton, K. E., Levitt, N. S., & Lombard, C. J. (1997). *The prevalence of diabetes mellitus and associated risk factors in elderly coloured South Africans*. South African Medical Journal. <https://pubmed.ncbi.nlm.nih.gov/9137356/>

Chepngeno-Langat, G. (2013). Perception of vulnerability to HIV infection among older people in Nairobi, Kenya: A need for intervention. *Journal of Biosocial Science*, 45(2), 249–266. <https://doi.org/10.1017/S0021932012000417>

Chepngeno-Langat, G. (2014). Entry and re-entry into informal care-giving over a 3-year prospective study among older people in Nairobi slums, Kenya. *Health and Social Care in the Community*, 22(5), 533–544. <https://doi.org/10.1111/hsc.12114>

Chepngeno-Langat, G., Falkingham, J. C., Madise, N. J., & Evandrou, M. (2012). Concern About HIV and AIDS Among Older People in the Slums of Nairobi, Kenya. *Risk Analysis*, 32(9), 1512–1523. <https://doi.org/10.1111/j.1539-6924.2011.01765.x>

Chepngeno-Langat, G., Madise, N., Evandrou, M., & Falkingham, J. (2011). Gender differentials on the health consequences of care-giving to people with AIDS-related illness among older informal carers in two slums in Nairobi, Kenya. *AIDS Care*, 23(12), 1586–1594. <https://doi.org/10.1080/09540121.2011.569698>

Chilima, D. M., & Ismail, S. J. (1998). Anthropometric characteristics of older people in rural Malawi. *European Journal of Clinical Nutrition*, 52(9), 643–649. <https://doi.org/10.1038/sj.ejcn.1600617>

Chilima, Dorothy M, & Ismail, S. J. (2001). Nutrition and handgrip strength of older adults in rural Malawi. *Public Health Nutrition*, 4(1), 11–17.

<https://doi.org/10.1079/phn200050>

- Chukwuorji, J. B. C., Nwoke, M. B., & Ebere, M. O. (2017). Stressful life events, family support and successful ageing in the Biafran War generation. *Aging and Mental Health*, 21(1), 95–103. <https://doi.org/10.1080/13607863.2015.1083946>
- Clark, D. O., Gao, S., Lane, K. A., Callahan, C. M., Baiyewu, O., Ogunniyi, A., & Hendrie, H. C. (2014). Obesity and 10-year mortality in very old african americans and yoruba-nigerians: Exploring the obesity paradox. *Journals of Gerontology - Series A Biological Sciences and Medical Sciences*, 69(9), 1162–1169. <https://doi.org/10.1093/gerona/glu035>
- Clausen, T., Charlton, K. E., Gobotswang, K. S. M., & Holmboe-Ottesen, G. (2005). Predictors of food variety and dietary diversity among older persons in Botswana. *Nutrition*, 21(1), 86–95. <https://doi.org/10.1016/j.nut.2004.09.012>
- Dake, F. A., & Van Der Wielen, N. (2020). Towards universal access to healthcare for older adults: an assessment of the old-age exemption policy under Ghana's National Health Insurance Scheme. *International journal for equity in health*, 19(1), 1-10.
- De Jager, C. A., Msemburi, W., Pepper, K., & Combrinck, M. I. (2017). Dementia Prevalence in a Rural Region of South Africa: A Cross-Sectional Community Study. *Journal of Alzheimer's Disease*, 60(3), 1087–1096. <https://doi.org/10.3233/JAD-170325>
- de Klerk, J., & Moyer, E. (2017). "A Body Like a Baby": Social Self-Care among Older People with Chronic HIV in Mombasa. *Medical Anthropology*, 36(4), 305–318. <https://doi.org/10.1080/01459740.2016.1235573>
- De Picciotto, J., & Friedland, D. (2001). Verbal fluency in elderly bilingual speakers: Normative data and preliminary application to Alzheimer's disease. *Folia Phoniatica et Logopaedica*, 53(3), 145–152. <https://doi.org/10.1159/000052669>
- de Terline, D. M., Kramoh, K. E., Diop, I. B., Nhavoto, C., Balde, D. M., Ferreira, B., ... & Antignac, M. (2020). Poor adherence to medication and salt restriction as a barrier to reaching blood pressure control in patients with hypertension: Cross-sectional study from 12 sub-Saharan countries. *Archives of Cardiovascular Diseases*, 113(6-7), 433-442.
- de Villiers, L., Badri, M., Ferreira, M., & Bryer, A. (2011). Stroke outcomes in a socio-economically disadvantaged urban community. *South African Medical Journal*, 101(5), 345–348. <https://doi.org/10.7196/samj.4588>
- De Villiers, P. J. T., Steele, A. D., Hiemstra, L. A., Rappaport, R., Dunning, A. J., Gruber, W. C., & Forrest, B. D. (2009). Efficacy and safety of a live



- attenuated influenza vaccine in adults 60 years of age and older. *Vaccine*, 28(1), 228–234. <https://doi.org/10.1016/j.vaccine.2009.09.092>
- Dei, V., & Sebastian, M. S. (2018). Is healthcare really equal for all? Assessing the horizontal and vertical equity in healthcare utilisation among older Ghanaians. *International Journal for Equity in Health*, 17(1), 86. <https://doi.org/10.1186/s12939-018-0791-3>
- Deist, M., & Greeff, A. P. (2017). Living with a parent with dementia: A family resilience study. *Dementia*, 16(1), 126–141. <https://doi.org/10.1177/1471301215621853>
- Desormais, I., Aboyans, V., Guerchet, M., Ndamba-Bandzouzi, B., Mbelesso, P., Dantoine, T., Mohty, D., Marin, B., Preux, P. M., & Lacroix, P. (2015). Prevalence of peripheral artery disease in the elderly population in urban and rural areas of Central Africa: The EPIDEMCA study. *European Journal of Preventive Cardiology*, 22(11), 1462–1472. <https://doi.org/10.1177/2047487314557945>
- Dewhurst, F., Dewhurst, M. J., Gray, W. K., Aris, E., Orega, G., Howlett, W., Warren, N., & Walker, R. W. (2013). The prevalence of neurological disorders in older people in Tanzania. *Acta Neurologica Scandinavica*, 127(3), 198–207. <https://doi.org/10.1111/j.1600-0404.2012.01709.x>
- Dewhurst, Felicity, Dewhurst, M. J., Gray, W. K., Chaote, P., Howlett, W., Orega, G., & Walker, R. W. (2012). Rates of diagnosis and treatment of neurological disorders within a prevalent population of community-dwelling elderly people in sub-Saharan Africa. *Journal of Epidemiology and Global Health*, 2(4), 207–214. <https://doi.org/10.1016/j.jegh.2012.11.002>
- Dewhurst, Felicity, Dewhurst, M. J., Gray, W. K., Orega, G., Howlett, W., Chaote, P., Dotchin, C., Longdon, A. R., Paddick, S. M., & Walker, R. W. (2012). The prevalence of disability in older people in Hai, Tanzania. *Age and Ageing*, 41(4), 517–523. <https://doi.org/10.1093/ageing/afs054>
- Dewhurst, M. J., Adams, P. C., Gray, W. K., Dewhurst, F., Orega, G. P., Chaote, P., & Walker, R. W. (2012). Strikingly low prevalence of atrial fibrillation in elderly Tanzanians. *Journal of the American Geriatrics Society*, 60(6), 1135–1140. <https://doi.org/10.1111/j.1532-5415.2012.03963.x>
- Dewhurst, M. J., Dewhurst, F., Gray, W. K., Chaote, P., Orega, G. P., & Walker, R. W. (2013). The high prevalence of hypertension in rural-dwelling Tanzanian older adults and the disparity between detection, treatment and control: A rule of sixths? *Journal of Human Hypertension*, 27(6), 374–380. <https://doi.org/10.1038/jhh.2012.59>
- Dia, N., Richard, V., Kiori, D., Cisse, E. H. A. K., Sarr, F. D., Faye, A., Goudiaby, D. G., Diop, O. M., & Niang, M. N. (2014). Respiratory viruses associated with patients older than 50 years presenting with ILI in Senegal, 2009 to 2011. *BMC Infectious Diseases*, 14(1), 189. <https://doi.org/10.1186/1471-2334->

- Diameta, E., Adandom, I., Jumbo, S. U., Nwankwo, H. C., Obi, P. C., & Kalu, M. E. (2018). The Burden Experience of Formal and Informal Caregivers of Older Adults With Hip Fracture in Nigeria. *Journals.Sagepub.Com*, 4. <https://doi.org/10.1177/2377960818785155>
- Diamond, T. H., Botha, J. R., Kalk, W. J., & Shires, R. (1986). Primary hyperparathyroidism. A study of 100 patients in Johannesburg. *South African Medical Journal*, 69(2), 94–97. <https://europepmc.org/article/med/3941958>
- Digenio, A. G., Sim, J. G. M., Krige, K., Stewart, A., Morris, R., Dowdeswell, R. J., & Padayachee, G. N. (1991). *The Johannesburg cardiac rehabilitation programme*. South African Medical Journal. <https://pubmed.ncbi.nlm.nih.gov/1996433/>
- Dobseu, R., Nanfack, A., Kowo, M., Ambada, G., Kamgaing, R., Chenwi, C., ... & Ndjolo, A. (2020). Evaluation of hepatic fibrosis in HIV/HCV co-infected individuals in Yaoundé, Cameroon: usefulness of APRI score in resource-constrained settings. *BMC Infectious Diseases*, 20(1), 1-7.
- Dotchin, C. L., Paddick, S. M., Gray, W. K., Kisoli, A., Orega, G., Longdon, A. R., Chaote, P., Dewhurst, F., Dewhurst, M., & Walker, R. W. (2015). The association between disability and cognitive impairment in an elderly Tanzanian population. *Journal of Epidemiology and Global Health*, 5(1), 57–64. <https://doi.org/10.1016/j.jegh.2014.09.004>
- Drah, B. B. (2014). “Older Women”, Customary Obligations and Orphan Foster Caregiving: The Case of Queen Mothers in Many Klo, Ghana. *Journal of Cross-Cultural Gerontology*, 29(2), 211–229. <https://doi.org/10.1007/s10823-014-9232-y>
- du Rand, P., & Engelbrecht, K. (2001). Needs of frail elderly people in informal settlements. *Curationis*, 24(4), 10–16. <https://doi.org/10.4102/curationis.v24i4.869>
- Eales, C. J., & Stewart, A. V. (1996). The exercise capacity of three socio-economic groups of elderly hypertensive patients. *Physiotherapy Research International*, 1(4), 255–264. <https://doi.org/10.1002/pri.69>
- Eales, C. J., & Stewart, A. V. (1997). *A proposed field test for evaluating fitness in elderly hypertensive patients*. South African Journal of Physiotherapy. <https://doi.org/10.4102/sajp.v53i2.1362>
- Eduardo, E., Lamb, M. R., Kandula, S., Howard, A., Mugisha, V., Kimanga, D., Kilama, B., El-Sadr, W., & Elul, B. (2014). Characteristics and Outcomes among Older HIV-Positive Adults Enrolled in HIV Programs in Four Sub-Saharan African Countries. *PLoS ONE*, 9(7), e103864.

<https://doi.org/10.1371/journal.pone.0103864>

- Elk, R., Swartz, L., & Gillis, L. S. (1983). *The Coloured elderly in Cape Town. A psychosocial, psychiatric and medical community survey. Part I. Introduction and psychosocial data*. South African Medical Journal. <https://pubmed.ncbi.nlm.nih.gov/6648741/>
- Enikuomehin, A., Kolawole, B. A., Soyoye, O. D., Adebayo, J. O., & Ikem, R. T. (2020). Influence of gender on the distribution of type 2 diabetic complications at the obafemi awolowo teaching hospital, Ile-Ife, Nigeria. *African Health Sciences*, 20(1), 294-307.
- Eze, B. U., Mbaeri, T. U., & Orakwe, J. C. (2020). Anterior bladder wall thickness, post-void urine residue, and bladder emptying efficiency as indicators of bladder dysfunction in Nigerian men with benign prostatic hyperplasia. *Nigerian Journal of Clinical Practice*, 23(9), 1215.
- Ezenwa, E. V., Osaghae, S. O., Ozah, E. O., & Okparanta, G. (2020). Apical peri-prostatic nerve block versus intra-rectal xylocaine gel for trans-rectal ultrasound guided prostate biopsy among Nigerian patients: A prospective randomized study. *Nigerian Journal of Clinical Practice*, 23(9), 1183
- Faber, M., Kriek, J. A., Wolmarans, P., van Staden, E., Benadé, A. J., Labadarios, D., Slazus, W., & Taljaard, J. J. (1992). Dietary patterns and nutritional status in free-living older white men with established vascular disease. *South African Medical Journal = Suid-Afrikaanse Tydskrif Vir Geneeskunde*, 82(4), 232–236. <http://www.ncbi.nlm.nih.gov/pubmed/1411818>
- Fakoya, O. O., Abioye-Kuteyi, E. A., Bello, I. S., Oyegbade, O. O., Olowookere, S. A., & Ezeoma, I. T. (2018). Determinants of Quality of Life of Elderly Patients Attending a General Practice Clinic in Southwest Nigeria. *International Quarterly of Community Health Education*, 39(1), 3–7. <https://doi.org/10.1177/0272684X18781781>
- Fantahun, M., Berhane, Y., Högberg, U., Wall, S., & Byass, P. (2009). Ageing of a rural Ethiopian population: who are the survivors? *Public Health*, 123(4), 326–330. <https://doi.org/10.1016/j.puhe.2008.10.019>
- Fawale, M. B., Ismaila, I. A., Mustapha, A. F., Komolafe, M. A., & Ibigbami, O. (2017). Correlates of sleep quality and sleep duration in a sample of urban-dwelling elderly Nigerian women. *Sleep Health*, 3(4), 257–262. <https://doi.org/10.1016/j.sleh.2017.05.008>
- Ferrari, R., Ford, I., Greenlaw, N., Tardif, J. C., Tendera, M., Abergel, H., Fox, K., Hu, D., Shalnova, S., & Steg, P. G. (2015). Geographical variations in the prevalence and management of cardiovascular risk factors in outpatients with CAD: Data from the contemporary CLARIFY registry. In *European Journal of Preventive Cardiology* (Vol. 22, Issue 8, pp. 1056–1065). SAGE Publications Inc. <https://doi.org/10.1177/2047487314547652>

- Folorunso, D. F., Dahilo, E. A., Gbujie, I. O., Damtong, F. M., Quadri, O. A., Nwakwo, B. E., ... & Nwaorgu, O. B. (2020). Age-related hearing loss at Gwagwalada area council of federal capital territory, Abuja. *Nigerian Journal of Clinical Practice*, 23(11), 1494.
- Forrest, B. D., Steele, A. D., Hiemstra, L., Rappaport, R., Ambrose, C. S., & Gruber, W. C. (2011). A prospective, randomized, open-label trial comparing the safety and efficacy of trivalent live attenuated and inactivated influenza vaccines in adults 60 years of age and older. *Vaccine*, 29(20), 3633–3639. <https://doi.org/10.1016/j.vaccine.2011.03.029>
- Frost, L., Liddie Navarro, A., Lynch, M., Campbell, M., Orcutt, M., Trelfa, A., Dotchin, C., & Walker, R. (2015). Care of the Elderly: Survey of Teaching in an Aging Sub-Saharan Africa. *Gerontology and Geriatrics Education*, 36(1), 14–29. <https://doi.org/10.1080/02701960.2014.925886>
- Gatimu, S. M., Milimo, B. W., & Sebastian, M. S. (2016). Prevalence and determinants of diabetes among older adults in Ghana. *BMC Public Health*, 16(1), 1–12. <https://doi.org/10.1186/s12889-016-3845-8>
- Gaziano, T. A., Abrahams-Gessel, S., Gomez-Olive, F. X., Wade, A., Crowther, N. J., Alam, S., Manne-Goehler, J., Kabudula, C. W., Wagner, R., Rohr, J., Montana, L., Kahn, K., Bärnighausen, T. W., Berkman, L. F., & Tollman, S. (2017). Cardiometabolic risk in a population of older adults with multiple co-morbidities in rural South Africa: the HAALSI (Health and Aging in Africa: longitudinal studies of INDEPTH communities) study. *BMC Public Health*, 17(1), 1–10. <https://doi.org/10.1186/s12889-017-4117-y>
- Geerts, G. A. V. M. (2017). Neutral zone or conventional mandibular complete dentures: a randomised crossover trial comparing oral health-related quality of life. *Journal of Oral Rehabilitation*, 44(9), 702–708. <https://doi.org/10.1111/joor.12533>
- Geyer, S. (2010). Strengths-based groupwork with alcohol dependent older persons: Solution to an age-old problem? *Groupwork*, 20(1), 63–86. <https://doi.org/10.1921/095182410X535935>
- Gildner, T. E., Liebert, M. A., Kowal, P., Chatterji, S., & Josh Snodgrass, J. (2014). Sleep duration, sleep quality, and obesity risk among older adults from six middle-income countries: findings from the study on global AGEing and adult health (SAGE). *American Journal of Human Biology : The Official Journal of the Human Biology Council*, 26(6), 803–812. <https://doi.org/10.1002/ajhb.22603>
- Gillis, L. S., & Elk, R. (1981). *Physical and mental incapacity in elderly White persons in Cape Town. A community survey*. South African Medical Journal. [https://journals.co.za/content/m\\_samj/59/5/AJA20785135\\_13564](https://journals.co.za/content/m_samj/59/5/AJA20785135_13564)

- Gillis, L. S., Welman, M., Koch, A., & Joyi, M. (1991). *Psychological distress and depression in urbanising elderly black persons*. South African Medical Journal. <https://www.ajol.info/index.php/samj/article/view/158373>
- Golaz, V., Wandera, S. O., & Rutaremwa, G. (2017). Understanding the vulnerability of older adults: Extent of and breaches in support systems in Uganda. *Ageing and Society*, 37(1), 63–89. <https://doi.org/10.1017/S0144686X15001051>
- Gómez-Olivé, F. X., Thorogood, M., Clark, B., Kahn, K., & Tollman, S. (2013). Self-reported health and health care use in an ageing population in the Agincourt sub-district of rural South Africa. *Global Health Action*, 6, 19305. <https://doi.org/10.3402/gha.v6i0.19305>
- Gómez-Olivé, F. X., Thorogood, M., Kandala, N. B., Tigbe, W., Kahn, K., Tollman, S., & Stranges, S. (2014). Sleep problems and mortality in rural South Africa: Novel evidence from a low-resource setting. *Sleep Medicine*, 15(1), 56–63. <https://doi.org/10.1016/j.sleep.2013.10.003>
- Gómez-Olivé, X., Thorogood, M., Bocquier, P., Mee, P., Kahn, K., Berkman, L., & Tollman, S. (2014). Social Conditions and Disability Related to the Mortality of Older People in Rural South Africa. *World Health & Population*, 15(4), 34–43. <https://doi.org/10.12927/whp.2015.24266>
- Govender, T., & Barnes, J. M. (2014). The Health Status and Unmet Health Needs of Old-Age Pensioners Living in Selected Urban Poor Communities in Cape Town, South Africa. *Journal of Community Health*, 39(6), 1063–1070. <https://doi.org/10.1007/s10900-014-9851-9>
- Gray, W. K., Dewhurst, F., Dewhurst, M. J., Orega, G., Kissima, J., Chaote, P., & Walker, R. W. (2016). Rates and predictors of three-year mortality in older people in rural Tanzania. *Archives of Gerontology and Geriatrics*, 62, 36–42. <https://doi.org/10.1016/j.archger.2015.10.008>
- Gray, W. K., Orega, G., Kisoli, A., Rogathi, J., Paddick, S. M., Longdon, A. R., Walker, R. W., Dewhurst, F., Dewhurst, M., Chaote, P., & Dotchin, C. (2017). Identifying Frailty and its Outcomes in Older People in Rural Tanzania. *Experimental Aging Research*, 43(3), 257–273. <https://doi.org/10.1080/0361073X.2017.1298957>
- Gray, W. K., Paddick, S. M., Kisoli, A., Dotchin, C. L., Longdon, A. R., Chaote, P., Samuel, M., Jusabani, A. M., & Walker, R. W. (2014). Development and validation of the identification and intervention for dementia in elderly Africans (IDEA) study dementia screening instrument. *Journal of Geriatric Psychiatry and Neurology*, 27(2), 110–118. <https://doi.org/10.1177/0891988714522695>
- Guerchet, M., Houinato, D., Paraiso, M. N., Von Ahnen, N., Nubukpo, P., Otto, M., Clément, J. P., Preux, P. M., & Dartigues, J. F. (2009). Cognitive impairment and dementia in elderly people living in rural Benin, West Africa. *Dementia and Geriatric Cognitive Disorders*, 27(1), 34–41.

<https://doi.org/10.1159/000188661>

- Guerchet, M., M'Belesso, P., Mouanga, A. M., Bandzouzi, B., Tabo, A., Houinato, D. S., Paraïso, M. N., Cowppli-Bony, P., Nubukpo, P., Aboyans, V., Clément, J. P., Dartigues, J. F., & Preux, P. M. (2010). Prevalence of dementia in elderly living in two cities of central africa: The EDAC survey. *Dementia and Geriatric Cognitive Disorders*, *30*(3), 261–268. <https://doi.org/10.1159/000320247>
- Guerchet, M., Mbelesso, P., Mouanga, A. M., Tabo, A., Bandzouzi, B., Clément, J. P., Lacroix, P., Preux, P. M., & Aboyans, V. (2013). Association between a low ankle-brachial index and dementia in a general elderly population in Central Africa (epidemiology of dementia in Central Africa study). *Journal of the American Geriatrics Society*, *61*(7), 1135–1140. <https://doi.org/10.1111/jgs.12310>
- Guerchet, M., Mouanga, A. M., M'belesso, P., Tabo, A., Bandzouzi, B., Paraïso, M. N., Houinato, D. S., Cowppli-Bony, P., Nubukpo, P., Aboyans, V., Clément, J. P., Dartigues, J. F., & Preux, P. M. (2012). Factors associated with dementia among elderly people living in two cities in Central Africa: The EDAC multicenter study. *Journal of Alzheimer's Disease*, *29*(1), 15–24. <https://doi.org/10.3233/JAD-2011-111364>
- Gureje, O., Ademola, A., & Olley, B. O. (2008). Depression and disability: Comparisons with common physical conditions in the Ibadan Study of Aging. *Journal of the American Geriatrics Society*, *56*(11), 2033–2038. <https://doi.org/10.1111/j.1532-5415.2008.01956.x>
- Gureje, O., Kola, L., & Afolabi, E. (2007). Epidemiology of major depressive disorder in elderly Nigerians in the Ibadan Study of Ageing: a community-based survey. *Lancet*, *370*(9591), 957–964. [https://doi.org/10.1016/S0140-6736\(07\)61446-9](https://doi.org/10.1016/S0140-6736(07)61446-9)
- Gureje, O., Ogunniyi, A., & Kola, L. (2006). The profile and impact of probable dementia in a sub-Saharan African community: results from the Ibadan Study of Aging. *Journal of Psychosomatic Research*, *61*(3), 327–333. <https://doi.org/10.1016/j.jpsychores.2006.07.016>
- Gureje, O., Ogunniyi, A., Kola, L., & Abiona, T. (2011). Incidence of and risk factors for dementia in the Ibadan study of aging. *Journal of the American Geriatrics Society*, *59*(5), 869–874. <https://doi.org/10.1111/j.1532-5415.2011.03374.x>
- Gureje, O., Ogunniyi, A., Kola, L., & Afolabi, E. (2006). Functional disability in elderly Nigerians: Results from the Ibadan Study of Aging. *Journal of the American Geriatrics Society*, *54*(11), 1784–1789. <https://doi.org/10.1111/j.1532-5415.2006.00944.x>
- Gureje, O., Oladeji, B. D., Abiona, T., & Chatterji, S. (2014). Profile and determinants of successful aging in the Ibadan study of ageing. *Journal of the American Geriatrics Society*, *62*(5), 836–842. <https://doi.org/10.1111/jgs.12802>

- Gureje, O., Oladeji, B. D., Abiona, T., Makanjuola, V., & Esan, O. (2011). The natural history of insomnia in the Ibadan study of ageing. *Sleep, 34*(7), 965–973. <https://doi.org/10.5665/SLEEP.1138>
- Gutiérrez, M., Tomás, J. M., Sancho, P., Galiana, L., & Francisco, E. H. (2014). Percepción de calidad de vida en una muestra de ancianos angoleños. *Revista de Psicología Social, 29*(2), 346–370. <https://doi.org/10.1080/02134748.2014.918825>
- Gyasi, R. M., Abass, K., & Adu-Gyamfi, S. (2020). How do lifestyle choices affect the link between living alone and psychological distress in older age? Results from the AgeHeaPsyWel-HeaSeeB study. *BMC public health, 20*(1), 1-9.
- Gyasi, R. M., Adam, A. M., & Phillips, D. R. (2019). Financial inclusion, Health-Seeking behavior, and health outcomes among older adults in Ghana. *Research on aging, 41*(8), 794-820.
- Gyasi, R. M., Obeng, B., & Yeboah, J. Y. (2020). Impact of food insecurity with hunger on mental distress among community-dwelling older adults. *PloS one, 15*(3), e0229840.
- Gyasi, R. M., Peprah, P., & Appiah, D. O. (2020). Association of food insecurity with psychological disorders: Results of a population-based study among older people in Ghana. *Journal of affective disorders, 270*, 75-82.
- Gyasi, R. M., & Phillips, D. R. (2020). Risk of psychological distress among community-dwelling older adults experiencing spousal loss in Ghana. *The Gerontologist, 60*(3), 416-427.
- Gyasi, R. M., Phillips, D. R., & Amoah, P. A. (2020). Multidimensional social support and health services utilization among noninstitutionalized older persons in Ghana. *Journal of Aging and Health, 32*(3-4), 227-239.
- Gyasi, R. M., Phillips, D. R., Asante, F., & Boateng, S. (2020). Physical activity and predictors of loneliness in community-dwelling older adults: The role of social connectedness. *Geriatric Nursing*.
- Gyasi, R. M., & Phillips, D. R. (2018). Gender, self-rated health and functional decline among community-dwelling older adults. *Archives of Gerontology and Geriatrics, 77*, 174–183. <https://doi.org/10.1016/j.archger.2018.05.010>
- Hao, G., Bishwajit, G., Tang, S., Nie, C., Ji, L., & Huang, R. (2017). Social participation and perceived depression among elderly population in South Africa. *Clinical Interventions in Aging, 12*, 971–976. <https://doi.org/10.2147/CIA.S137993>
- Hendrie, H. C., Baiyewu, O., Lane, K. A., Purnell, C., Gao, S., Hake, A., Ogunniyi, A., Gureje, O., Unverzagt, F. W., Murrell, J., Deeg, M. A., & Hall, K. (2013). Homocysteine levels and dementia risk in Yoruba and African Americans. *International Psychogeriatrics, 25*(11), 1859–1866.

<https://doi.org/10.1017/S1041610213001294>

- Heyns, C. F., Fisher, M., Lecuona, A., & van der Merwe, A. (2011). Prostate cancer among different racial groups in the western cape: Presenting features and management. *South African Medical Journal*, *101*(4), 267–270. <https://doi.org/10.7196/samj.4420>
- Heyns, C. F., Mathee, S., Isaacs, A., Kharwa, A., De Beer, P. M., & Pretorius, M. A. (2003). Problems with prostate specific antigen screening for prostate cancer in the primary healthcare setting in South Africa. *BJU International*, *91*(9), 785–788. <https://doi.org/10.1046/j.1464-410X.2003.04241.x>
- Hien, H., Berthé, A., Drabo, M. K., Konaté, B., Toé, N., Tou, F., Adiara, M., Badini-Kinda, F., Ouédraogo, M., Meda, N., & Macq, J. (2016). *Point of view of older adults on the potentially inappropriate medications prescribing in primary care facilities in Bobo-Dioulasso, Burkina Faso*. *Revue d'Epidemiologie et de Sante Publique*. <https://doi.org/10.1016/j.respe.2015.09.009>
- Hien, Hervé, Berthé, A., Drabo, M. K., Meda, N., Konaté, B., Tou, F., Badini-Kinda, F., & Macq, J. (2014). Prevalence and patterns of multimorbidity among the elderly in Burkina Faso: Cross-sectional study. *Tropical Medicine and International Health*, *19*(11), 1328–1333. <https://doi.org/10.1111/tmi.12377>
- Hontelez, J. A. C., Lurie, M. N., Newell, M. L., Bakker, R., Tanser, F., Bärnighausen, T., Baltussen, R., & De Vlas, S. J. (2011). Ageing with HIV in South Africa. *AIDS*, *25*(13), 1665–1667. <https://doi.org/10.1097/QAD.0b013e32834982ea>
- Hosegood, V., & Timæus, I. M. (2005). The impact of adult mortality on the living arrangements of older people in rural South Africa. *Ageing and Society*, *25*(3), 431–444. <https://doi.org/10.1017/S0144686X0500365X>
- Houser, N., Baiden, P., & Fuller-Thomson, E. (2017). Diabetes and Hypertension in Congolese Church Personnel: An Emerging Epidemic? *Journal of Community Health*, *42*(3), 453–460. <https://doi.org/10.1007/s10900-016-0276-5>
- Huang, R., Ghose, B., & Tang, S. (2020). Effect of financial stress on self-rereported health and quality of life among older adults in five developing countries: a cross sectional analysis of WHO-SAGE survey. *BMC geriatrics*, *20*(1), 1-12.
- Hughes, G. D., Aboyade, O. M., Clark, B. L., & Puoane, T. R. (2013). The prevalence of traditional herbal medicine use among hypertensives living in South African communities. *BMC Complementary and Alternative Medicine*, *13*, 38. <https://doi.org/10.1186/1472-6882-13-38>
- Ibrahim, N., Pozo-Martin, F., & Gilbert, C. (2015). Direct non-medical costs double the total direct costs to patients undergoing cataract surgery in Zamfara state, Northern Nigeria: A case series. *BMC Health Services Research*, *15*(1). <https://doi.org/10.1186/s12913-015-0831-2>



- Ice, G. H., Sadruddin, A. F. A., Vagedes, A., Yogo, J., & Juma, E. (2012). Stress associated with caregiving: An examination of the stress process model among Kenyan Luo elders. *Social Science and Medicine*, 74(12), 2020–2027. <https://doi.org/10.1016/j.socscimed.2012.02.018>
- Ice, G. H., Yogo, J., Heh, V., & Juma, E. (2010). The Impact of Caregiving on the Health and Well-being of Kenyan Luo Grandparents. *Research on Aging*, 32(1), 40–66. <https://doi.org/10.1177/0164027509348128>
- Ice, G. H., Zidron, A., & Juma, E. (2008). Health and health perceptions among Kenyan grandparents. *Journal of Cross-Cultural Gerontology*, 23(2), 111–129. <https://doi.org/10.1007/s10823-008-9063-9>
- Igbokwe, C. C., Ejeh, V. J., Agbaje, O. S., Umoke, P. I. C., Iweama, C. N., & Ozoemena, E. L. (2020). Prevalence of loneliness and association with depressive and anxiety symptoms among retirees in Northcentral Nigeria: a cross-sectional study. *BMC geriatrics*, 20, 1-10.
- Jacobs, P., Richards, J. D., & Ben-Arie, O. (1984). The coloured elderly in Cape Town--a psychosocial, psychiatric and medical community survey. Part IV. Haematological values. *South African Medical Journal = Suid-Afrikaanse Tydskrif Vir Geneeskunde*, 65(1), 16–18. <http://www.ncbi.nlm.nih.gov/pubmed/6695241>
- Jardim, T. V., Witham, M. D., Abrahams-Gessel, S., Gómez-Olivé, F. X., Tollman, S., Berkman, L., & Gaziano, T. A. (2018). Cardiovascular Disease Profile of the Oldest Adults in Rural South Africa: Data from the HAALSI Study (Health and Aging in Africa: Longitudinal Studies of INDEPTH Communities). *Journal of the American Geriatrics Society*, 66(11), 2151–2157. <https://doi.org/10.1111/jgs.15567>
- Jésus, P., Guerchet, M., Mouanga, A. M., Mbelesso, P., Preux, P. M., & Desport, J. C. (2013). *Factors associated with nutritional status in elderly living in two cities of central Africa: The EDAC study*. *Annals of Nutrition and Metabolism*. [http://www.embase.com/search/results?subaction=viewrecord&from=export&id=L71179590%5Cnhttp://dx.doi.org/10.1159/000354245%5Cnhttp://sfx.harvard.edu/sfx\\_local?sid=EMBASE&issn=02506807&id=doi:10.1159%2F000354245&atitle=Factors+associated+with+nutritiona](http://www.embase.com/search/results?subaction=viewrecord&from=export&id=L71179590%5Cnhttp://dx.doi.org/10.1159/000354245%5Cnhttp://sfx.harvard.edu/sfx_local?sid=EMBASE&issn=02506807&id=doi:10.1159%2F000354245&atitle=Factors+associated+with+nutritiona)
- Jingi, A. M., Kuate, L. M., & Noubiap, J. J. (2017). A case management of hypertension in the elderly in Africa: Lessons from granny. *Pan African Medical Journal*, 26. <https://doi.org/10.11604/pamj.2017.26.165.10660>
- Joffe, B. I., Seftel, H. C., Goldberg, R. C., Bersohn, I., & Hackeng, W. H. (1975). *Metabolic bone disease in the elderly. Biochemical studies in three different racial groups living in South Africa*. *South African Medical Journal*. <https://pubmed.ncbi.nlm.nih.gov/1154141/>

- Kakongi, N., Rukundo, G. Z., Gelaye, B., Wakida, E. K., Obua, C., & Okello, E. S. (2020). Exploring pathways to Hospital Care for Patients with Alzheimer's disease and related dementias in rural South Western Uganda. *BMC health services research*, *20*, 1-12.
- Kalilemba, A., Preet, R., & Stewart Williams, J. (2016). Common risk factors and edentulism in adults, aged 50 years and over, in China, Ghana, India and South Africa: Results from the WHO Study on global AGEing and adult health (SAGE). *BMC Oral Health*, *17*(1). <https://doi.org/10.1186/s12903-016-0256-2>
- Kalu, M. E., Vlachantoni, A., & Norman, K. E. (2019). Knowledge about risk factors for falls and practice about fall prevention in older adults among physiotherapists in Nigeria. *Physiotherapy Research International*, *24*(1), e1742. <https://doi.org/10.1002/pri.1742>
- Kalula, S.Z., Ferreira, M., Thomas, K. G. F., de Villiers, L., Joska, J. A., Geffen, L. N., Kalula, S. Z., Ferreira, M., Thomas, K. G. F., de Villiers, L., Joska, J. A., & Geffen, L. N. (2010). *Profile and management of patients at a memory clinic*. South African Medical Journal. [http://www.embase.com/search/results?subaction=viewrecord&from=export&id=L359159661%5Cnhttp://sfx.hul.harvard.edu/sfx\\_local?sid=EMBASE&isn=02569574&id=doi:&atitle=Profile+and+management+of+patients+at+a+memory+clinic&stitle=S.+Afr.+Med.+J.&title=South+Af](http://www.embase.com/search/results?subaction=viewrecord&from=export&id=L359159661%5Cnhttp://sfx.hul.harvard.edu/sfx_local?sid=EMBASE&isn=02569574&id=doi:&atitle=Profile+and+management+of+patients+at+a+memory+clinic&stitle=S.+Afr.+Med.+J.&title=South+Af)
- Kalula, Sebastiana Z., Ferreira, M., Swingler, G. H., & Badri, M. (2015). Ethnic differences in rates and causes of falls in an urban community-dwelling older population in South Africa. In *Journal of the American Geriatrics Society* (Vol. 63, Issue 2, pp. 403–404). Blackwell Publishing Inc. <https://doi.org/10.1111/jgs.13277>
- Kalula, Sebastiana Z., Ferreira, M., Swingler, G. H., Badri, M., & Sayer, A. A. (2017). Methodological challenges in a study on falls in an older population of cape town, South Africa. *African Health Sciences*, *17*(3), 912–922. <https://doi.org/10.4314/ahs.v17i3.35>
- Kalula, Sebastiana Zimba, de Villiers, L., Ross, K., & Ferreira, M. (2006). *Management of older patients presenting after a fall - An accident and emergency department audit*. South African Medical Journal. <https://doi.org/10.7196/SAMJ.1204>
- Kalula, Sebastiana Zimba, Ferreira, M., Swingler, G. H., & Badri, M. (2016). Risk factors for falls in older adults in a South African Urban Community Physical functioning, physical health and activity. *BMC Geriatrics*, *16*(1). <https://doi.org/10.1186/s12877-016-0212-7>
- Karstaedt, A. S., & Bolhaar, M. (2014). Tuberculosis in older adults in Soweto, South Africa. *International Journal of Tuberculosis and Lung Disease*, *18*(10), 1220–1222. <https://doi.org/10.5588/ijtld.14.0210>

- Kellett-Wright, J., Flatt, A., Eaton, P., Urasa, S., Howlett, W., Dekker, M., ... & Paddick, S. M. (2020). Screening for HIV-Associated Neurocognitive Disorder (HAND) in Adults Aged 50 and Over Attending a Government HIV Clinic in Kilimanjaro, Tanzania. Comparison of the International HIV Dementia Scale (IHDS) and IDEA Six Item Dementia Screen. *AIDS and Behavior*, 1-12.
- Kerr, P. P., & Schulze, S. (2004). Factors that influence retirement self-actualisation. *Health SA Gesondheid*, 9(4). <https://doi.org/10.4102/hsag.v9i4.177>
- Kimuna, S. R., & Makiwane, M. (2007). Older people as resources in South Africa: Mpumalanga households. *Journal of Aging and Social Policy*, 19(1), 97–114. [https://doi.org/10.1300/J031v19n01\\_06](https://doi.org/10.1300/J031v19n01_06)
- Kinyanda, E., Kuteesa, M., Scholten, F., Mugisha, J., Baisley, K., & Seeley, J. (2016). Risk of major depressive disorder among older persons living in HIV-endemic central and southwestern Uganda. *AIDS Care - Psychological and Socio-Medical Aspects of AIDS/HIV*, 28(12), 1516–1521. <https://doi.org/10.1080/09540121.2016.1191601>
- Kiplagat, J., Mwangi, A., Chasela, C., & Huschke, S. (2019). Challenges with seeking HIV care services: Perspectives of older adults infected with HIV in western Kenya. *BMC Public Health*, 19(1), 929. <https://doi.org/10.1186/s12889-019-7283-2>
- Klemz, B. R., Boshoff, C., Mazibuko, N. E., & Asquith, J. A. (2015). The Effect of Altruism on the Spending Behavior of Elderly Caregivers of Family Members With HIV/AIDS in South African Townships. *Health Marketing Quarterly*, 32(1), 81–95. <https://doi.org/10.1080/07359683.2015.1000747>
- Kobayashi, L. C., Mateen, F. J., Montana, L., Wagner, R. G., Kahn, K., Tollman, S. M., & Berkman, L. F. (2019). Cognitive function and impairment in older, rural south african adults: Evidence from “health and aging in Africa: A longitudinal study of an INDEPTH Community in Rural South Africa.” *Neuroepidemiology*, 52(1–2), 32–40. <https://doi.org/10.1159/000493483>
- Kolbe-Alexander, T. L., Lambert, E. V., Harkins, J. B., & Ekelund, U. (2006). Comparison of two methods of measuring physical activity in South African older adults. *Journal of Aging and Physical Activity*, 14(1), 98–114. <https://doi.org/10.1123/japa.14.1.98>
- Kolbe-Alexander, T. L., Pacheco, K., Tomaz, S. A., Karpul, D., & Lambert, E. V. (2015). The relationship between the built environment and habitual levels of physical activity in South African older adults: A pilot study Health behavior, health promotion and society. *BMC Public Health*, 15(1), 518. <https://doi.org/10.1186/s12889-015-1853-8>
- Koyanagi, A., Veronese, N., Stubbs, B., Vancampfort, D., Stickley, A., Oh, H., Shin, J. Il, Jackson, S., Smith, L., & Lara, E. (2019). Food insecurity is

associated with mild cognitive impairment among middle-aged and older adults in south africa: Findings from a nationally representative survey. *Nutrients*, 11(4), 749. <https://doi.org/10.3390/nu11040749>

Kretchy, I. A., Koduah, A., Ohene-Agyei, T., Boima, V., & Appiah, B. (2020). The association between diabetes-related distress and medication adherence in adult patients with type 2 diabetes mellitus: a cross-sectional study. *Journal of diabetes research*, 2020.

Krige, J. E. J. (2010). *Melanoma in black South Africans*. South African Journal of Surgery. <https://doi.org/10.7196/sajs.777>

Kunna, R., San Sebastian, M., & Stewart Williams, J. (2017). Measurement and decomposition of socioeconomic inequality in single and multimorbidity in older adults in China and Ghana: Results from the WHO study on global AGEing and adult health (SAGE). *International Journal for Equity in Health*, 16(1). <https://doi.org/10.1186/s12939-017-0578-y>

Kuteesa, M. O., Seeley, J., Cumming, R. G., & Negin, J. (2012). Older people living with HIV in Uganda: Understanding their experience and needs. *African Journal of AIDS Research*, 11(4), 295–305. <https://doi.org/10.2989/16085906.2012.754829>

Kuteesa, M. O., Wright, S., Seeley, J., Mugisha, J., Kinyanda, E., Kakembo, F., Mwesigwa, R., & Scholten, F. (2014). Experiences of HIV-related stigma among HIV-positive older persons in Uganda – a mixed methods analysis. *Sahara J*, 11(1), 126–137. <https://doi.org/10.1080/17290376.2014.938103>

Kyobutungi, C., Egondi, T., & Ezech, A. (2010). The health and well-being of older people in Nairobi's slums. *Global Health Action*, 3(1), 2138. <https://doi.org/10.3402/gha.v3i0.2138>

Kyobutungi, C., Ezech, A. C., Zulu, E., & Falkingham, J. (2009). HIV/AIDS and the health of older people in the slums of Nairobi, Kenya: Results from a cross sectional survey. *BMC Public Health*, 9(1), 153. <https://doi.org/10.1186/1471-2458-9-153>

Lambert, S. D., Bowe, S. J., Livingston, P. M., Heckel, L., Cook, S., Kowal, P., & Orellana, L. (2017). Impact of informal caregiving on older adults' physical and mental health in low-income and middle-income countries: A cross-sectional, secondary analysis based on the WHO's Study on global AGEing and adult health (SAGE). *BMJ Open*, 7(11), 17236. <https://doi.org/10.1136/bmjopen-2017-017236>

Lartey, S. T., Magnussen, C. G., Si, L., Boateng, G. O., de Graaff, B., Biritwum, R. B., Minicuci, N., Kowal, P., Blizzard, L., & Palmer, A. J. (2019). Rapidly increasing prevalence of overweight and obesity in older Ghanaian adults from 2007-2015: Evidence from Who-sage waves 1 & 2. *PLoS ONE*, 14(8). <https://doi.org/10.1371/journal.pone.0215045>

- Lasisi, A. O., & Gureje, O. (2014). *Prevalence and correlates of dizziness in the Ibadan Study of Ageing*. *Ear, Nose and Throat Journal*.  
<https://pubmed.ncbi.nlm.nih.gov/24817240/>
- Lasisi, A. O., Abiona, T., & Gureje, O. (2010). Tinnitus in the elderly: Profile, correlates, and impact in the Nigerian study of ageing. *Otolaryngology - Head and Neck Surgery*, 143(4), 510–515. <https://doi.org/10.1016/j.otohns.2010.06.817>
- Lazenby, J. M., & Olshvevski, J. (2012). Place of death among Botswana's oldest old. *Omega*, 65(3), 173–187. <https://doi.org/10.2190/OM.65.3.a>
- Le Roux, A. A., & Nadvi, S. S. (2007). Acute extradural haematoma in the elderly. *British Journal of Neurosurgery*, 21(1), 16–20.  
<https://doi.org/10.1080/02688690601170692>
- Lekalakala-Mokgele, E. (2014). Understanding of the risk of HIV infection among the elderly in Ga-Rankuwa, South Africa. *Sahara J*, 11(1), 67–75.  
<https://doi.org/10.1080/17290376.2014.931816>
- Lekalakala-Mokgele, E. (2014). Understanding of the risk of HIV infection among the elderly in Ga-Rankuwa, South Africa. *Sahara J*, 11(1), 67–75.  
<https://doi.org/10.1080/17290376.2014.931816>
- Lekalakala-Mokgele, E. (2016). Exploring gender perceptions of risk of HIV infection and related behaviour among elderly men and women of ga-rankuwa, Gauteng province, South Africa. *Sahara J*, 13(1), 88–95. <https://doi.org/10.1080/17290376.2016.1218790>
- Lekpa, F. K., Ndongo, S., Ka, O., Zeba, D., Compaoré, C., Pouye, A., Ka, M. M., & Diop, T. M. (2013). Socio-demographic and clinical profile of chronic pain with neuropathic characteristics in sub-Saharan African elderly. *European Journal of Pain*, 17(6), 939–943. <https://doi.org/10.1002/j.1532-2149.2012.00243.x>
- Lenger, V., de Viliers, C., & Louw, S. J. (1996). *Informant questionnaires as screening measures to detect dementia. A pilot study in the South African context*. *South African Medical Journal = Suid-Afrikaanse Tydskrif Vir Geneeskunde*. <https://pubmed.ncbi.nlm.nih.gov/9180766/>
- Leuning, C., Small, L., & Van Dyk, A. (2000). Meanings and expressions of care and caring for elders in urban Namibian families: *Curationis*, 23(3).  
<https://doi.org/10.4102/curationis.v23i3.711>
- Lewis, E. G., Banks, J. E., Paddick, S., Dotchin, C., Gray, W., Walker, R., & Urasa, S. (2017). RISK FACTORS FOR PREVALENT DELIRIUM IN OLDER

MEDICAL INPATIENTS IN TANZANIA. *Innovation in Aging*, 1(suppl\_1), 1283–1284. <https://doi.org/10.1093/geroni/igx004.4685>

- Longdon, A. R., Paddick, S. M., Kisoli, A., Dotchin, C., Gray, W. K., Dewhurst, F., Chaote, P., Teodorczuk, A., Dewhurst, M., Jusabani, A. M., & Walker, R. (2013). The prevalence of dementia in rural Tanzania: A cross-sectional community-based study. *International Journal of Geriatric Psychiatry*, 28(7), 728–737. <https://doi.org/10.1002/gps.3880>
- Lopes Ibanez-Gonzalez, D., & Tollman, S. M. (2015). Clinics and Churches: Lifeworlds and health-seeking practices of older women with noncommunicable disease in rural South Africa. *BMC International Health and Human Rights*, 15(1). <https://doi.org/10.1186/s12914-015-0051-1>
- Lewis, M. J., & Hughes, J. (1997). A comparison of the effects of sacred and secular music on elderly people. *Journal of Psychology: Interdisciplinary and Applied*, 131(1), 45–55. <https://doi.org/10.1080/00223989709603503>
- Lwanga, I., Nabaggala, M. S., Kiragga, A., Calcagno, A., Guaraldi, G., Lamorde, M., & Castelnuovo, B. (2020). Implementing routine physical function screening among elderly HIV-positive patients in Uganda. *AIDS care*, 32(11), 1467-1470.
- Mabaso, R. G., & Oduntan, O. A. (2016). Knowledge and practices related to diabetes mellitus among adults with diabetes in the Mopani District, Limpopo Province, South Africa. *African Vision and Eye Health*, 75(1). <https://doi.org/10.4102/aveh.v75i1.324>
- Mabeku, L. B. K., Ngamga, M. L. N., & Leundji, H. (2020). Helicobacter pylori infection, a risk factor for Type 2 diabetes mellitus: a hospital-based cross-sectional study among dyspeptic patients in Douala-Cameroon. *Scientific reports*, 10(1), 1-11.
- Macia, E., Duboz, P., & Gueye, L. (2012). Prevalence, awareness, treatment and control of hypertension among adults 50 years and older in Dakar, Senegal. *Cardiovascular Journal of Africa*, 23(5), 265–269. <https://doi.org/10.5830/CVJA-2011-039>
- Macia, Enguerran, Duboz, P., Montepare, J. M., & Gueye, L. (2012). Age identity, self-rated health, and life satisfaction among older adults in Dakar, Senegal. *European Journal of Ageing*, 9(3), 243–253. <https://doi.org/10.1007/s10433-012-0227-7>
- Macia, Enguerran, Duboz, P., Montepare, J. M., & Gueye, L. (2015). Exploring Life Satisfaction Among Older Adults in Dakar. *Journal of Cross-Cultural Gerontology*, 30(4), 377–391. <https://doi.org/10.1007/s10823-015-9275-8>
- Manne-Goehler, J., Kakuhikire, B., Abaasabyoona, S., Bärnighausen, T. W., Okello, S., Tsai, A. C., & Siedner, M. J. (2019). Depressive Symptoms Before and After Antiretroviral Therapy Initiation Among Older-Aged Individuals in Rural Uganda. *AIDS and Behavior*, 23(3), 564–571.

<https://doi.org/10.1007/s10461-018-2273-4>

Maritz, M., Fourie, C. M. T., Van Rooyen, J. M., & Schutte, A. E. (2018). Evaluating several biomarkers as predictors of aortic stiffness in young and older Africans, not consuming alcohol based on self-report. *Diabetes Research and Clinical Practice*, *142*, 312–320.

<https://doi.org/10.1016/j.diabres.2018.05.048>

Martinez, P., Lien, L., Landheim, A., Kowal, P., & Clausen, T. (2014). Quality of life and social engagement of alcohol abstainers and users among older adults in South Africa. *BMC Public Health*, *14*(1), 316. <https://doi.org/10.1186/1471-2458-14-316>

Matlho, K., Randell, M., Lebelonyane, R., Kefas, J., Driscoll, T., & Negin, J. (2019). HIV prevalence and related behaviours of older people in Botswana — secondary analysis of the Botswana AIDS Impact Survey (BAIS) IV. *African Journal of AIDS Research*, *18*(1), 18–26.

<https://doi.org/10.2989/16085906.2018.1552162>

Matovu, S. N., & Wallhagen, M. I. (2020). Perceived Caregiver Stress, Coping, and Quality of Life of Older Ugandan Grandparent-Caregivers. *Journal of Cross-Cultural Gerontology*, *35*(3), 311-328.

Matovu, S., Rankin, S., & Wallhagen, M. (2020). Ugandan Jajjas: Antecedents and rewards of caring for grandchildren in the context of HIV. *International Journal of Older People Nursing*, *15*(2), e12304.

Mbada, C. E., Adeniyi, O. A., Idowu, O. A., Fatoye, C. T., Odole, A. C., & Fatoye, F. (2020). Cross-cultural adaptation and psychometric evaluation of the Yoruba version of the Back beliefs questionnaire among patients with chronic low-back pain. *Health and quality of life outcomes*, *18*(1), 1-9.

Mbui, J. M., Oluka, M. N., Guantai, E. M., Sinei, K. A., Achieng, L., Baker, A., Jande, M., Masele, A., & Godman, B. (2017). Prescription patterns and adequacy of blood pressure control among adult hypertensive patients in Kenya; findings and implications. *Expert Review of Clinical Pharmacology*, *10*(11), 1263–1271. <https://doi.org/10.1080/17512433.2017.1371590>

McKinnon, B., Harper, S., & Moore, S. (2013). The relationship of living arrangements and depressive symptoms among older adults in sub-Saharan Africa. *BMC Public Health*, *13*(1), 682. <https://doi.org/10.1186/1471-2458-13-682>

Meiring, P., Blake, A. J., & Grobbelaar, J. P. (1983). *Identification and definition of the geriatric patient in a teaching hospital*. South African Medical Journal.

<https://pubmed.ncbi.nlm.nih.gov/6623267/>

- Menyanu, E., Charlton, K. E., Ware, L. J., Russell, J., Biritwum, R., & Kowal, P. (2017). Salt use behaviours of ghanaians and south africans: A comparative study of knowledge, attitudes and practices. *Nutrients*, 9(9), 1211. <https://doi.org/10.3390/nu9090939>
- Mhaka-Mutepfa, M., Cumming, R., & Mpofu, E. (2014). Grandparents Fostering Orphans: Influences of Protective Factors on Their Health and Well-Being. *Health Care for Women International*, 35(7–9), 1022–1039. <https://doi.org/10.1080/07399332.2014.916294>
- Minicuci, N., Biritwum, R. B., Mensah, G., Yawson, A. E., Naidoo, N., Chatterji, S., & Kowal, P. (2014). Sociodemographic and socioeconomic patterns of chronic non-communicable disease among the older adult population in Ghana. *Global Health Action*, 7(1). <https://doi.org/10.3402/gha.v7.21292>
- Mkhonto, F., & Hanssen, I. (2018). When people with dementia are perceived as witches. Consequences for patients and nurse education in South Africa. *Journal of Clinical Nursing*, 27(1–2), e169–e176. <https://doi.org/10.1111/jocn.13909>
- Molete, M. P., Yengopal, V., & Moorman, J. (2014). *Oral health needs and barriers to accessing care among the elderly in Johannesburg*. SADJ : Journal of the South African Dental Association = Tydskrif van Die Suid-Afrikaanse Tandheelkundige Vereniging. <https://pubmed.ncbi.nlm.nih.gov/26548224/>
- Moreno-Agostino, D., Stone, A. A., Schneider, S., Koskinen, S., Leonardi, M., Naidoo, N., ... & Chatterji, S. (2019). Are retired people higher in experiential wellbeing than working older adults? A time use approach. *Emotion*.
- Mtowa, A., Gerritsen, A. A. M., Mtenga, S., Mwangome, M., & Geubbels, E. (2017). Socio-demographic inequalities in HIV testing behaviour and HIV prevalence among older adults in rural Tanzania, 2013. *AIDS Care - Psychological and Socio-Medical Aspects of AIDS/HIV*, 29(9), 1162–1168. <https://doi.org/10.1080/09540121.2017.1308462>
- Muchiri, J. W., Gericke, G. J., & Rheeder, P. (2012). Needs and preferences for nutrition education of type 2 diabetic adults in a resource-limited setting in South Africa. *Health SA Gesondheid*, 17(1), 13. <https://doi.org/10.4102/hsag.v17i1.614>
- Mugisha, J. O., Schatz, E. J., Hansen, C., Leary, E., Negin, J., Kowal, P., & Seeley, J. (2018). Social engagement and survival in people aged 50 years and over living with HIV and without HIV in Uganda: a prospective cohort study. *African Journal of AIDS Research*, 17(4), 333–340. <https://doi.org/10.2989/16085906.2018.1542322>
- Mugisha, J. O., Schatz, E. J., Negin, J., Mwaniki, P., Kowal, P., & Seeley, J. (2017). Timing of Most Recent Health Care Visit by Older People Living With and



- Without HIV. *International Journal of Aging & Human Development*, 85(1), 18–32. <https://doi.org/10.1177/0091415016680071>
- Mugisha, J. O., Schatz, E. J., Randell, M., Kuteesa, M., Kowal, P., Negin, J., & Seeley, J. (2016). Chronic disease, risk factors and disability in adults aged 50 and above living with and without HIV: findings from the Wellbeing of Older People Study in Uganda. *Global Health Action*, 9(1). <https://doi.org/10.3402/gha.v9.31098>
- Mugisha, J. O., Schatz, E., Seeley, J., & Kowal, P. (2015). Gender perspectives in care provision and care receipt among older people infected and affected by HIV in Uganda. *African Journal of AIDS Research*, 14(2), 159–167. <https://doi.org/10.2989/16085906.2015.1040805>
- Mushi, D., Rongai, A., Paddick, S. M., Dotchin, C., Mtuya, C., & Walker, R. (2014). Social representation and practices related to dementia in Hai District of Tanzania. *BMC Public Health*, 14(1). <https://doi.org/10.1186/1471-2458-14-260>
- Mwanyangala, M., Mayombana, C., Urassa, H., Charles, J., Mahutanga, C., Abdullah, S., & Nathan, R. (2010). Health status and quality of life among older adults in rural Tanzania. *Global Health Action*, 3(1), 2142. <https://doi.org/10.3402/gha.v3i0.2142>
- Myroniuk, T. W. (2017). Marital Dissolutions and the Health of Older Individuals in a Rural African Context. *Journals of Gerontology - Series B Psychological Sciences and Social Sciences*, 72(4), 656–664. <https://doi.org/10.1093/geronb/gbw077>
- Naah, F. L., Njong, A. M., & Kimengsi, J. N. (2020). Determinants of Active and Healthy Ageing in Sub-Saharan Africa: Evidence from Cameroon. *International journal of environmental research and public health*, 17(9), 3038.
- Nadasen, K. (2008). Life without line dancing and the other activities would be too dreadful to imagine: An increase in social activity for older women. *Journal of Women and Aging*, 20(3–4), 329–342. <https://doi.org/10.1080/08952840801985060>
- Naidoo, K., & Van Wyk, J. (2019). What the elderly experience and expect from primary care services in KwaZulu-Natal, South Africa. *African Journal of Primary Health Care & Family Medicine*, 11(1). <https://doi.org/10.4102/phcfm.v11i1.2100>
- Namale, G., Kamacooko, O., Makhoba, A., Mugabi, T., Ndagire, M., Ssanyu, P., ... & Newton, R. (2020). Predictors of 30-day and 90-day mortality among hemorrhagic and ischemic stroke patients in urban Uganda: a prospective hospital-based cohort study. *BMC Cardiovascular Disorders*, 20(1), 1-11.
- Nanji, K., Kherani, I. N., Damji, K. F., Nyenze, M., Kiage, D., & Tennant, M. T. (2020). The muranga teleophthalmology study: A comparison of virtual

- (teleretina) assessment with in-person clinical examination to diagnose diabetic retinopathy and age-related macular degeneration in kenya. *Middle East African Journal of Ophthalmology*, 27(2), 91.
- Nash, E. S., & De Meiring, P. V. (1983). *The Coloured elderly in Cape Town - a psychological, psychiatric and medical community survey. Part III. A survey of physical disorders and disabilities*. South African Medical Journal. <https://pubmed.ncbi.nlm.nih.gov/6229889/>
- Ndou, T., van Zyl, G., Hlahane, S., & Goudge, J. (2013). A rapid assessment of a community health worker pilot programme to improve the management of hypertension and diabetes in Emfuleni sub-district of Gauteng Province, South Africa. *Global Health Action*, 6, 19228. <https://doi.org/10.3402/gha.v6i0.19228>
- Negin, J., Cumming, R., de Ramirez, S. S., Abimbola, S., & Sachs, S. E. (2011). Risk factors for non-communicable diseases among older adults in rural Africa. *Tropical Medicine and International Health*, 16(5), 640–646. <https://doi.org/10.1111/j.1365-3156.2011.02739.x>
- Negin, J., Geddes, L., Brennan-Ing, M., Kuteesa, M., Karpiak, S., & Seeley, J. (2016). Sexual Behavior of Older Adults Living with HIV in Uganda. *Archives of Sexual Behavior*, 45(2), 441–449. <https://doi.org/10.1007/s10508-015-0582-5>
- Negin, J., Martiniuk, A., Cumming, R. G., Naidoo, N., Phaswana-Mafuya, N., Madurai, L., Williams, S., & Kowal, P. (2012). Prevalence of HIV and chronic comorbidities among older adults. *AIDS*, 26(SUPPL.1). <https://doi.org/10.1097/QAD.0b013e3283558459>
- Negin, J., Nemser, B., Cumming, R., Lelerai, E., Amor, Y. Ben, & Pronyk, P. (2012). HIV attitudes, awareness and testing among older adults in Africa. *AIDS and Behavior*, 16(1), 63–68. <https://doi.org/10.1007/s10461-011-9994-y>
- Negin, J., Randell, M., Raban, M. Z., Nyirenda, M., Kalula, S., Madurai, L., & Kowal, P. (2017). Health expenditure and catastrophic spending among older adults living with HIV. *Global Public Health*, 12(10), 1282–1296. <https://doi.org/10.1080/17441692.2016.1173717>
- Negin, J., Wariero, J., Cumming, R. G., Mutuo, P., & Pronyk, P. M. (2010). High rates of aids-related mortality among older adults in rural Kenya. *Journal of Acquired Immune Deficiency Syndromes*, 55(2), 239–244. <https://doi.org/10.1097/QAI.0b013e3181e9b3f2>
- Njemini, R., Meyers, I., Demanet, C., Smits, J., Sosso, M., & Mets, T. (2002). The prevalence of autoantibodies in an elderly sub-Saharan African population. *Clinical and Experimental Immunology*, 127(1), 99–106. <https://doi.org/10.1046/j.1365-2249.2002.01713.x>
- Njemini, R., Smits, J., Demanet, C., Sosso, M., & Mets, T. (2011). Circulating heat shock protein 70 (Hsp70) in elderly members of a rural population from

Cameroon: Association with infection and nutrition. *Archives of Gerontology and Geriatrics*, 53(3), 359–363.

<https://doi.org/10.1016/j.archger.2011.01.005>

Nwankwo, H. C., Akinrolie, O., Adandom, I., Obi, P. C., Ojembe, B. U., & Kalu, M. E. (2019). The clinical experiences of Nigerian physiotherapists in managing environmental and socioeconomic determinants of mobility for older adults. *Physiotherapy Theory and Practice*.

<https://doi.org/10.1080/09593985.2019.1700579>

Nwankwo, T. O., Umeh, U. A., Aniebue, U. U., Onu, J. U., & Umeh, C. R. (2020). Impact of neoadjuvant chemotherapy in improving operative intervention in the management of cervical cancer in low resource setting: a preliminary report. *The Pan African Medical Journal*, 36.

Nyanguru, A. C. (2007). *Migration and Aging: The Case of Zimbabwe: Journal of Aging & Social Policy: Vol 19, No 4*.

[https://www.tandfonline.com/doi/abs/10.1300/J031v19n04\\_04](https://www.tandfonline.com/doi/abs/10.1300/J031v19n04_04)

Nyirenda, M., Chatterji, S., Falkingham, J., Mutevedzi, P., Hosegood, V., Evandrou, M., Kowal, P., & Newell, M. L. (2012). An investigation of factors associated with the health and well-being of HIV-infected or HIV-affected older people in rural South Africa. *BMC Public Health*, 12(1), 259.

<https://doi.org/10.1186/1471-2458-12-259>

Nyirenda, M., Newell, M. L., Mugisha, J., Mutevedzi, P. C., Seeley, J., Scholten, F., & Kowal, P. (2013). Health, wellbeing, and disability among older people infected or affected by HIV in Uganda and South Africa. *Global Health Action*, 6(1). <https://doi.org/10.3402/gha.v6i0.19201>

Obi, P. C., Nwankwo, H. C., Emofe, D., Adandom, I., & Kalu, M. E. (n.d.). The Experience and Perception of Physiotherapists in Nigeria re: Fall Prevention in Recurrent-Faller Older Adults. *The Internet Journal of Allied Health Sciences and Practice*. In *nsuworks.nova.edu* (Vol. 17, Issue 2). Retrieved May 11, 2020, from <https://nsuworks.nova.edu/ijahsp>

Obuku, E. A., Parikh, S. M., Nankabirwa, V., Kakande, N. I., Mafigiri, D. K., Mayanja-Kizza, H., Kityo, C. M., Mugenyi, P. N., & Salata, R. A. (2013). Determinants of Clinician Knowledge on Aging and HIV/AIDS: A Survey of Practitioners and Policy Makers in Kampala District, Uganda. *PLoS ONE*, 8(2), e57028. <https://doi.org/10.1371/journal.pone.0057028>

Ogunyemi, A. O., Odeyemi, K. A., Kanma-Okafor, O. J., & Ladi-Akinyemi, T. W. (2018). *Health-Related Quality of Life of the Elderly in Institutional Care and Non-Institutional Care in Southwestern Nigeria: A Comparative Study*. *West African Journal of Medicine*. <http://www.ncbi.nlm.nih.gov/pubmed/29607474>

- Ojagbemi, A., Abiona, T., Luo, Z., & Gureje, O. (2018). Symptomatic and Functional Recovery From Major Depressive Disorder in the Ibadan Study of Ageing. *American Journal of Geriatric Psychiatry*, 26(6), 657–666. <https://doi.org/10.1016/j.jagp.2017.12.011>
- Ojagbemi, A., Bello, T., & Gureje, O. (2016). Cognitive Reserve, Incident Dementia, and Associated Mortality in the Ibadan Study of Ageing. *Journal of the American Geriatrics Society*, 64(3), 590–595. <https://doi.org/10.1111/jgs.14015>
- Ojagbemi, A., Bello, T., Luo, Z., & Gureje, O. (2017a). Chronic Conditions, New Onset, and Persistent Disability in the Ibadan Study of Aging. *Journals of Gerontology - Series A Biological Sciences and Medical Sciences*, 72(7), 997–1005. <https://doi.org/10.1093/gerona/glv188>
- Ojagbemi, A., Bello, T., Luo, Z., & Gureje, O. (2017b). Living Conditions, Low Socioeconomic Position, and Mortality in the Ibadan Study of Aging. *Journals of Gerontology - Series B Psychological Sciences and Social Sciences*, 72(4), 646–655. <https://doi.org/10.1093/geronb/gbv093>
- Ojagbemi, A., D'Este, C., Verdes, E., Chatterji, S., & Gureje, O. (2015). Gait speed and cognitive decline over 2 years in the Ibadan study of aging. *Gait and Posture*, 41(2), 736–740. <https://doi.org/10.1016/j.gaitpost.2015.01.011>
- Ojagbemi, A., Oladeji, B., Abiona, T., & Gureje, O. (2013). Suicidal behaviour in old age - results from the Ibadan study of ageing. *BMC Psychiatry*, 13, 80. <https://doi.org/10.1186/1471-244X-13-80>
- Ojembe, B. U., & Kalu, M. E. (2018). Describing reasons for loneliness among older people in Nigeria. *Journal of Gerontological Social Work*, 61(6), 640–658. <https://doi.org/10.1080/01634372.2018.1487495>
- Ojembe, B.U. & Kalu, M. E. (2019). *Television, radio, and telephone: Tools for reducing loneliness among older adults in Nigeria*. Gerontechnology Journal. <http://journal.gerontechnology.org/currentIssueContent.aspx?aid=1795>
- Okunade, K. S., Adetuyi, I. E., Adenekan, M., Ohazurike, E., & Anorlu, R. I. (2020). Risk predictors of early recurrence in women with epithelial ovarian cancer in Lagos, Nigeria. *The Pan African Medical Journal*, 36.
- Oladeji, B. D., Makanjuola, V. A., Esan, O. B., & Gureje, O. (2011). Chronic pain conditions and depression in the Ibadan Study of Ageing. *International Psychogeriatrics*, 23(6), 923–929. <https://doi.org/10.1017/S1041610210002322>
- Olamoyegun, M. A., Raimi, T. H., Ala, O. A., & Fadare, J. O. (2020). Mobile phone ownership and willingness to receive mHealth services among patients

- with diabetes mellitus in South-West, Nigeria. *The Pan African Medical Journal*, 37.
- Olatayo, A. A., Kubwa, O. O., & Adekunle, A. E. (2015). Sexuality in Nigerian older adults. *The Pan African Medical Journal*, 22, 315. <https://doi.org/10.11604/pamj.2015.22.315.7617>
- Ologe, F. E., Segun-Busari, S., Abdulraheem, I. S., & Afolabi, A. O. (2005). Ear diseases in elderly hospital patients in Nigeria. *Journals of Gerontology - Series A Biological Sciences and Medical Sciences*, 60(3), 404–406. <https://doi.org/10.1093/gerona/60.3.404>
- Okoh, A. E., Akinrolie, O., Bell-Gam, H. I., Adandom, I., Ibekaku, M. C., & Kalu, M. E. (2020). Nigerian healthcare workers' perception of transdisciplinary approach to older adults' care: A qualitative case study. *International Journal of Care Coordination*, 23(2-3), 92-106.
- Okoye, E. C., Akosile, C. O., Maruf, F. A., Onwuakagba, I. U., & Urama, S. T. (2020). Validation of Igbo version of the modified falls efficacy scale among community-dwelling older adults: a validation study. *Health and Quality of Life Outcomes*, 18(1), 1-9.
- Omenai, S. A., Ezenkwa, U. S., & Ajani, M. A. (2020). Mortality patterns in patients with diabetes mellitus at a Nigerian tertiary hospital: A 10-Year autopsy study. *Nigerian Postgraduate Medical Journal*, 27(2), 83.
- Onadja, Y., Atchessi, N., Soura, B. A., Rossier, C., & Zunzunegui, M. V. (2013). Gender differences in cognitive impairment and mobility disability in old age: A cross-sectional study in Ouagadougou, Burkina Faso. *Archives of Gerontology and Geriatrics*, 57(3), 311–318. <https://doi.org/10.1016/j.archger.2013.06.007>
- Onakpoya, O. H., Adeoye, A. O., Adegbehingbe, B. O., Badmus, S. A., Adewara, B. A., Awe, O. O., & Udonwa, P. A. (2020). Intraocular pressure variation after conventional extracapsular cataract extraction, manual small incision cataract surgery and phacoemulsification in an indigenous black population. *The Pan African Medical Journal*, 36.
- Onwuchewa, A., BellGam, H., & Asekomeh, G. (2009). Stroke at the University of Port Harcourt Teaching Hospital, Rivers State, Nigeria. *Tropical Doctor*, 39(3), 150–152. <https://doi.org/10.1258/td.2008.080285>
- Onwubiko, S. N., Nwachukwu, N. Z., Muomah, R. C., Okoloagu, N. M., Ngwegu, O. M., & Nwachukwu, D. C. (2020). Factors associated with depression and anxiety among glaucoma patients in a tertiary hospital South-East Nigeria. *Nigerian journal of clinical practice*, 23(3), 315.
- Osberg, L. (2015). The Hunger of Old Women in Rural Tanzania: Can Subjective Data Improve Poverty Measurement? *Review of Income and Wealth*, 61(4), 723–738. <https://doi.org/10.1111/roiw.12128>
- Oshi, D. C., Oshi, S. N., Alobu, I., & Ukwaja, K. N. (2014). Profile and Treatment Outcomes of Tuberculosis in the Elderly in Southeastern Nigeria, 2011–

2012. *PLoS ONE*, 9(11), e111910. <https://doi.org/10.1371/journal.pone.0111910>

- Ottie-Boakye, D. (2020). Coverage of non-receipt of cash transfer (Livelihood Empowerment Against Poverty) and associated factors among older persons in the Mampong Municipality, Ghana—a quantitative analysis. *BMC geriatrics*, 20(1), 1-10.
- Otitoola, O. C., Oldewage-Theron, W. N., & Egal, A. A. (2015). Trends in the development of obesity in elderly day care attendees in Sharpeville, South Africa, from 2007-2011. *South African Journal of Clinical Nutrition*, 28(1), 12–17. <https://doi.org/10.1080/16070658.2015.11734520>
- Padayachey, U., Ramlall, S., & Chipps, J. (2017). Depression in older adults: prevalence and risk factors in a primary health care sample. *South African Family Practice*, 59(2), 61–66. <https://doi.org/10.1080/20786190.2016.1272250>
- Paddick, S. M., Lewis, E. G., Duijnmaijer, A., Banks, J., Urasa, S., Tucker, L., Kisoli, A., Cletus, J., Lissu, C., Kissima, J., Dotchin, C., Gray, W. K., Muaketova-Ladinska, E., Cosker, G., & Walker, R. W. (2018). Identification of delirium and dementia in older medical inpatients in Tanzania: A comparison of screening and diagnostic methods. *Journal of the Neurological Sciences*, 385, 156–163. <https://doi.org/10.1016/j.jns.2017.12.006>
- Paddick, S.-M., Kisoli, A., Longdon, A., Dotchin, C., Gray, W. K., Chaote, P., Teodorczuk, A., & Walker, R. (2015). The prevalence and burden of behavioural and psychological symptoms of dementia in rural Tanzania. *International Journal of Geriatric Psychiatry*, 30(8), 815–823. <https://doi.org/10.1002/gps.4218>
- Paddick, Stella-Maria, Kisoli, A., Mkenda, S., Mbowe, G., Gray, W. K., Dotchin, C., Ogunniyi, A., Kisima, J., Olakehinde, O., Mushi, D., & Walker, R. W. (2017). Adaptation and validation of the Alzheimer's Disease Assessment Scale – Cognitive (ADAS-Cog) in a low-literacy setting in sub-Saharan Africa. *Acta Neuropsychiatrica*, 29(4), 244–251. <https://doi.org/10.1017/neu.2016.65>
- Paquissi, F. C., Cuvinje, A. B. P., & Cuvinje, A. B. (2016). Prevalence of Peripheral Arterial Disease among Adult Patients Attending Outpatient Clinic at a General Hospital in South Angola. *Scientifica*, 2016. <https://doi.org/10.1155/2016/2520973>
- Parag, Y., & Buccimazza, I. (2016). How long are elderly patients followed up with mammography after the diagnosis of breast cancer? A single-centre experience in a developing country. *South African Medical Journal*, 106(7), 721–723. <https://doi.org/10.7196/SAMJ.2016.v106i7.10405>
- Parmar, D., Williams, G., Dkhimi, F., Ndiaye, A., Asante, F. A., Arhinful, D. K., & Mladovsky, P. (2014). Enrolment of older people in social health protection programs in West Africa - Does social exclusion play a part? *Social Science and Medicine*, 119, 36–44. <https://doi.org/10.1016/j.socscimed.2014.08.011>

- Payne, C. F., Gómez-Olivé, F. X., Kahn, K., & Berkman, L. (2017). Physical Function in an Aging Population in Rural South Africa: Findings from HAALSI and Cross-National Comparisons with HRS Sister Studies. *Journals of Gerontology - Series B Psychological Sciences and Social Sciences*, 72(4), 665–679. <https://doi.org/10.1093/geronb/gbx030>
- Payne, C. F., Mkandawire, J., & Kohler, H.-P. (2013). Disability Transitions and Health Expectancies among Adults 45 Years and Older in Malawi: A Cohort-Based Model. *PLoS Medicine*, 10(5), e1001435. <https://doi.org/10.1371/journal.pmed.1001435>
- Payne, C. F., Wade, A., Kabudula, C. W., Davies, J. I., Chang, A. Y., Gomez-Olive, F. X., Kahn, K., Berkman, L. F., Tollman, S. M., Salomon, J. A., & Witham, M. D. (2017). Prevalence and correlates of frailty in an older rural African population: Findings from the HAALSI cohort study. *BMC Geriatrics*, 17(1), 293. <https://doi.org/10.1186/s12877-017-0694-y>
- Peil, M., Ekpenyong, S. K., & Oyeneye, O. Y. (1988). Going Home: Migration Careers of Southern Nigerians <sup/>. *International Migration Review*, 22(4), 563–585. <https://doi.org/10.1177/019791838802200402>
- Peltzer, K., & Phaswana-Mafuya, N. (2012). Cognitive functioning and associated factors in older adults in South Africa. *South African Journal of Psychiatry*, 18(4), 7. <https://doi.org/10.4102/sajpsy.v18i4.368>
- Peltzer, K. (2004). Health beliefs and prescription medication compliance among diagnosed hypertension clinic attenders in a rural South African Hospital. *Curationis*, 27(3), 15–23. <https://doi.org/10.4102/curationis.v27i3.994>
- Peltzer, K. (2012). Sociodemographic and health correlates of sleep problems and duration in older adults in South Africa. *South African Journal of Psychiatry*, 18(4), 150–156. <https://doi.org/10.7196/SAJP.369>
- Peltzer, K., & Pengpid, S. (2018). Self-reported sleep duration and its correlates with sociodemographics, health behaviours, poor mental health, and chronic conditions in rural persons 40 years and older in South Africa. *International Journal of Environmental Research and Public Health*, 15(7). <https://doi.org/10.3390/ijerph15071357>
- Peltzer, K., & Phaswana-Mafuya, N. (2013). Problem drinking and associated factors in older adults in South Africa. *African Journal of Psychiatry (South Africa)*, 16(2), 104–109. <https://doi.org/10.4314/ajpsy.v16i2.13>
- Peltzer, Karl, & Phaswana-Mafuya, N. (2012a). Patient experiences and health system responsiveness among older adults in South Africa. *Global Health*

- Action*, 5, 1–11. <https://doi.org/10.3402/gha.v5i0.18545>
- Peltzer, Karl, & Phaswana-Mafuya, N. (2012b). Tobacco use and associated factors in older adults in South Africa. *Journal of Psychology in Africa*, 22(2), 283–288. <https://doi.org/10.1080/14330237.2012.10820532>
- Peltzer, Karl, & Phaswana-Mafuya, N. (2012c). Fruit and vegetable intake and associated factors in older adults in South Africa. *Global Health Action*, 5(1), 18668. <https://doi.org/10.3402/gha.v5i0.18668>
- Peltzer, Karl, & Phaswana-Mafuya, N. (2013a). Depression and associated factors in older adults in South Africa. *Global Health Action*, 6(1). <https://doi.org/10.3402/gha.v6i0.18871>
- Peltzer, Karl, & Phaswana-Mafuya, N. (2013b). Hypertension and associated factors in older adults in South Africa. *Cardiovascular Journal of Africa*, 24(3), 66–71. <https://doi.org/10.5830/CVJA-2013-002>
- Peltzer, Karl, & Phaswana-Mafuya, N. (2013c). ARTHRITIS AND ASSOCIATED FACTORS IN OLDER ADULTS IN SOUTH AFRICA GÜNEY AFRİKA'DAKI YAŞLI BİREYLERDE ARTRİT VE KLİNİK FAKTÖRLER ÖZ. In *Turkish Journal of Geriatrics* (Vol. 16, Issue 4). <http://geriatri.dergisi.org/abstract.php?lang=en&id=770>
- Peltzer, Karl, & Phaswana-Mafuya, N. (2014). Breast and cervical cancer screening and associated factors among older adult women in South Africa. *Asian Pacific Journal of Cancer Prevention*, 15(6), 2473–2476. <https://doi.org/10.7314/APJCP.2014.15.6.2473>
- Peltzer, Karl, & Phaswana-Mafuya, N. (2017). Association between visual impairment and low vision and sleep duration and quality among older adults in South Africa. *International Journal of Environmental Research and Public Health*, 14(7). <https://doi.org/10.3390/ijerph14070811>
- Peltzer, Karl. (2017). Differences in sleep duration among four different population groups of older adults in South Africa. *International Journal of Environmental Research and Public Health*, 14(5). <https://doi.org/10.3390/ijerph14050502>
- Pengpid, S., & Karl, K. P. (2019). Sedentary behaviour and 12 sleep problem indicators among middle-aged and elderly adults in south africa. *International Journal of Environmental Research and Public Health*, 16(8). <https://doi.org/10.3390/ijerph16081422>
- Perold, A., & Muller, M. (2000). The composition of old age homes in South Africa in relation to the residents and nursing personnel. *Curationis*, 23(1), 87–94.



<https://doi.org/10.4102/curationis.v23i1.615>

- Pfttfor, J. M., Ross, F. T., & Solomon, L. (1978). Seasonal variation in serum 25-hydroxycholecalciferol concentrations in elderly South African patients with fractures of femoral neck. *British Medical Journal*, *1*(6116), 826–827. <https://doi.org/10.1136/bmj.1.6116.826>
- Phaswana-Mafuya, N., & Peltzer, K. (2018). Racial or ethnic health disparities among older adults in four population groups in South Africa. *Annals of Global Health*, *84*(1), 7–14. <https://doi.org/10.29024/aogh.13>
- Phaswana-Mafuya, N., Peltzer, K., Chirinda, W., Musekiwa, A., & Kose, Z. (2013). Sociodemographic predictors of multiple non-communicable disease risk factors among older adults in South Africa. *Global Health Action*, *6*(1). <https://doi.org/10.3402/gha.v6i0.20680>
- Phaswana-Mafuya, N., Peltzer, K., Chirinda, W., Musekiwa, A., Kose, Z., Hoosain, E., Davids, A., & Ramlagan, S. (2013). Self-reported prevalence of chronic non-communicable diseases and associated factors among older adults in south africa. *Global Health Action*, *6*(1). <https://doi.org/10.3402/gha.v6i0.20936>
- Phillips-Howard, P. A., Laserson, K. F., Amek, N., Beynon, C. M., Angell, S. Y., Khagayi, S., Byass, P., Hamel, M. J., Van Eijk, A. M., Zielinski-Gutierrez, E., Slutsker, L., De Cock, K. M., Vulule, J., & Odhiambo, F. O. (2014). Deaths ascribed to non-communicable diseases among rural kenyan adults are proportionately increasing: Evidence from a health and demographic surveillance system, 2003-2010. *PLoS ONE*, *9*(11). <https://doi.org/10.1371/journal.pone.0114010>
- Phukubye, P., & Oyedele, O. (2011). The incidence and structure of the fabella in a South African cadaver sample. *Clinical Anatomy*, *24*(1), 84–90. <https://doi.org/10.1002/ca.21049>
- Pienaar, E., Stearn, N., & Swanepoel, D. W. (2010). Self-reported outcomes of aural rehabilitation for adult hearing aid users in a South African context. *The South African Journal of Communication Disorders. Die Suid-Afrikaanse Tydskrif Vir Kommunikasiefwykings*, *57*. <https://doi.org/10.4102/sajcd.v57i1.44>
- Pieterse, S., Manandhar, M., & Ismail, S. (2002). The association between nutritional status and handgrip strength in older Rwandan refugees. *European Journal of Clinical Nutrition*, *56*(10), 933–939. <https://doi.org/10.1038/sj.ejcn.1601443>
- Pilleron, S., Clément, J. P., Ndamba-Bandzouzi, B., Mbelesso, P., Dartigues, J. F., Preux, P. M., Guerchet, M., Désormais, I., Lacroix, P., Aboyans, V., Desport, J. C., Jésus, P., Tchalla, A. E., Marin, B., & Lambert, J. C. (2015). Is dependent personality disorder associated with mild cognitive impairment

and dementia in Central Africa? A result from the EPIDEMCA programme. *International Psychogeriatrics*, 27(2), 279–288.

<https://doi.org/10.1017/S104161021400180X>

Pilleron, Sophie, Aboyans, V., Desormais, I., Lacroix, P., Preux, P. M., Guerchet, M., Mbelesso, P., Ndamba-Bandzouzi, B., Desport, J. C., Jésus, P., Tchalla, A. E., Marin, B., Clément, J. P., Lambert, J. C., & Dartigues, J. F. (2017). Prevalence, awareness, treatment, and control of hypertension in older people in Central Africa: the EPIDEMCA study. *Journal of the American Society of Hypertension*, 11(7), 449–460. <https://doi.org/10.1016/j.jash.2017.04.013>

Pilleron, Sophie, Guerchet, M., Ndamba-Bandzouzi, B., Mbelesso, P., Dartigues, J.-F., Preux, P.-M., & Clément, J.-P. (2015). Association between Stressful Life Events and Cognitive Disorders in Central Africa: Results from the EPIDEMCA Program. *Neuroepidemiology*, 44(2), 99–107. <https://doi.org/10.1159/000375462>

Pilleron, Sophie, Jésus, P., Desport, J. C., Mbelesso, P., Ndamba-Bandzouzi, B., Clément, J. P., Dartigues, J. F., Preux, P. M., & Guerchet, M. (2015). Association between mild cognitive impairment and dementia and undernutrition among elderly people in Central Africa: Some results from the EPIDEMCA (Epidemiology of Dementia in Central Africa) programme. *British Journal of Nutrition*, 114(2), 306–315. <https://doi.org/10.1017/S0007114515001749>

Pilleron, Sophie, Soerjomataram, I., Charvat, H., Chokunonga, E., Somdyala, N. I. M., Wabinga, H., Korir, A., Bray, F., Jemal, A., & Maxwell Parkin, D. (2019). Cancer incidence in older adults in selected regions of sub-Saharan Africa, 2008–2012. *International Journal of Cancer*, 144(8), 1824–1833. <https://doi.org/10.1002/ijc.31880>

Preux, P. M., & Desport, J. C. (2014). The nutritional status of older people with and without dementia living in an urban setting in Central Africa: The EDAC study. *Journal of Nutrition, Health and Aging*, 18(10), 868–875. <https://doi.org/10.1007/s12603-014-0483-7>

Prinsloo, F. R. (1991). *Health services - Needs of the elderly in two black urban areas of the Cape Peninsula*. South African Medical Journal. <https://pubmed.ncbi.nlm.nih.gov/2020892/>

Puckree, T., & Uthum, P. (2014). Effectiveness of a community based programme of physiotherapy on stability, balance and function of stroke patients. *South African Journal of Physiotherapy*, 70(1), 3–8. <https://go.gale.com/ps/i.do?p=HRCA&sw=w&issn=03796175&v=2.1&it=r&id=GALE%7CA455784087&sid=googleScholar&linkaccess=fulltext>

- Puckree, T., Chetty, T. P., Ramlakan, S., Simelane, T. V. S., & Lin, J. (1997). An evaluation of the functional status of the residents of a geriatric residential facility in South Africa. *Disability and Rehabilitation*, 19(12), 552–555. <https://doi.org/10.3109/09638289709166049>
- Puckree, Threethambal, Mkhize, M., Mgobhozi, Z., & Lin, J. (2002). African traditional healers: What health care professionals need to know. *International Journal of Rehabilitation Research*, 25(4), 247–251. <https://doi.org/10.1097/00004356-200212000-00001>
- Pupwe, G., Ngalamika, O., & Akudugu, J. (2020). Chemotherapy for elderly colorectal cancer patients at a tertiary hospital in South Africa. *The Pan African Medical Journal*, 37.
- Putnam, H. W. I., Jones, R., Rogathi, J., Gray, W. K., Swai, B., Dewhurst, M., Dewhurst, F., & Walker, R. W. (2018). Hypertension in a resource-limited setting: Is it associated with end organ damage in older adults in rural Tanzania? *The Journal of Clinical Hypertension*, 20(2), 217–224. <https://doi.org/10.1111/jch.13187>
- Raal, F. J., Blom, D. J., Naidoo, S., Bramlage, P., & Brudi, P. (2013). Prevalence of dyslipidaemia in statin-treated patients in South Africa: Results of the DYSlipidaemia International Study (DYSIS). *Cardiovascular Journal of Africa*, 24(8), 330–338. <https://doi.org/10.5830/CVJA-2013-071>
- Raal, F., Schamroth, C., Blom, D., Marx, J., Rajput, M., Haus, M., Hussain, R., Cassim, F., Nortjé, M., Vandenhoven, G., & Temmerman, A. M. (2011). CEPHEUS SA: A South African survey on the undertreatment of hypercholesterolaemia. In *Cardiovascular Journal of Africa* (Vol. 22, Issue 5, pp. 234–240). Clinics Cardive Publishing (Pty) Ltd. <https://doi.org/10.5830/CVJA-2011-044>
- Rabie, T., Klopper, H. C., & Watson, M. J. (2016). Relation of socio-economic status to the independent application of self-care in older persons of South Africa. *Health SA Gesondheid*, 21, 155–161. <https://doi.org/10.1016/j.hsag.2015.02.007>
- Rajak, S. N., Mohamed, M. D., & Pelosini, L. (2009). Further insight into west african crystalline maculopathy. *Archives of Ophthalmology*, 127(7), 863–868. <https://doi.org/10.1001/archophthalmol.2009.129>
- Ralston, M. (2018). The Role of Older Persons' Environment in Aging Well: Quality of Life, Illness, and Community Context in South Africa. *Gerontologist*, 58(1), 111–120. <https://doi.org/10.1093/geront/gnx091>
- Ralston, M., Schatz, E., Menken, J., Gómez-Olivé, F. X., & Tollman, S. (2015). Who benefits—or does not—from south africa's old age pension? Evidence from characteristics of rural pensioners and non-pensioners. *International Journal of Environmental Research and Public Health*, 13(1).

<https://doi.org/10.3390/ijerph13010085>

- Ralston, M., Schatz, E., Menken, J., Gómez-Olivé, F. X., & Tollman, S. (2019). Policy Shift: South Africa's Old Age Pensions' Influence on Perceived Quality of Life. *Journal of Aging and Social Policy*, *31*(2), 138–154. <https://doi.org/10.1080/08959420.2018.1542243>
- Ramjeeth, A., Butkow, N., Raal, F. J., & Maholwana-Mokgathe, M. (2008). The evaluation of low-density lipoprotein cholesterol goals achieved in patients with established cardiovascular disease and/or hyperlipidaemia receiving lipid-lowering therapy: the South African Not at Goal study (SA-NAG). *Cardiovascular Journal of Africa*, *19*(2), 88–94. <http://www.ncbi.nlm.nih.gov/pubmed/18516354>
- Ramlagan, S., Peltzer, K., & Phaswana-Mafuya, N. (2013). Social capital and health among older adults in South Africa. *BMC Geriatrics*, *13*(1), 100. <https://doi.org/10.1186/1471-2318-13-100>
- Ramlagan, S., Peltzer, K., & Phaswana-Mafuya, N. (2014). Hand grip strength and associated factors in non-institutionalised men and women 50 years and older in South Africa. *BMC Research Notes*, *7*(1), 8. <https://doi.org/10.1186/1756-0500-7-8>
- Ramlall, S., Chipps, J., Bhigjee, A. I., & Pillay, B. J. (2014). Sensitivity and specificity of neuropsychological tests for dementia and mild cognitive impairment in a sample of residential elderly in South Africa. *South African Journal of Psychiatry*, *20*(4), 153–159. <https://doi.org/10.7196/SAJP.558>
- Ramocho, L. M., Louw, Q. A., & Tshabalala, M. D. (2017). Quality of life and physical activity among older adults living in institutions compared to the community. *South African Journal of Physiotherapy*, *73*(1). <https://doi.org/10.4102/sajp.v73i1.342>
- Rand, D., & Eng, J. J. (2015). Predicting daily use of the affected upper extremity 1 year after stroke. *Journal of Stroke and Cerebrovascular Diseases*, *24*(2), 274–283. <https://doi.org/10.1016/j.jstrokecerebrovasdis.2014.07.039>
- Randall, S. (2016). The quality of demographic data on older Africans. *DEMOGRAPHIC RESEARCH*, *34*. <https://doi.org/10.4054/DemRes.2016.34.5>
- Randall, S., & Coast, E. (2016). The quality of demographic data on older Africans. *Demographic Research*, *34*(1), 143–174. <https://doi.org/10.4054/DemRes.2016.34.5>
- Rangel, E. L., Cooper, Z., Olufajo, O. A., Reznor, G., Lipsitz, S. R., Salim, A., Kwakye, G., Calahan, C., Sarhan, M., & Hanna, J. S. (2015). Mortality after emergency surgery continues to rise after discharge in the elderly. *Journal of Trauma and Acute Care Surgery*, *79*(3), 349–358.

<https://doi.org/10.1097/TA.0000000000000773>

- Ranjith, N., Myeni, N. N., Sartorius, B., & Mayise, C. (2017). Association between Hyperuricemia and Major Adverse Cardiac Events in Patients with Acute Myocardial Infarction. *Metabolic Syndrome and Related Disorders*, 15(1), 18–25. <https://doi.org/10.1089/met.2016.0032>
- Rayner, B., Ramesar, R., Steyn, K., Levitt, N., Lombard, C., & Charlton, K. (2012). G-protein-coupled receptor kinase 4 polymorphisms predict blood pressure response to dietary modification in Black patients with mild-to-moderate hypertension. *Journal of Human Hypertension*, 26(5), 334–339. <https://doi.org/10.1038/jhh.2011.33>
- Rayner, B., Ramesar, R., Steyn, K., Levitt, N., Lombard, C., & Charlton, K. (2012). G-protein-coupled receptor kinase 4 polymorphisms predict blood pressure response to dietary modification in Black patients with mild-to-moderate hypertension. *Journal of Human Hypertension*, 26(5), 334–339. <https://doi.org/10.1038/jhh.2011.33>
- Rayner, Brian, Blockman, M., Baines, D., & Trinder, Y. (2007). *A survey of hypertensive practices at two community health centres in Cape Town*. South African Medical Journal. <https://doi.org/10.7196/SAMJ.789>
- Reddy, J., Parker, J. R., Africa, C. W., & Stephen, L. X. G. (1985). Prevalence and severity of periodontitis in a high fluoride area in South Africa. *Community Dentistry and Oral Epidemiology*, 13(2), 108–112. <https://doi.org/10.1111/j.1600-0528.1985.tb01688.x>
- Reiger, S., Jardim, T. V., Abrahams-Gessel, S., Crowther, N. J., Wade, A., Gomez-Olive, F. X., Salomon, J., Tollman, S., & Gaziano, T. A. (2017). Awareness, treatment, and control of dyslipidemia in rural South Africa: The HAALSI (Health and Aging in Africa: A Longitudinal Study of an INDEPTH Community in South Africa) study. *PLoS ONE*, 12(10). <https://doi.org/10.1371/journal.pone.0187347>
- Resnikoff, S. (1988). *Bietti's keratopathy. A study of risk factors in Central Africa*. *Journal Francais d'Ophtalmologie*. <https://pubmed.ncbi.nlm.nih.gov/3266940/>
- Rhoda, A., Cunningham, N., Azaria, S., & Urimubenshi, G. (2015). Provision of inpatient rehabilitation and challenges experienced with participation post discharge: Quantitative and qualitative inquiry of African stroke patients. In *BMC Health Services Research* (Vol. 15, Issue 1). BioMed Central Ltd. <https://doi.org/10.1186/s12913-015-1057-z>
- Richards, E., Zalwango, F., Seeley, J., Scholten, F., & Theobald, S. (2013). Neglected older women and men: Exploring age and gender as structural drivers

- of HIV among people aged over 60 in Uganda. *African Journal of AIDS Research*, 12(2), 71–78. <https://doi.org/10.2989/16085906.2013.831361>
- Rishworth, A., Elliott, S. J., & Kangmennaang, J. (2020). Getting old well in sub saharan Africa: Exploring the social and structural drivers of subjective wellbeing among elderly men and women in Uganda. *International journal of environmental research and public health*, 17(7), 2347.
- Robb, L., Walsh, C. M., Nel, M., Nel, A., Odendaal, H., & van Aardt, R. (2017). Malnutrition in the elderly residing in long-term care facilities: a cross sectional survey using the Mini Nutritional Assessment (MNA®) screening tool. *South African Journal of Clinical Nutrition*, 30(2), 34–40. <https://doi.org/10.1080/16070658.2016.1248062>
- Rodriguez, H., Brathwaite, D., & Dorsey, S. (2002). *Depression and social support in the elderly population: a study of rural South African elders*. The ABNF Journal : Official Journal of the Association of Black Nursing Faculty in Higher Education, Inc. <https://pubmed.ncbi.nlm.nih.gov/12017113/>
- Rohr, J. K., Xavier Gómez-Olivé, F., Rosenberg, M., Manne-Goehler, J., Geldsetzer, P., Wagner, R. G., Houle, B., Salomon, J. A., Kahn, K., Tollman, S., Berkman, L., & Bärnighausen, T. (2017). Performance of self-reported HIV status in determining true HIV status among older adults in rural South Africa: A validation study. *Journal of the International AIDS Society*, 20(1). <https://doi.org/10.7448/IAS.20.1.21691>
- Roos, V., & Klopper, H. (2010). Older Persons' Experiences of Loneliness: A South African Perspective. *Journal of Psychology in Africa*, 20(2), 281–289. <https://doi.org/10.1080/14330237.2010.10820377>
- Roos, V., & Malan, L. (2012). The role of context and the interpersonal experience of loneliness among older people in a residential care facility. *Global Health Action*, 5(1), 18861. <https://doi.org/10.3402/gha.v5i0.18861>
- Roos, V., & Wheeler, A. (2016). Older people's experiences of giving and receiving empathy in relation to middle adolescents in rural South Africa. *South African Journal of Psychology*, 46(4), 517–529. <https://doi.org/10.1177/0081246316638563>
- Roos, V., Kolobe, P. S., & Keating, N. (2014). (Re)creating community: Experiences of Older Women Forcibly Relocated During Apartheid. *Journal of Community & Applied Social Psychology*, 24(1), 12–25. <https://doi.org/10.1002/casp.2177>
- Roos, V., Silvestre, S., & De Jager, T. (2017). Intergenerational Care Perceptions of Older Women and Middle Adolescents in a Resource-Constrained Community in South Africa. *Journal of Gerontological Social Work*, 60(2), 104–119. <https://doi.org/10.1080/01634372.2016.1268231>
- Rosenberg, M., Gómez-Olivé, F. X., Wagner, R. G., Rohr, J., Payne, C. F., Berkman, L., ... & Kobayashi, L. C. (2020). The relationships between cognitive

- function, literacy and HIV status knowledge among older adults in rural South Africa. *Journal of the International AIDS Society*, 23(3), e25457.
- Rossouw, L., & Smith, A. (2017). A comparable yardstick: Adjusting for education bias in South African health system responsiveness ratings. *Health Policy and Planning*, 32(suppl\_3), iii67–iii74. <https://doi.org/10.1093/heapol/czx107>
- Rotchford, A. P., & Johnson, G. J. (2000). *Rapid assessment of cataract surgical coverage in rural Zululand*. South African Medical Journal. <https://pubmed.ncbi.nlm.nih.gov/11081113/>
- Rotchford, A. P., Rotchford, K. M., Mthethwa, L. P., & Johnson, G. J. (2002). Reasons for poor cataract surgery uptake - A qualitative study in rural south africa. *Tropical Medicine and International Health*, 7(3), 288–292. <https://doi.org/10.1046/j.1365-3156.2002.00850.x>
- Rotchford, Alan P., & Johnson, G. J. (2002). Glaucoma in Zulus: A population-based cross-sectional survey in a rural district in South Africa. *Archives of Ophthalmology*, 120(4), 471–478. <https://doi.org/10.1001/archophth.120.4.471>
- Rotchford, Alan P., Kirwan, J. F., Johnson, G. J., & Roux, P. (2003). Exfoliation syndrome in black South Africans. *Archives of Ophthalmology*, 121(6), 863–870. <https://doi.org/10.1001/archophth.121.6.863>
- Rotchford, Alan P., Kirwan, J. F., Muller, M. A., Johnson, G. J., & Roux, P. (2003). Temba glaucoma study: A population-based cross-sectional survey in urban South Africa. *Ophthalmology*, 110(2), 376–382. [https://doi.org/10.1016/S0161-6420\(02\)01568-3](https://doi.org/10.1016/S0161-6420(02)01568-3)
- Rutagumirwa, S. K., & Bailey, A. (2019). “I Have to Listen to This Old Body”: Femininity and the Aging Body. *Gerontologist*, 59(2), 368–377. <https://doi.org/10.1093/geront/gnx161>
- Saeed, B. I. I., Yawson, A. E., Nguah, S., Agyei-Baffour, P., Emmanuel, N., & Ayesu, E. (2016). Effect of socio-economic factors in utilization of different healthcare services among older adult men and women in Ghana. *BMC Health Services Research*, 16(1), 390. <https://doi.org/10.1186/s12913-016-1661-6>
- Sanuade, O. A., Doodoo, F. N.-A., Koram, K., & de-Graft Aikins, A. (2019). Prevalence and correlates of stroke among older adults in Ghana: Evidence from the Study on Global AGEing and adult health (SAGE). *PLOS ONE*, 14(3), e0212623. <https://doi.org/10.1371/journal.pone.0212623>
- Sanya, E. O., Abiodun, A. A., Kolo, P. O., Olanrewaju, T., & Adekeye, K. (2011). Profile and causes of mortality among elderly patients seen in a tertiary care hospital in Nigeria. *Annals of African Medicine*, 10(4), 278–283. <https://doi.org/10.4103/1596-3519.87043>

- Sarfo, F. S., Akassi, J., Agyei, M., Kontoh, S., & Ovbiagele, B. (2020). Risk Factor Control in Stroke Survivors with Diagnosed and Undiagnosed Diabetes: A Ghanaian Registry Analysis. *Journal of Stroke and Cerebrovascular Diseases*, 29(12), 105304.
- Sarkodie, B. D., Botwe, B. O., & Brakohiapa, E. K. K. (2020). Percutaneous transhepatic biliary stent placement in the palliative management of malignant obstructive jaundice: initial experience in a tertiary center in Ghana. *The Pan African Medical Journal*, 37.
- Schatz, E. J. (2007). "Taking care of my own blood": Older women's relationships to their households in rural South Africa. *Scandinavian Journal of Public Health*, 35(SUPPL. 69), 147–154. <https://doi.org/10.1080/14034950701355676>
- Schatz, E. J. (2009). Reframing vulnerability: Mozambican refugees' access to state-funded pensions in rural South Africa. *Journal of Cross-Cultural Gerontology*, 24(3), 241–258. <https://doi.org/10.1007/s10823-008-9089-z>
- Schatz, E., & Gilbert, L. (2014). "My Legs Affect Me a Lot... I Can No Longer Walk to the Forest to Fetch Firewood": Challenges Related to Health and the Performance of Daily Tasks for Older Women in a High HIV Context. *Health Care for Women International*, 35(7–9), 771–788. <https://doi.org/10.1080/07399332.2014.900064>
- Schatz, E., & Knight, L. (2018). "I was referred from the other side": Gender and HIV testing among older South Africans living with HIV. *PLOS ONE*, 13(4), e0196158. <https://doi.org/10.1371/journal.pone.0196158>
- Schatz, E., Gómez-Olivé, X., Ralston, M., Menken, J., & Tollman, S. (2012). The impact of pensions on health and wellbeing in rural South Africa: Does gender matter? *Social Science and Medicine*, 75(10), 1864–1873. <https://doi.org/10.1016/j.socscimed.2012.07.004>
- Schatz, E., Madhavan, S., Collinson, M., Gómez-Olivé, F. X., & Ralston, M. (2015). Dependent or Productive? A New Approach to Understanding the Social Positioning of Older South Africans Through Living Arrangements. *Research on Aging*, 37(6), 581–605. <https://doi.org/10.1177/0164027514545976>
- Schatz, E., Ralston, M., Madhavan, S., Collinson, M. A., & Gómez-Olivé, F. X. (2018). Living arrangements, disability and gender of older adults among rural South Africa. *Journals of Gerontology - Series B Psychological Sciences and Social Sciences*, 73(6), 1112–1122. <https://doi.org/10.1093/geronb/gbx081>
- Schatz, E., Seeley, J., Negin, J., Weiss, H. A., Tumwekwase, G., Kabunga, E., Nalubega, P., & Mugisha, J. (2019). "for us here, we remind ourselves": Strategies and barriers to ART access and adherence among older Ugandans. *BMC Public Health*, 19(1), 131. <https://doi.org/10.1186/s12889-019-6463-4>



- Schmidlin, E. J., Steyn, M., Houlton, T. M. R., & Briers, N. (2018). Facial ageing in South African adult males. *Forensic Science International*, 289, 277–286. <https://doi.org/10.1016/j.forsciint.2018.05.006>
- Schnaid, E., MacPhail, A. P., & Sweet, M. B. E. (2000). Fractured neck of femur in black patients. *Journal of Bone and Joint Surgery - Series B*, 82(6), 872–875. <https://doi.org/10.1302/0301-620X.82B6.10589>
- Schoeman, B. J. (1996). [Squamous cell carcinoma in neuropathic plantar ulcers in leprosy: another example of Marjolin's ulcer]. *S Afr Med J*. <https://pubmed.ncbi.nlm.nih.gov/8966648/>
- Scholten, F., Mugisha, J., Seeley, J., Kinyanda, E., Nakubukwa, S., Kowal, P., Naidoo, N., Boerma, T., Chatterji, S., & Grosskurth, H. (2011). Health and functional status among older people with HIV/AIDS in Uganda. *BMC Public Health*, 11(1), 886. <https://doi.org/10.1186/1471-2458-11-886>
- Segal, I., Reinach, S. G., & De Beer, M. (1988). Factors associated with oesophageal cancer in soweto, south africa. *British Journal of Cancer*, 58(5), 681–686. <https://doi.org/10.1038/bjc.1988.286>
- Segal, Isidor, & Walker, A. R. P. (1982). Diverticular Disease in Urban Africans in South Africa. *Digestion*, 24(1), 42–46. <https://doi.org/10.1159/000198773>
- Segal, Isidor, Solomon, A., Tim, L. O., Rabin, M., & Walker, A. R. P. (1980). Hiatus hernia in Johannesburg blacks. *Undefined*.
- Semeere, A. S., Lwanga, I., Sempa, J., Parikh, S., Nakasujja, N., Cumming, R., Kambugu, A., & Mayanja-Kizza, H. (2014). Mortality and immunological recovery among older adults on antiretroviral therapy at a Large Urban HIV clinic in Kampala, Uganda. *Journal of Acquired Immune Deficiency Syndromes*, 67(4), 382–389. <https://doi.org/10.1097/QAI.0000000000000330>
- Simo, N., Kuate-Tegueu, C., Ngankou-Tchankeu, S., Doumbe, J., Maiga, Y., Cesari, M., ... & Tabue-Teguo, M. (2020). Correlates of diabetic polyneuropathy of the elderly in Sub-Saharan Africa. *PloS one*, 15(10), e0240602.
- Sidloyi, S. S., & Bomela, N. J. (2016). Survival strategies of elderly women in Ngangelizwe Township, Mthatha, South Africa: Livelihoods, social networks and income. *Archives of Gerontology and Geriatrics*, 62, 43–52. <https://doi.org/10.1016/j.archger.2015.09.006>
- Silbert, M. V. (1977). *Medical and psychosocial problems of the aged*. South African Medical Journal. <https://pubmed.ncbi.nlm.nih.gov/857322/>
- Singo, V. J., Lebesse, R. T., Maluleke, T. X., & Nemathaga, L. H. (2015). The views of the elderly on the impact that HIV and AIDS has on their lives in the

- Thulamela Municipality, Vhembe District, Limpopo province. *Curationis*, 38(1). <https://doi.org/10.4102/curationis.v38i1.1166>
- Sissolak, G., Wood, L., Smith, L., Chan, J. (Wing C., Armitage, J., & Jacobs, P. (2013). Tissue microarray in a subset of South African patients with DLBCL. *Transfusion and Apheresis Science*, 49(2), 120–132. <https://doi.org/10.1016/j.transci.2013.07.013>
- Skidmore, E. R., Whyte, E. M., Butters, M. A., Terhorst, L., & Reynolds, C. F. (2015). Strategy Training During Inpatient Rehabilitation May Prevent Apathy Symptoms After Acute Stroke. *PM and R*, 7(6), 562–570. <https://doi.org/10.1016/j.pmrj.2014.12.010>
- Skovdal, M., Campbell, C., Madanhire, C., Nyamukapa, C., & Gregson, S. (2011). Challenges faced by elderly guardians in sustaining the adherence to antiretroviral therapy in HIV-infected children in Zimbabwe. In *AIDS Care - Psychological and Socio-Medical Aspects of AIDS/HIV* (Vol. 23, Issue 8, pp. 957–964). AIDS Care. <https://doi.org/10.1080/09540121.2010.542298>
- Sliwa, K., Carrington, M. J., Klug, E., Opie, L., Lee, G., Ball, J., & Stewart, S. (2010). Predisposing factors and incidence of newly diagnosed atrial fibrillation in an urban African community: Insights from the Heart of Soweto Study. *Heart*, 96(23), 1878–1882. <https://doi.org/10.1136/hrt.2010.206938>
- Smith, A. J., Hall, D. R., & Grové, D. (2005). Current patient perceptions on the menopause: A South African perspective. In *Climacteric* (Vol. 8, Issue 4, pp. 327–332). Taylor & Francis. <https://doi.org/10.1080/13697130500196817>
- Sobnach, S., Khosa, S. A., Pather, S., Longhurst, S., Kahn, D., & Raubenheimer, P. J. (2009). First case report of pharyngeal cysticercosis. *Transactions of the Royal Society of Tropical Medicine and Hygiene*, 103(2), 206–208. <https://doi.org/10.1016/j.trstmh.2008.08.017>
- Solomon, A., Christian, B. F., Woodiwiss, A., Norton, G., & Desein, P. (2011). Burden of depressive symptoms in South African public healthcare patients with established rheumatoid arthritis: a case-control study. *Undefined*.
- Solomon, Ahmed, Christian, B. F., Desein, P. H., & Stanwix, A. E. (2005). The need for tighter rheumatoid arthritis control in a South African public health care center. *Seminars in Arthritis and Rheumatism*, 35(2), 122–131. <https://doi.org/10.1016/j.semarthrit.2005.05.005>
- Solomon, L., Schnitzler, C. M., & Browett, J. P. (1982). Osteoarthritis of the hip: The patient behind the disease. *Annals of the Rheumatic Diseases*, 41(2), 118–125. <https://doi.org/10.1136/ard.41.2.118>
- Solomons, K. (1984). *Malignant mesothelioma - clinical epidemiological features. A report of 80 cases*. South African Medical Journal.

<http://www.embase.com/search/results?subaction=viewrecord&from=export&id=L14014232>

- Somdyala, N. I., Bradshaw, D., Gelderblom, W. C., & Parkin, D. M. (2010). Cancer incidence in a rural population of South Africa, 1998-2002. *International Journal of Cancer*, 127(10), 2420–2429. <https://doi.org/10.1002/ijc.25246>
- Ssengonzi, R. (2007). The Plight of Older Persons as Caregivers to People Infected/Affected by HIV/AIDS: Evidence from Uganda. *Journal of Cross-Cultural Gerontology*, 22(4), 339–353. <https://doi.org/10.1007/s10823-007-9043-5>
- Ssonko, M., Stanaway, F., Mayanja, H. K., Namuleme, T., Cumming, R., Kyalimpa, J. L., Karamagi, Y., Mukasa, B., & Naganathan, V. (2018). Polypharmacy among HIV positive older adults on anti-retroviral therapy attending an urban clinic in Uganda. *BMC Geriatrics*, 18(1), 125. <https://doi.org/10.1186/s12877-018-0817-0>
- Surka, J., & Hussain, S. (2001). *Outcome of high-volume cataract surgery at an academic hospital*. South African Medical Journal. <https://pubmed.ncbi.nlm.nih.gov/11680328/>
- Swart, L., Dreyer, W., van Zyl, P., & Blignaut, R. (2014). Early Loading of Mandibular Implants Placed Immediately After Extraction: A 10-year Prospective Study of Eight Patients. *The International Journal of Oral & Maxillofacial Implants*, 29(6), 1388–1396. <https://doi.org/10.11607/jomi.3670>
- Tannor, E. K., Archer, E., Kapembwa, K., Van Schalkwyk, S. C., & Davids, M. R. (2017). Quality of life in patients on chronic dialysis in South Africa: A comparative mixed methods study. *BMC Nephrology*, 18(1). <https://doi.org/10.1186/s12882-016-0425-1>
- Tanyi, P. L., Pelsler, A., & Okeibunor, J. (2018). Hiv/aids and older adults in cameroon: Emerging issues and implications for caregiving and policy-making. *Sahara J*, 15(1), 7–19. <https://doi.org/10.1080/17290376.2018.1433059>
- Tarekegne, F. E., Padyab, M., Schröders, J., & Williams, J. S. (2018). Sociodemographic and behavioral characteristics associated with selfreported diagnosed diabetes mellitus in adults aged 50+ years in Ghana and South Africa: Results from the WHOSAGE wave 1. *BMJ Open Diabetes Research and Care*, 6(1), 449. <https://doi.org/10.1136/bmjdr-2017-000449>
- Till, H., & Till, G. (1999). *Experience in a Hospital-Based Clinic as Part of Chiropractic Undergraduate Training*. The Journal of Chiropractic Education. [https://www.researchgate.net/publication/230601837\\_Experience\\_in\\_a\\_hospital-based\\_clinic\\_as\\_part\\_of\\_chiropractic\\_undergraduate\\_training](https://www.researchgate.net/publication/230601837_Experience_in_a_hospital-based_clinic_as_part_of_chiropractic_undergraduate_training)

- Tipping, B., Kalula, S., & Badri, M. (2006). The burden and risk factors for adverse drug events in older patients - A prospective cross-sectional study. *South African Medical Journal*, 96(12 I), 1255–1259. <https://doi.org/10.7196/SAMJ.1359>
- Togonu-Bickersteth, F. (1986). Age identification among Yoruba aged. *Journals of Gerontology*, 41(1), 110–113. <https://doi.org/10.1093/geronj/41.1.110>
- Tolani, M. A., Suleiman, A., Awaisu, M., Abdulaziz, M. M., Lawal, A. T., & Bello, A. (2020). Acute urinary tract infection in patients with underlying benign prostatic hyperplasia and prostate cancer. *The Pan African Medical Journal*, 36.
- Tomás, J. M., Gutiérrez, M., Sancho, P., & Galiana, L. (2012). Predicting perceived health in Angolan elderly: The moderator effect of being oldest old. *Archives of Gerontology and Geriatrics*, 55(3), 605–610. <https://doi.org/10.1016/j.archger.2012.06.010>
- Tomita, A., & Burns, J. K. (2013). Depression, disability and functional status among community-dwelling older adults in South Africa: Evidence from the first South African National Income Dynamics Study. *International Journal of Geriatric Psychiatry*, 28(12), 1270–1279. <https://doi.org/10.1002/gps.3954>
- Torgersen, J., Bellamy, S. L., Ratshaa, B., Han, X., Mosepele, M., Zuppa, A. F., Vujkovic, M., Steenhoff, A. P., Bisson, G. P., & Gross, R. (2019). Impact of Efavirenz Metabolism on Loss to Care in Older HIV+ Africans. *European Journal of Drug Metabolism and Pharmacokinetics*, 44(2), 179–187. <https://doi.org/10.1007/s13318-018-0507-5>
- Toure, K., Coume, M., Ndiaye, M., Zunzunegui, M. V., Bacher, Y., Diop, A. G., & Ndiaye, M. M. (2012). Risk Factors for Dementia in a Senegalese Elderly Population Aged 65 Years and Over. *Dementia and Geriatric Cognitive Disorders Extra*, 2(1), 160–168. <https://doi.org/10.1159/000332022>
- Udjo, E. O. (2006). Demographic impact of HIV/AIDS on the young and elderly populations in South Africa. *Journal of Intergenerational Relationships*, 4(2), 23–41. [https://doi.org/10.1300/J194v04n02\\_03](https://doi.org/10.1300/J194v04n02_03)
- Udvardy, M., & Cattell, M. (1992). Gender, aging and power in sub-Saharan Africa: Challenges and puzzles. *Journal of Cross-Cultural Gerontology*, 7(4), 275–288. <https://doi.org/10.1007/BF01848695>
- Uwakwe, R., Ibeh, C. C., Modebe, A. I., Bo, E., Ezeama, N., Njelita, I., Ferri, C. P., & Prince, M. J. (2009). The epidemiology of dependence in older people in Nigeria: Prevalence, determinants, informal care, and health service utilization. A 10/66 Dementia Research Group cross-sectional survey. *Journal of the American Geriatrics Society*, 57(9), 1620–1627. <https://doi.org/10.1111/j.1532-5415.2009.02397.x>
- Uys, L. R., & Hunt, B. N. (1990). Standards for the nursing care of the frail aged. *Curationis*, 13(1–2), 19–20. <https://doi.org/10.4102/curationis.v13i1/2.277>

- Van Biljon, L., Nel, P., & Roos, V. (2015). A partial validation of the WHOQOL-OLD in a sample of older people in South Africa. *Global Health Action*, 8(1), 28209. <https://doi.org/10.3402/gha.v8.28209>
- van Biljon, L., Roos, V., & Botha, K. (2015). A Conceptual Model of Quality of Life for Older People in Residential Care Facilities in South Africa. *Applied Research in Quality of Life*, 10(3), 435–457. <https://doi.org/10.1007/s11482-014-9322-6>
- Van Der Geest, S. (2004). “They don’t come to listen”: the experience of loneliness among older people in Kwahu, Ghana. *Journal of Cross-Cultural Gerontology*, 19(2), 77–96. <https://doi.org/10.1023/B:JCCG.0000027846.67305.f0>
- van der Pas, S., Ramklass, S., O’Leary, B., Anderson, S., Keating, N., & Cassim, B. (2015). Features of home and neighbourhood and the liveability of older South Africans. *European Journal of Ageing*, 12(3), 215–227. <https://doi.org/10.1007/s10433-015-0343-2>
- Van Der Wielen, N., Channon, A. A., & Falkingham, J. (2018). Universal health coverage in the context of population ageing: What determines health insurance enrolment in rural Ghana? *BMC Public Health*, 18(1), 657. <https://doi.org/10.1186/s12889-018-5534-2>
- Van Dongen, E. (2003). “Die lewe vat ek net soos ek dit kry.” Life stories and remembrance of older coloured people on farms in the western cape province. *Journal of Cross-Cultural Gerontology*, 18(4), 303–335. <https://doi.org/10.1023/B:JCCG.0000004900.01896.ac>
- van Dongen, E. (2005). Remembering in times of misery: Can older people in South Africa “get through”? *Ageing and Society*, 25(4), 525–541. <https://doi.org/10.1017/S0144686X05003806>
- van Rensburg, A. J., Kotze, I., Lubbe, M. S., & Cockeran, M. (2017). An elderly, urban population: Their experiences and expectations of pharmaceutical services in community pharmacies. *Health SA Gesondheid*, 22, 241–251. <https://doi.org/10.1016/j.hsag.2016.12.002>
- Van Sjaak Geest, D. E. R. (2002). “I want to go!” How older people in Ghana look forward to death. *Ageing and Society*, 22(1), 7–28. <https://doi.org/10.1017/S0144686X02008541>
- Van Staden, A. M., & Weich, D. J. V. (2007). Profile of the geriatric patient hospitalised at Universitas Hospital, South Africa. *South African Family Practice*, 49(2), 14. <https://doi.org/10.1080/20786204.2007.10873508>
- van Vuuren, A., Rheeder, P., & Hak, E. (2009). Effectiveness of influenza vaccination in the elderly in South Africa. *Epidemiology and Infection*, 137(7), 994–

1002. <https://doi.org/10.1017/S0950268808001386>

Vlantis, A. C., Gregor, R. T., Elliot, H., & Oudes, M. (2003). Conversion from a non-indwelling to a Provox®2 indwelling voice prosthesis for speech rehabilitation: Comparison of voice quality and patient preference. *Journal of Laryngology and Otology*, 117(10), 815–820.

<https://doi.org/10.1258/002221503770716278>

Von Klemperer, A., Bateman, K., Owen, J., & Bryer, A. (2014). Thrombolysis risk prediction: Applying the SITS-SICH and SEDAN scores in South African patients. *Cardiovascular Journal of Africa*, 25(5), 224–227. <https://doi.org/10.5830/CVJA-2014-043>

Vorobiof, D. A., Rapoport, B. L., Chasen, M. R., Slabber, C., McMichael, G., Eek, R., & Mohammed, C. (2004). First line therapy with paclitaxel (Taxol®) and pegylated liposomal doxorubicin (Caelyx®) in patients with metastatic breast cancer: A multicentre phase II study. *Breast*, 13(3), 219–226.

<https://doi.org/10.1016/j.breast.2004.01.006>

Vorster, M., Modiselle, M., Ebenhan, T., Wagener, C., Sello, T., Zeevaart, J. R., Moshokwa, E., & Sathekge, M. M. (2015). *Fluorine-18-Fluoroethylcholine PET/CT in the detection of prostate cancer: A South African experience*. Hellenic Journal of Nuclear Medicine.

<https://pubmed.ncbi.nlm.nih.gov/25840573/>

Wachira, B. W., & Tyler, M. D. (2015). Characterization of in-hospital cardiac arrest in adult patients at a tertiary hospital in Kenya. *African Journal of Emergency Medicine*, 5(2), 70–74. <https://doi.org/10.1016/j.afjem.2014.10.006>

Walker, A. R., Walker, B. F., Funani, L. S., & Segal, I. (1989). *Risk factors and survival from colorectal cancer in black patients in Soweto, South Africa*. Tropical Gastroenterology : Official Journal of the Digestive Diseases Foundation. <https://pubmed.ncbi.nlm.nih.gov/2626780/>

Walker, A. R., Walker, B. F., Manetsi, B., Molefe, O., & Walker, J. A. (1991). Serum Albumin Levels in Elderly Rural Africans. *International Journal for Vitamin and Nutrition Research*, 61(4), 339–345. [https://jglobal.jst.go.jp/en/detail?JGLOBAL\\_ID=200902081288495701](https://jglobal.jst.go.jp/en/detail?JGLOBAL_ID=200902081288495701)

Walker, A. R., Walker, B. F., Manetsi, B., Tsotetsi, N. G., & Walker, A. J. (1990). Obesity in black women in Soweto, South Africa: minimal effects on hypertension, hyperlipidaemia and hyperglycaemia. *Journal of the Royal Society of Health*, 110(3), 101–103.

<https://doi.org/10.1177/146642409011000311>

Walker, A. R.P., & Walker, B. F. (2005). Lung cancer in Africans in a South African city population in transition. *European Journal of Cancer Prevention*,

14(2), 187–189. <https://doi.org/10.1097/00008469-200504000-00017>

Walker, A. R.P., Walker, B. F., Isaacson, C., Doodha, M. I., & Segal, I. (1986). Survival of black men with prostatic cancer in Soweto, Johannesburg, South Africa. *Journal of Urology*, 135(1), 58–59. [https://doi.org/10.1016/S0022-5347\(17\)45516-9](https://doi.org/10.1016/S0022-5347(17)45516-9)

Walker, A. R.P., Walker, B. F., Tsoetsi, N. G., Sebitso, C., Siwedi, D., & Walker, A. J. (1992). Case-control study of prostate cancer in black patients in soweto, south africa. *British Journal of Cancer*, 65(3), 438–441. <https://doi.org/10.1038/bjc.1992.89>

Walker, Alexander R. P., Segal, I., Posner, R. D., Shein, H. M., Tsoetsi, N. G., & Walker, A. J. (1989). Prevalence of gallstones in elderly black women in Soweto, Johannesburg, as assessed by ultrasound. *Undefined*.

Wallrauch, C., Bärnighausen, T., & Newell, M. L. (2010). *HIV prevalence and incidence in people 50 years and older in rural South Africa*. South African Medical Journal. <https://doi.org/10.7196/samj.4181>

Wandera, Stephen O., Ntozi, J., & Kwagala, B. (2014). Prevalence and correlates of disability among older Ugandans: evidence from the Uganda National Household Survey. *Global Health Action*, 7(1), 25686. <https://doi.org/10.3402/gha.v7.25686>

Wandera, Stephen Ojiambo, Golaz, V., Kwagala, B., & Ntozi, J. (2015). Factors associated with self-reported ill health among older Ugandans: A cross sectional study. *Archives of Gerontology and Geriatrics*, 61(2), 231–239. <https://doi.org/10.1016/j.archger.2015.05.006>

Wandera, Stephen Ojiambo, Kwagala, B., & Ntozi, J. (2015). Prevalence and risk factors for self-reported non-communicable diseases among older Ugandans: a cross-sectional study. *Global Health Action*, 8(1), 27923. <https://doi.org/10.3402/gha.v8.27923>

Ware, L. J., Charlton, K., Schutte, A. E., Cockeran, M., Naidoo, N., & Kowal, P. (2017). Associations between dietary salt, potassium and blood pressure in South African adults: WHO SAGE Wave 2 Salt & Tobacco. *Nutrition, Metabolism and Cardiovascular Diseases*, 27(9), 784–791. <https://doi.org/10.1016/j.numecd.2017.06.017>

Wasserman, L. J., Apffelstaedt, J. P., & de V. Odendaal, J. (2007). Conservative management of breast cancer in the elderly in a developing country. *World Journal of Surgical Oncology*, 5(1), 108. <https://doi.org/10.1186/1477-7819-5-108>

Wasserman, S., & Bryer, A. (2012). Early outcomes of thrombolysis for acute ischaemic stroke in a South African tertiary care centre. *South African Medical*

*Journal*, 102(6), 541–544. <https://doi.org/10.7196/samj.5403>

Wasserman, S., de Villiers, L., & Bryer, A. (2009). *Community-based care of stroke patients in a rural African setting*. *South African Medical Journal*. <https://doi.org/10.7196/SAMJ.3284>

Waterhouse, P., Van Der Wielen, N., Banda, P. C., & Channon, A. A. (2017). The impact of multi-morbidity on disability among older adults in South Africa: Do hypertension and socio-demographic characteristics matter? *International Journal for Equity in Health*, 16(1). <https://doi.org/10.1186/s12939-017-0537-7>

Watkins, D., Brouwer, E., & Nugent, R. (2014). PT321 Economic consequences of cardiovascular disease in South African households: an analysis of the WHO Study on Global Aging (SAGE). *Global Heart*, 9(1), e229. <https://doi.org/10.1016/j.gheart.2014.03.2053>

Watson, M. J., Klopper, H. C., & Kruger, A. (2013). Community-based collaboration in support of older persons. *Journal of Psychology in Africa*, 23(3), 515–518. <https://doi.org/10.1080/14330237.2013.10820661>

Webb, E. M., Rheeder, P., & Van Zyl, D. G. (2015). Diabetes care and complications in primary care in the Tshwane district of South Africa. *Primary Care Diabetes*, 9(2), 147–154. <https://doi.org/10.1016/j.pcd.2014.05.002>

Wentink, M. Q., Räkera, M., Stupart, D. A., Algar, U., Ramesar, R., & Goldberg, R. A. (2010). *Incidence and histological features of colorectal cancer in the Northern Cape province, South Africa*. *South African Journal of Surgery*. <https://doi.org/10.7196/sajs.672>

Werfalli, M., Kassanje, R., Kalula, S., Kowal, P., Phaswana-Mafuya, N., & Levitt, N. S. (2018). Diabetes in South African older adults: prevalence and impact on quality of life and functional disability—as assessed using SAGE Wave 1 data. *Global Health Action*, 11(1). <https://doi.org/10.1080/16549716.2018.1449924>

Wessels, P. F., & Riback, W. J. (2012). *DVT prophylaxis in relation to patient risk profiling - the TUNE-IN study*. *South African Medical Journal*. <https://www.ajol.info/index.php/samj/article/view/74596>

Westaway, M. S., Rheeder, P., & Gumede, T. (2001). The effect of type 2 diabetes mellitus on health-related quality of life (HRQOL). *Curationis*, 24(1), 74–78. <https://doi.org/10.4102/curationis.v24i1.805>



- Westaway, Margaret S. (2010a). *Effects of ageing, chronic disease and co-morbidity on the health and well-being of older residents of Greater Tshwane*. South African Medical Journal. <https://doi.org/10.7196/SAMJ.3473>
- Westaway, Margaret S. (2010b). The impact of chronic diseases on the health and well-being of South Africans in early and later old age. *Archives of Gerontology and Geriatrics*, 50(2), 213–221. <https://doi.org/10.1016/j.archger.2009.03.012>
- Westaway, Margaret S., Jordaan, E. R., & Tsai, J. (2015). Investigating the Psychometric Properties of the Rosenberg Self-Esteem Scale for South African Residents of Greater Pretoria. *Evaluation and the Health Professions*, 38(2), 181–199. <https://doi.org/10.1177/0163278713504214>
- Westaway, Margaret S., Olorunju, S. A. S., & Rai, L.-C. J. (2007). Which Personal Quality of Life Domains Affect the Happiness of Older South Africans? In *Quality of Life Research* (Vol. 16, pp. 1425–1438). Springer. <https://doi.org/10.2307/40212619>
- Whigham, B. T., Williams, S. E. I., Liu, Y., Rautenbach, R. M., Carmichael, T. R., Wheeler, J., Ziskind, A., Qin, X., Schmidt, S., Ramsay, M., Hauser, M. A., & Allingham, R. R. (2011). Myocilin mutations in black South Africans with POAG. *Molecular Vision*, 17, 1064–1069. <http://www.ncbi.nlm.nih.gov/pubmed/21552496>
- Whitelaw, D. A., Meyer, C. J., Bawa, S., & Jennings, K. (1994). *Post-discharge follow-up of stroke patients at Groote Schuur Hospital - A prospective study*. South African Medical Journal. <https://www.ajol.info/index.php/samj/article/view/149020>
- Whitelaw, David A., Rayner, B. L., & Willcox, P. A. (1992). Community-Acquired Bacteremia in the Elderly: A Prospective Study of 121 Cases. *Journal of the American Geriatrics Society*, 40(10), 996–1000. <https://doi.org/10.1111/j.1532-5415.1992.tb04475.x>
- Whittaker, S., Prinsloo r., F., Wicht, C. L., & Janse van Rensburg, M. P. (1991). *Frail aged persons residing in South African homes for the aged who require hospitalisation. Part I. Urban areas*. South African Medical Journal. <https://www.ajol.info/index.php/samj/article/view/157934>
- Wilkinson, M., & Vember, H. (2013). Family members' perceptions and expectations of the use of syringe drivers: A South African study. *International Journal of Palliative Nursing*, 19(10), 488–494. <https://doi.org/10.12968/ijpn.2013.19.10.488>
- Williams, S. E. I., Carmichael, T. R., Wainstein, T., Hobbs, A., & Ramsay, M. (2015). MYOC mutations in black South African patients with primary open-angle glaucoma: Genetic testing and cascade screening. *Ophthalmic Genetics*, 36(1), 31–38. <https://doi.org/10.3109/13816810.2014.972520>

- Williams, S. E. I., Whigham, B. T., Liu, Y., Carmichael, T. R., Qin, X., Schmidt, S., Ramsay, M., Hauser, M. A., & Allingham, R. R. (2010). Major LOXL1 risk allele is reversed in exfoliation glaucoma in a black South African population. *Molecular Vision*, *16*, 705–712. <http://www.molvis.org/molvis/v16/a80>
- Wilunda, B., Ng, N., & Stewart Williams, J. (2015). Health and ageing in Nairobi's informal settlements-evidence from the International Network for the Demographic Evaluation of Populations and Their Health (INDEPTH): A cross sectional study Global health. *BMC Public Health*, *15*(1), 1231. <https://doi.org/10.1186/s12889-015-2556-x>
- Wolff, E. M. P. (1978). *Health needs of geriatric patients discharged from hospital*. South African Medical Journal. [https://journals.co.za/content/m\\_samj/54/3/AJA20785135\\_18933](https://journals.co.za/content/m_samj/54/3/AJA20785135_18933)
- Wood, L., Robinson, R., Gavine, L., Juritz, J., & Jacobs, P. (2007). A single unit lymphoma experience - Outcome in a Cape Town academic centre. *Transfusion and Apheresis Science*, *37*(1), 93–102. <https://doi.org/10.1016/j.transci.2007.06.002>
- Wyk, C. W., Farman, A. G., & Staz, J. (1977). Oral health status of institutionalized elderly Cape Coloreds from the Cape Peninsula of South Africa. *Community Dentistry and Oral Epidemiology*, *5*(4), 179–184. <https://doi.org/10.1111/j.1600-0528.1977.tb01636.x>
- Wyk, G. W., Farman, A. G., & Staz, J. (1977). Tooth survival in institutionalized elderly Cape Coloreds from the Cape Peninsula of South Africa. *Community Dentistry and Oral Epidemiology*, *5*(4), 185–189. <https://doi.org/10.1111/j.1600-0528.1977.tb01637.x>
- Xavier Gómez-Olivé, F., Thorogood, M., Clark, B. D., Kahn, K., & Tollman, S. M. (2010). Assessing health and well-being among older people in rural South Africa. *Global Health Action*, *3*(1), 2126. <https://doi.org/10.3402/gha.v3i0.2126>
- Yawson, A. E., Ackuaku-Dogbe, E. M., Seneadza, N. A. H., Mensah, G., Minicuci, N., Naidoo, N., Chatterji, S., Kowal, P., & Biritwum, R. B. (2014). Self-reported cataracts in older adults in Ghana: Sociodemographic and health related factors. *BMC Public Health*, *14*(1), 949. <https://doi.org/10.1186/1471-2458-14-949>
- Yawson, A. E., Baddoo, A., Hagan-Seneadza, N. A., Calys-Tagoe, B., Hewlett, S., Dako-Gyeke, P., Mensah, G., Minicuci, N., Naidoo, N., Chatterji, S., Kowal, P., & Biritwum, R. (2013). Tobacco use in older adults in Ghana: Sociodemographic characteristics, health risks and subjective wellbeing. *BMC Public Health*, *13*(1), 979. <https://doi.org/10.1186/1471-2458-13-979>
- Yorston, D., Gichuhi, S., Wood, M., & Foster, A. (2002). Does prospective monitoring improve cataract surgery outcomes in Africa? *British Journal of*

*Ophthalmology*, 86(5), 543–547. <https://doi.org/10.1136/bjo.86.5.543>

Zengin, A., Fulford, A. J., Sawo, Y., Jarjou, L. M., Schoenmakers, I., Goldberg, G., Prentice, A., & Ward, K. A. (2017). The Gambian Bone and Muscle Ageing Study: Baseline Data from a Prospective Observational African Sub-Saharan Study. *Frontiers in Endocrinology*, 8(AUG), 31. <https://doi.org/10.3389/fendo.2017.00219>

Zengin, A., Jarjou, L. M., Prentice, A., Cooper, C., Ebeling, P. R., & Ward, K. A. (2018). The prevalence of sarcopenia and relationships between muscle and bone in ageing West-African Gambian men and women. *Journal of Cachexia, Sarcopenia and Muscle*, 9(5), 920–928. <https://doi.org/10.1002/jcsm.12341>

Zimba Kalula, S., Ferreira, M., Swingler, G., Badri, M., & Aihie Sayer, A. (2015). Prevalence of falls in an urban community-dwelling older population of Cape Town, South Africa. *Journal of Nutrition, Health and Aging*, 19(10), 1024–1031. <https://doi.org/10.1007/s12603-015-0664-z>

Zimmer, Z., & Dayton, J. (2005). Older adults in sub-Saharan Africa living with children and grandchildren. *Population Studies*, 59(3), 295–312. <https://doi.org/10.1080/00324720500212255>

Zwi, A. B., Reid, G., Landau, S. P., Kielkowski, D., Sitas, F., & Becklake, M. R. (1989). Mesothelioma in South Africa, 1976-84: Incidence and case characteristics. *International Journal of Epidemiology*, 18(2), 320–329. <https://doi.org/10.1093/ije/18.2.320>
